# Supplementary material for: Regional Greenland accumulation variability from Operation IceBridge airborne accumulation radar
Source: Copernicus journal article supplement (doi:10.5194/tc-11-773-2017), 2017-03-23
Supplement: Supplementary file 1 [file tc-11-773-2017-supplement.zip]

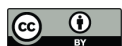

## *Supplement of*

# **Regional Greenland accumulation variability from Operation IceBridge airborne accumulation radar**

**Gabriel Lewis et al.**

*Correspondence to:* Gabriel Lewis ([gabriel.m.lewis.gr@dartmouth.edu](mailto:gabriel.m.lewis.gr@dartmouth.edu))

- [tc-11-773-2017-supplement-title-page.pdf](#)
- [ALL ICEBRIDGE DATA.xlsx](#)

The copyright of individual parts of the supplement might differ from the CC-BY 3.0 licence.
