# Supplementary material for: Regional Greenland accumulation variability from Operation IceBridge airborne accumulation radar
Source: Copernicus journal article supplement (doi:10.5194/tc-11-773-2017), 2017-03-23
Supplement: Supplementary file 2 [file tc-11-773-2017-supplement.zip]

Archive with 2 entries (2 files):
- ALL ICEBRIDGE DATA.xlsx
- tc-11-773-2017-supplement-title-page.pdf
