# Supplementary material for: Regional Greenland accumulation variability from Operation IceBridge airborne accumulation radar
Source: Copernicus journal article supplement (doi:10.5194/tc-11-773-2017), 2017-03-23
Supplement: Supplementary file 2 [file tc-11-773-2017-supplement.zip › ALL ICEBRIDGE DATA.xlsx]

## Sheet: Sheet1
		Accumulation in m w.e. a^-1 for each time period
Latitude	Longtidue	2014-2004	2004-1997	1997-1991	1991-1987	1987-1976	1976-1968	1968-1962	1962-1957	1957-1950	1950-1941	1941-1921	1921-1899	1899-1880	1880-1855	1855-1817	1817-1778	1778-1746	1746-1712
72.512	-37.767	0.249332	0.199543	0.206746	0.29194	0.182149	0.23685	0.218109	0.236516	0.231489	0.233937	0.218022	0.198096	0.255368	0.229548	0.225417	0.221125	0.228412	0.228497
72.5094	-37.7721	0.249335	0.199542	0.218386	0.271939	0.182149	0.236847	0.224599	0.228902	0.231482	0.233929	0.218013	0.198086	0.255343	0.229525	0.225388	0.219842	0.228346	0.229947
72.5056	-37.7796	0.249338	0.20374	0.22451	0.251908	0.178779	0.241531	0.224595	0.228898	0.231477	0.233921	0.218006	0.198077	0.255322	0.229504	0.225364	0.219812	0.228305	0.229899
72.503	-37.7847	0.249342	0.212169	0.225082	0.211543	0.178572	0.250895	0.211614	0.244107	0.231476	0.23392	0.220126	0.200152	0.250473	0.229494	0.225351	0.222291	0.226712	0.229887
72.4991	-37.7922	0.249345	0.232689	0.214246	0.15104	0.181619	0.260253	0.192192	0.266905	0.231485	0.233929	0.226509	0.200338	0.243224	0.229507	0.225365	0.2273	0.225196	0.229951
72.4966	-37.7972	0.249348	0.236764	0.20852	0.151043	0.181623	0.265075	0.185824	0.266915	0.231493	0.233939	0.228645	0.202426	0.238393	0.233268	0.225446	0.227365	0.225249	0.228479
72.4927	-37.8047	0.249352	0.224558	0.225698	0.151046	0.18835	0.270199	0.179625	0.251738	0.231505	0.233951	0.228658	0.208514	0.231142	0.238918	0.22557	0.229965	0.222149	0.227035
72.4888	-37.8121	0.249355	0.220489	0.231409	0.161177	0.195207	0.26098	0.199178	0.23676	0.23172	0.229405	0.226626	0.208528	0.236122	0.237157	0.226908	0.232546	0.222251	0.225607
72.4862	-37.8171	0.249358	0.22456	0.225708	0.181467	0.188699	0.260991	0.212179	0.236996	0.231935	0.229601	0.222543	0.208541	0.241106	0.237271	0.226998	0.233873	0.220721	0.225664
72.4823	-37.8245	0.249362	0.22048	0.231437	0.211969	0.178918	0.261004	0.225207	0.229494	0.232051	0.234467	0.222713	0.20868	0.238765	0.239225	0.228378	0.23524	0.219219	0.227271
72.4798	-37.8295	0.249365	0.207958	0.248252	0.232342	0.172391	0.270677	0.212419	0.229507	0.232065	0.234483	0.226989	0.208817	0.233935	0.243014	0.228476	0.234073	0.220885	0.227343
72.4759	-37.8369	0.249369	0.207958	0.248254	0.252752	0.155748	0.299271	0.180187	0.244762	0.249707	0.215732	0.231171	0.208875	0.238955	0.243151	0.227284	0.231602	0.225705	0.227365
72.4734	-37.8418	0.249372	0.216401	0.237134	0.252752	0.149029	0.308632	0.167204	0.259998	0.261488	0.196894	0.235266	0.210898	0.241488	0.241346	0.228584	0.22912	0.228901	0.227358
72.4695	-37.8493	0.249375	0.228628	0.220004	0.252754	0.149031	0.308632	0.160723	0.267612	0.261488	0.1732	0.245503	0.216989	0.234193	0.246987	0.227392	0.226651	0.230497	0.231915
72.4658	-37.8567	0.249379	0.224549	0.237484	0.232655	0.152391	0.303951	0.160725	0.267611	0.261486	0.163745	0.249589	0.221051	0.229325	0.24886	0.229983	0.222952	0.235319	0.233454
72.4632	-37.8617	0.249382	0.2164	0.260643	0.212525	0.159118	0.294582	0.173697	0.252381	0.261486	0.173202	0.247631	0.223147	0.226944	0.247018	0.232546	0.220485	0.236917	0.234971
72.4594	-37.8691	0.249385	0.228626	0.249401	0.222855	0.172797	0.266421	0.193196	0.229505	0.261482	0.20164	0.241738	0.219261	0.23196	0.241495	0.232528	0.224217	0.236942	0.234979
72.4569	-37.874	0.249389	0.236769	0.237944	0.243305	0.183149	0.233217	0.206016	0.229503	0.261477	0.220649	0.235662	0.213213	0.239302	0.239643	0.232508	0.229201	0.233755	0.234969
72.4532	-37.8814	0.249392	0.240848	0.232209	0.253548	0.196832	0.195163	0.22522	0.229504	0.261478	0.23494	0.2295	0.205087	0.249024	0.245285	0.228748	0.23671	0.225784	0.238011
72.4507	-37.8863	0.249395	0.240847	0.23221	0.253549	0.196833	0.195165	0.225221	0.229504	0.273266	0.225595	0.229498	0.19697	0.258738	0.249044	0.226234	0.239201	0.225799	0.238013
72.4469	-37.8936	0.249399	0.240848	0.220442	0.273715	0.183263	0.214031	0.225226	0.22951	0.290994	0.211568	0.229504	0.188876	0.268459	0.249051	0.227524	0.237978	0.22903	0.238047
72.4431	-37.9008	0.249402	0.240848	0.202829	0.293656	0.16625	0.242263	0.225231	0.244983	0.279431	0.211573	0.22951	0.18888	0.275947	0.243546	0.231384	0.234294	0.23226	0.238078
72.4406	-37.9057	0.249405	0.23677	0.220307	0.25309	0.162693	0.256346	0.225236	0.260486	0.267857	0.211578	0.229516	0.194958	0.273658	0.239875	0.232674	0.233069	0.235492	0.238109
72.4369	-37.9128	0.249409	0.22456	0.255141	0.17189	0.175685	0.261038	0.225239	0.268248	0.262065	0.211581	0.231652	0.205161	0.259063	0.243642	0.230168	0.234318	0.235503	0.238114
72.4343	-37.9176	0.249412	0.22049	0.260852	0.151561	0.185585	0.266012	0.212444	0.268252	0.262069	0.211585	0.235926	0.201219	0.259064	0.247413	0.228948	0.235594	0.233921	0.238122
72.4306	-37.9247	0.249415	0.22049	0.260854	0.151562	0.195714	0.266442	0.206234	0.268502	0.250486	0.211587	0.240203	0.191187	0.266359	0.249296	0.231549	0.23566	0.233964	0.238152
72.4268	-37.9319	0.249419	0.22049	0.260857	0.192256	0.19618	0.262156	0.206548	0.268875	0.233092	0.211589	0.240205	0.193216	0.271414	0.243779	0.234119	0.236958	0.230781	0.238155
72.4243	-37.9366	0.249422	0.22049	0.26086	0.233105	0.189853	0.262434	0.193697	0.268878	0.233094	0.211592	0.240207	0.199305	0.269109	0.241983	0.235436	0.235747	0.229177	0.238145
72.4206	-37.9438	0.249425	0.22049	0.260863	0.25358	0.18329	0.262439	0.193701	0.268883	0.233099	0.211596	0.238073	0.209411	0.259368	0.247644	0.234251	0.233285	0.234017	0.23666
72.4181	-37.9486	0.249429	0.22049	0.260866	0.253584	0.183293	0.262442	0.193704	0.268886	0.233102	0.211599	0.235939	0.211388	0.259369	0.249531	0.232996	0.233281	0.237242	0.23668
72.4143	-37.9558	0.255899	0.212321	0.260869	0.253588	0.179906	0.257459	0.187007	0.291847	0.233107	0.211603	0.23808	0.199257	0.271551	0.249534	0.232998	0.233282	0.237242	0.238201
72.4118	-37.9607	0.262405	0.204152	0.260873	0.26383	0.169855	0.257195	0.186831	0.307138	0.233112	0.211608	0.242361	0.18923	0.278856	0.249538	0.233	0.233283	0.237242	0.238201
72.4081	-37.9679	0.265674	0.212236	0.24372	0.294612	0.153236	0.261768	0.193245	0.307146	0.233118	0.211613	0.248788	0.185339	0.27643	0.249545	0.233006	0.233289	0.242097	0.236725
72.4043	-37.9752	0.265678	0.220366	0.232254	0.304898	0.149946	0.261774	0.193249	0.307154	0.233124	0.216381	0.253166	0.191592	0.266823	0.245871	0.233012	0.233294	0.245338	0.238281
72.4018	-37.98	0.265681	0.220367	0.232258	0.304904	0.149949	0.261781	0.20627	0.291877	0.244936	0.216562	0.24906	0.195664	0.266958	0.242198	0.233021	0.234558	0.24375	0.238292
72.3981	-37.9873	0.265685	0.220367	0.232261	0.30491	0.15333	0.257085	0.225843	0.268926	0.262687	0.21205	0.240664	0.193526	0.276783	0.240363	0.23689	0.234638	0.238959	0.241346
72.3956	-37.9921	0.265689	0.220368	0.232265	0.304916	0.160098	0.257361	0.213015	0.268934	0.262695	0.212056	0.240671	0.189472	0.281666	0.242258	0.238221	0.233438	0.240602	0.241383
72.3919	-37.9993	0.265692	0.220368	0.232269	0.304921	0.166879	0.26249	0.19374	0.26894	0.262701	0.216833	0.238618	0.191507	0.279237	0.247928	0.234462	0.235953	0.242261	0.238379
72.3894	-38.0041	0.265696	0.220369	0.232272	0.304927	0.17027	0.25778	0.193745	0.268947	0.262708	0.226394	0.234503	0.195574	0.274369	0.249824	0.233211	0.238469	0.239066	0.241432
72.3857	-38.0113	0.2657	0.208181	0.249475	0.325498	0.173867	0.243619	0.193749	0.268952	0.262713	0.226399	0.234508	0.203712	0.264619	0.249828	0.234502	0.239752	0.239102	0.242985
72.3819	-38.0185	0.265704	0.200071	0.260909	0.356431	0.167366	0.238895	0.193753	0.268958	0.262718	0.212076	0.244977	0.205868	0.257303	0.249831	0.238371	0.239825	0.239155	0.243024
72.3794	-38.0232	0.265707	0.200071	0.260912	0.356437	0.170767	0.234173	0.193757	0.268963	0.262724	0.21208	0.249271	0.201912	0.257307	0.249834	0.242242	0.237386	0.237554	0.246076
72.3757	-38.0304	0.265711	0.200071	0.260916	0.356442	0.180982	0.219979	0.19376	0.268968	0.262729	0.212085	0.251422	0.199935	0.25981	0.253665	0.242347	0.237457	0.237607	0.244589
72.3732	-38.0351	0.265715	0.200071	0.266809	0.346351	0.180985	0.219983	0.193764	0.268973	0.262734	0.202545	0.257694	0.197958	0.264817	0.253764	0.241125	0.238739	0.237641	0.244614
72.3694	-38.0422	0.265718	0.200072	0.284517	0.316023	0.170777	0.234187	0.193769	0.26898	0.274584	0.17889	0.270321	0.192018	0.269831	0.250079	0.245004	0.235043	0.239263	0.244632
72.3669	-38.0469	0.265722	0.20413	0.284726	0.305901	0.17078	0.234192	0.193774	0.268987	0.286455	0.169516	0.27248	0.19004	0.269839	0.250087	0.246303	0.233816	0.242508	0.24314
72.3632	-38.054	0.265726	0.216305	0.26754	0.305907	0.184401	0.215264	0.193778	0.268994	0.292401	0.164827	0.272488	0.190045	0.269847	0.251985	0.245052	0.237593	0.240948	0.244699
72.3594	-38.0611	0.26573	0.220373	0.261804	0.305913	0.19806	0.196295	0.193783	0.269	0.292409	0.169587	0.270437	0.19005	0.269854	0.25767	0.241284	0.240114	0.240987	0.243204
72.3569	-38.0659	0.265733	0.220374	0.261808	0.305918	0.201484	0.201247	0.180929	0.28457	0.280788	0.179113	0.266325	0.190055	0.272364	0.257724	0.24003	0.240117	0.24423	0.24018
72.3532	-38.073	0.265737	0.232587	0.244583	0.305922	0.201487	0.215829	0.181186	0.284977	0.263332	0.198196	0.251636	0.196007	0.279889	0.252187	0.243906	0.236414	0.245851	0.238665
72.3507	-38.0778	0.265741	0.240753	0.233074	0.305928	0.201491	0.215834	0.194264	0.269633	0.263338	0.207758	0.243223	0.199973	0.282404	0.250344	0.246496	0.233948	0.245854	0.238668
72.3469	-38.085	0.265744	0.240754	0.233078	0.305933	0.201495	0.215839	0.194269	0.26964	0.263345	0.226905	0.234971	0.199979	0.282412	0.250351	0.246502	0.235211	0.247499	0.235648
72.3445	-38.0898	0.265748	0.240755	0.233082	0.305939	0.201499	0.215843	0.194273	0.269646	0.263351	0.236501	0.230842	0.199983	0.282419	0.250356	0.246507	0.237731	0.247537	0.231103
72.3407	-38.0969	0.265752	0.240756	0.233085	0.305944	0.201503	0.215848	0.194278	0.269652	0.263357	0.236507	0.230847	0.199988	0.282425	0.250361	0.246511	0.240252	0.245954	0.225025
72.337	-38.1041	0.265756	0.240756	0.233088	0.305949	0.201507	0.215852	0.194282	0.269658	0.263363	0.226921	0.237132	0.200048	0.285005	0.24667	0.246513	0.240253	0.245954	0.223502
72.3345	-38.1089	0.265759	0.240757	0.233092	0.305953	0.20151	0.215856	0.194285	0.269663	0.263368	0.217349	0.245562	0.200162	0.28514	0.242977	0.24393	0.242725	0.24271	0.226521
72.3307	-38.1161	0.265763	0.240758	0.233095	0.305959	0.201514	0.215861	0.200829	0.261998	0.263375	0.212572	0.251933	0.200279	0.282766	0.241136	0.240062	0.246437	0.237856	0.226489
72.3282	-38.1209	0.265767	0.240758	0.233099	0.305965	0.201519	0.215866	0.21393	0.246648	0.263382	0.212578	0.25194	0.200284	0.282774	0.243035	0.23881	0.246443	0.237861	0.22345
72.3244	-38.1281	0.26577	0.240759	0.233103	0.305971	0.201523	0.215872	0.227055	0.231284	0.26339	0.212584	0.251948	0.20029	0.282785	0.248725	0.235043	0.246452	0.233013	0.227987
72.3219	-38.133	0.265774	0.24076	0.233107	0.305977	0.201527	0.215877	0.227061	0.23129	0.263398	0.212591	0.251957	0.200297	0.282795	0.252525	0.232533	0.246461	0.229785	0.23254
72.3181	-38.1402	0.265778	0.240761	0.23902	0.295861	0.201532	0.215883	0.227068	0.231298	0.263408	0.22696	0.239321	0.206258	0.285322	0.256377	0.230058	0.24524	0.229799	0.237129
72.3143	-38.1475	0.265782	0.240763	0.256786	0.26545	0.201538	0.220754	0.220626	0.231307	0.26342	0.236564	0.230904	0.210234	0.292887	0.254636	0.231428	0.241552	0.229819	0.241732
72.3118	-38.1523	0.265785	0.240765	0.262725	0.255303	0.201544	0.230502	0.207721	0.231319	0.263435	0.236578	0.230919	0.210248	0.295434	0.256605	0.232808	0.237874	0.231469	0.244839
72.308	-38.1596	0.265789	0.240767	0.262733	0.255312	0.201551	0.245148	0.18834	0.254727	0.251909	0.246292	0.229021	0.2063	0.295472	0.260439	0.235488	0.234225	0.236389	0.248004
72.3054	-38.1644	0.265793	0.24077	0.262741	0.255322	0.201559	0.254932	0.175414	0.270379	0.252135	0.246507	0.231341	0.200365	0.295515	0.260477	0.238112	0.234312	0.239717	0.249651
72.3016	-38.1717	0.265796	0.240772	0.262747	0.255329	0.211834	0.250445	0.182141	0.247296	0.264044	0.237084	0.244267	0.192535	0.290636	0.260498	0.240723	0.234381	0.246276	0.249765
72.2991	-38.1766	0.2658	0.240774	0.262753	0.255336	0.218701	0.240916	0.195292	0.231891	0.264057	0.237096	0.250752	0.190659	0.285753	0.260521	0.240745	0.236926	0.247967	0.248305
72.2952	-38.1839	0.265804	0.240775	0.262758	0.255342	0.218706	0.23603	0.201782	0.231899	0.264067	0.237105	0.250762	0.19271	0.283314	0.260534	0.239462	0.241964	0.246409	0.246817
72.2913	-38.1911	0.265808	0.240776	0.24498	0.285798	0.208424	0.235678	0.221219	0.231906	0.264075	0.237112	0.23999	0.202667	0.283323	0.254838	0.239372	0.245688	0.24479	0.243747
72.2888	-38.1959	0.265811	0.240777	0.233158	0.306068	0.201585	0.240321	0.227697	0.231914	0.264085	0.237121	0.233544	0.208639	0.283339	0.251053	0.240615	0.248206	0.239948	0.24374
72.2849	-38.2031	0.265815	0.24078	0.233165	0.30608	0.201593	0.250099	0.214764	0.231929	0.264105	0.237139	0.24002	0.202693	0.283375	0.251086	0.24324	0.249562	0.231923	0.249899
72.2823	-38.208	0.265819	0.240782	0.233171	0.306091	0.208444	0.250371	0.201814	0.231942	0.27603	0.227716	0.248662	0.196789	0.280952	0.253014	0.2446	0.248382	0.231976	0.25303
72.2784	-38.2152	0.265822	0.240781	0.233172	0.30609	0.218733	0.240959	0.195328	0.231939	0.293923	0.21354	0.259452	0.192957	0.273566	0.258699	0.245974	0.247182	0.233616	0.256111
72.2745	-38.2226	0.265826	0.240781	0.250923	0.29632	0.212118	0.24096	0.195329	0.231939	0.29392	0.20393	0.267925	0.191012	0.276132	0.262586	0.243497	0.251003	0.233675	0.257683
72.2719	-38.2275	0.26583	0.240779	0.262784	0.296672	0.205488	0.240954	0.195325	0.231931	0.293903	0.194327	0.272053	0.191	0.281135	0.262642	0.242224	0.252237	0.235273	0.256106
72.268	-38.2348	0.265834	0.240777	0.262783	0.307021	0.202169	0.240951	0.195322	0.231925	0.293891	0.194322	0.267714	0.19498	0.283625	0.260754	0.246082	0.248469	0.238473	0.254533
72.2654	-38.2398	0.265837	0.240775	0.262781	0.307015	0.202168	0.240945	0.195318	0.231916	0.293873	0.203908	0.25923	0.198951	0.283586	0.260715	0.247336	0.247173	0.23841	0.254451
72.2615	-38.2472	0.265841	0.244858	0.257022	0.307013	0.202168	0.240942	0.195316	0.231912	0.293863	0.21351	0.252914	0.20298	0.281106	0.260689	0.247307	0.247136	0.238367	0.254394
72.2589	-38.2521	0.265845	0.253042	0.245489	0.307015	0.20217	0.240944	0.195318	0.231913	0.293863	0.218314	0.250839	0.207073	0.276187	0.26068	0.24989	0.244642	0.23835	0.254371
72.255	-38.2595	0.265848	0.261246	0.233938	0.307021	0.202175	0.240951	0.195324	0.23192	0.293873	0.232754	0.244621	0.211178	0.271286	0.260692	0.255091	0.239695	0.238361	0.254385
72.2511	-38.2669	0.265852	0.261247	0.233942	0.307027	0.202179	0.240956	0.195328	0.255377	0.276344	0.237579	0.24255	0.211184	0.271293	0.260698	0.257694	0.237221	0.238366	0.25439
72.2485	-38.2718	0.265856	0.261249	0.233947	0.307037	0.202185	0.231182	0.208302	0.27106	0.264654	0.232773	0.244642	0.211197	0.271315	0.260721	0.255121	0.239726	0.238394	0.254425
72.2446	-38.2792	0.26586	0.261252	0.233954	0.307049	0.202192	0.216548	0.247493	0.247924	0.264673	0.218353	0.250891	0.207116	0.276264	0.260755	0.246073	0.248447	0.236816	0.252936
72.242	-38.2841	0.265863	0.261255	0.23396	0.30706	0.202199	0.216558	0.260708	0.232483	0.26469	0.213561	0.252983	0.203036	0.281208	0.260784	0.239621	0.254686	0.233606	0.252956
72.2381	-38.2915	0.265867	0.261258	0.233966	0.307073	0.202207	0.216568	0.260724	0.232497	0.264709	0.218382	0.25093	0.201006	0.2837	0.260819	0.235768	0.258453	0.230403	0.254521
72.2355	-38.2964	0.265871	0.26126	0.233972	0.307083	0.202213	0.216577	0.260738	0.232509	0.264725	0.228018	0.246794	0.20102	0.283728	0.262749	0.238416	0.254764	0.230435	0.254563
72.2316	-38.3038	0.265874	0.261262	0.233977	0.307092	0.202219	0.216584	0.260748	0.232519	0.264737	0.237667	0.246966	0.199091	0.28129	0.268484	0.243717	0.247359	0.230472	0.257675
72.2276	-38.3111	0.269144	0.257156	0.245849	0.286766	0.202224	0.23124	0.241309	0.232526	0.264746	0.237675	0.25346	0.199258	0.273926	0.272311	0.250288	0.242471	0.230531	0.259268
72.225	-38.3161	0.275707	0.248942	0.257742	0.266407	0.202227	0.241031	0.228331	0.232531	0.26475	0.237679	0.255627	0.199316	0.271469	0.276128	0.251654	0.241272	0.232184	0.257766
72.2211	-38.3234	0.282305	0.240728	0.2637	0.256218	0.212533	0.226714	0.208553	0.25572	0.282666	0.223493	0.262126	0.193329	0.279036	0.274371	0.250423	0.243827	0.235484	0.256297
72.2185	-38.3283	0.282309	0.240729	0.25775	0.266416	0.219418	0.217154	0.195398	0.271165	0.294635	0.204394	0.268458	0.191333	0.284087	0.27065	0.249123	0.246334	0.237123	0.257855
72.2144	-38.3359	0.282314	0.240729	0.239926	0.296954	0.219422	0.217159	0.195402	0.27117	0.29464	0.204398	0.268463	0.191337	0.28409	0.270652	0.246525	0.252619	0.238797	0.256368
72.2118	-38.3409	0.282318	0.24073	0.233998	0.307122	0.219426	0.217163	0.195406	0.271175	0.294646	0.214034	0.264307	0.19134	0.284094	0.270655	0.243928	0.257641	0.238827	0.254854
72.2079	-38.3483	0.282322	0.24073	0.234	0.307125	0.219429	0.217165	0.195408	0.271177	0.294647	0.228494	0.255898	0.193339	0.284089	0.270649	0.237431	0.263849	0.242069	0.251791
72.2039	-38.3557	0.282326	0.24073	0.251814	0.276616	0.219432	0.217168	0.20857	0.255739	0.294649	0.238153	0.245241	0.201381	0.286674	0.266924	0.234832	0.266327	0.246944	0.247209
72.2013	-38.3607	0.28233	0.240731	0.26372	0.256239	0.212552	0.226735	0.221756	0.240288	0.294651	0.228498	0.247247	0.20748	0.286798	0.263197	0.234827	0.266316	0.246932	0.247195
72.1973	-38.3681	0.282334	0.240731	0.251819	0.276621	0.202252	0.24106	0.228358	0.232557	0.294651	0.21404	0.253486	0.211585	0.284389	0.261327	0.237412	0.263813	0.246914	0.248707
72.1946	-38.3731	0.282338	0.24073	0.239941	0.296971	0.202254	0.241061	0.228359	0.248228	0.282927	0.218856	0.251405	0.211583	0.284378	0.261316	0.241292	0.260062	0.246891	0.251749
72.1906	-38.3806	0.282342	0.240731	0.245881	0.286804	0.202257	0.255758	0.208883	0.271788	0.265328	0.233327	0.247325	0.209587	0.289428	0.263311	0.245277	0.256394	0.242045	0.259413
72.188	-38.3855	0.282346	0.240731	0.257774	0.266441	0.20569	0.265711	0.189383	0.271788	0.265327	0.238157	0.249566	0.20559	0.294476	0.263393	0.249227	0.252693	0.238804	0.265535
72.184	-38.393	0.28235	0.240731	0.263731	0.25625	0.216004	0.266117	0.169868	0.27179	0.265329	0.238158	0.253897	0.207752	0.289606	0.263432	0.255756	0.249019	0.237212	0.26862
72.1799	-38.4005	0.282355	0.240731	0.263735	0.287319	0.209487	0.266255	0.163358	0.271794	0.265332	0.24299	0.256149	0.207865	0.289729	0.265432	0.257154	0.246571	0.238863	0.268649
72.1773	-38.4056	0.282359	0.240731	0.263737	0.308084	0.202835	0.266258	0.16336	0.271796	0.265334	0.25266	0.256316	0.203864	0.294787	0.263609	0.258481	0.244075	0.238852	0.270171
72.1732	-38.4131	0.282363	0.240732	0.269692	0.297893	0.202838	0.251506	0.182891	0.271799	0.277295	0.24318	0.258487	0.201863	0.297318	0.261742	0.261082	0.24158	0.243723	0.270197
72.1705	-38.4181	0.282367	0.240732	0.281617	0.277484	0.202841	0.241694	0.195896	0.271803	0.289276	0.224032	0.26266	0.201866	0.297318	0.26556	0.258542	0.242842	0.245362	0.270215
72.1665	-38.4256	0.282371	0.240732	0.293563	0.257043	0.202844	0.241697	0.195899	0.271806	0.295273	0.214463	0.269084	0.201973	0.299977	0.265694	0.254727	0.246632	0.243771	0.267148
72.1638	-38.4307	0.282375	0.240733	0.293567	0.257047	0.202847	0.241701	0.195902	0.27181	0.295277	0.224119	0.269262	0.202081	0.300107	0.261961	0.254724	0.250427	0.242185	0.267164
72.1598	-38.4382	0.282379	0.244824	0.287788	0.25705	0.20285	0.241705	0.195906	0.271814	0.295281	0.238628	0.265177	0.202136	0.297636	0.261961	0.254723	0.25676	0.237377	0.268721
72.1557	-38.4458	0.282383	0.257126	0.264439	0.267281	0.209739	0.232139	0.19591	0.27182	0.295288	0.238633	0.265183	0.20214	0.297642	0.261965	0.25733	0.260614	0.234201	0.265683
72.153	-38.4509	0.282387	0.261237	0.246709	0.287714	0.216639	0.22256	0.195914	0.279683	0.289422	0.238638	0.265188	0.202144	0.297646	0.265789	0.257397	0.260659	0.232604	0.267231
72.149	-38.4585	0.282391	0.248922	0.252197	0.308117	0.220095	0.217767	0.195918	0.303304	0.271795	0.238642	0.265192	0.202147	0.297647	0.271526	0.25619	0.259433	0.23099	0.271842
72.1462	-38.4635	0.282396	0.240736	0.263768	0.308122	0.220098	0.227583	0.182918	0.311195	0.265916	0.238646	0.265195	0.20215	0.297648	0.271526	0.258794	0.256937	0.232611	0.273387
72.1422	-38.4711	0.2824	0.240737	0.263772	0.308126	0.220102	0.242336	0.16339	0.3112	0.26592	0.23865	0.265199	0.202153	0.29765	0.275353	0.258859	0.254442	0.237486	0.273419
72.1381	-38.4787	0.282404	0.240737	0.263775	0.30813	0.220105	0.242339	0.163393	0.311203	0.265923	0.238652	0.265202	0.202154	0.297648	0.281094	0.25504	0.254435	0.239105	0.2765
72.1354	-38.4838	0.282408	0.240737	0.263778	0.287369	0.226767	0.242343	0.163396	0.319091	0.260048	0.238656	0.265205	0.202156	0.297648	0.281093	0.255038	0.25443	0.239099	0.27803
72.1313	-38.4914	0.282412	0.240738	0.263782	0.256303	0.236737	0.242347	0.183178	0.319523	0.260367	0.224411	0.267381	0.200155	0.300184	0.279226	0.252432	0.25692	0.243978	0.273441
72.1286	-38.4965	0.282416	0.240739	0.275697	0.246265	0.233422	0.242352	0.196397	0.311903	0.266478	0.214906	0.271733	0.196149	0.30526	0.275493	0.249829	0.259412	0.247234	0.270384
72.1245	-38.5041	0.28242	0.240739	0.29361	0.246708	0.223451	0.242356	0.196401	0.311909	0.266484	0.229423	0.269824	0.194195	0.307869	0.271759	0.248529	0.260659	0.252124	0.265805
72.1218	-38.5091	0.282424	0.24074	0.293615	0.277858	0.213464	0.242361	0.209629	0.296385	0.266489	0.23912	0.265647	0.198314	0.308004	0.268026	0.248532	0.26066	0.258649	0.259703
72.1177	-38.5167	0.282428	0.240741	0.293619	0.309088	0.203457	0.242366	0.22951	0.273069	0.266494	0.239124	0.267827	0.202488	0.308203	0.26242	0.251136	0.261974	0.258695	0.259735
72.1137	-38.5242	0.282433	0.240741	0.293622	0.288265	0.210137	0.24237	0.229514	0.273073	0.266498	0.239128	0.274363	0.202647	0.300777	0.260508	0.257618	0.26333	0.250611	0.267417
72.111	-38.5292	0.282437	0.240742	0.293627	0.267483	0.216808	0.242375	0.229519	0.273079	0.266504	0.239134	0.276549	0.202703	0.298305	0.256688	0.262772	0.263378	0.247382	0.270496
72.107	-38.5366	0.282441	0.240743	0.293632	0.246729	0.223472	0.24238	0.229524	0.273086	0.266511	0.23914	0.27002	0.208739	0.293235	0.256609	0.267929	0.259618	0.245741	0.270475
72.1043	-38.5416	0.282445	0.240744	0.293637	0.246734	0.223477	0.242387	0.229531	0.273095	0.26652	0.239148	0.265678	0.2107	0.290651	0.260356	0.267942	0.257093	0.244095	0.268915
72.1003	-38.549	0.282449	0.240746	0.293645	0.257124	0.220153	0.242398	0.22291	0.280889	0.266536	0.239162	0.26352	0.206538	0.295567	0.262249	0.264057	0.25579	0.240811	0.268885
72.0976	-38.554	0.282453	0.240748	0.293652	0.257131	0.22016	0.242406	0.209669	0.296449	0.266548	0.239173	0.259183	0.208503	0.298062	0.262267	0.261468	0.255767	0.239175	0.270415
72.0936	-38.5614	0.282457	0.240749	0.293657	0.288305	0.210168	0.242412	0.196448	0.311992	0.272558	0.234421	0.254845	0.21252	0.29807	0.266099	0.258932	0.255773	0.237552	0.271948
72.0896	-38.5687	0.282461	0.24075	0.311601	0.278428	0.206946	0.237619	0.203063	0.304234	0.290602	0.229833	0.252841	0.214643	0.298205	0.270025	0.257761	0.257114	0.235989	0.276616
72.0869	-38.5736	0.282465	0.24075	0.323593	0.257918	0.21386	0.237858	0.203258	0.288695	0.296627	0.234773	0.253002	0.214756	0.300868	0.268242	0.26043	0.257195	0.237667	0.278209
72.0829	-38.581	0.282469	0.240751	0.323597	0.289183	0.21076	0.24303	0.210172	0.257591	0.296631	0.239635	0.261791	0.212968	0.301123	0.268419	0.261862	0.259842	0.244282	0.275257
72.0803	-38.5858	0.282474	0.244842	0.317813	0.310078	0.204065	0.243032	0.223453	0.242027	0.29663	0.239635	0.270507	0.209051	0.303781	0.266625	0.261913	0.262411	0.249216	0.272232
72.0763	-38.5931	0.282478	0.257146	0.300425	0.31008	0.204066	0.252901	0.21702	0.250016	0.284827	0.239633	0.277049	0.203008	0.311403	0.262909	0.261927	0.266224	0.24925	0.272244
72.0736	-38.598	0.282482	0.261256	0.29462	0.310082	0.204069	0.262787	0.217215	0.250241	0.273015	0.239634	0.277048	0.203007	0.311393	0.262901	0.261916	0.267479	0.247615	0.275301
72.0697	-38.6053	0.282486	0.261257	0.294624	0.310086	0.204072	0.267738	0.223971	0.242554	0.267109	0.239636	0.27705	0.203008	0.31139	0.264813	0.260637	0.26747	0.242714	0.282961
72.0658	-38.6125	0.28249	0.25304	0.288265	0.34087	0.204075	0.267741	0.204019	0.26595	0.267111	0.239638	0.27705	0.203009	0.30375	0.276181	0.256808	0.267459	0.239444	0.286002
72.0631	-38.6173	0.282494	0.244843	0.287901	0.361358	0.204079	0.267746	0.197382	0.273747	0.267116	0.239643	0.277056	0.203012	0.29867	0.281849	0.255535	0.267459	0.239443	0.285999
72.0591	-38.6247	0.282498	0.240752	0.305644	0.340881	0.204082	0.262803	0.203939	0.273751	0.26712	0.239647	0.27706	0.203015	0.298672	0.281849	0.255535	0.267456	0.244327	0.281401
72.0565	-38.6295	0.282502	0.240753	0.317627	0.320374	0.204087	0.252925	0.217042	0.273759	0.267129	0.239654	0.277069	0.203022	0.298683	0.28186	0.255543	0.267466	0.249228	0.276823
72.0526	-38.6367	0.282506	0.240754	0.341631	0.258415	0.210789	0.243062	0.23013	0.273767	0.267136	0.239661	0.277077	0.203027	0.298692	0.285707	0.256917	0.26754	0.249279	0.273785
72.0501	-38.6415	0.28251	0.240755	0.365702	0.196437	0.217482	0.243069	0.230137	0.273775	0.267145	0.239669	0.277086	0.203034	0.298704	0.289561	0.256989	0.267596	0.250951	0.272292
72.0462	-38.6486	0.282515	0.240756	0.383804	0.155132	0.220826	0.248008	0.223603	0.273784	0.267154	0.244534	0.275	0.203041	0.301259	0.289622	0.25703	0.270175	0.251007	0.270802
72.0423	-38.6558	0.282519	0.24485	0.378021	0.155135	0.224293	0.258024	0.223912	0.250403	0.267161	0.259135	0.268714	0.207178	0.30394	0.284006	0.260957	0.268978	0.247779	0.272352
72.0397	-38.6605	0.282523	0.253049	0.366433	0.155138	0.23123	0.253341	0.230684	0.234801	0.279205	0.254467	0.266623	0.21132	0.301531	0.28214	0.262274	0.270283	0.244554	0.275447
72.0358	-38.6676	0.282527	0.261268	0.354823	0.155141	0.238179	0.243696	0.230689	0.234807	0.297303	0.240137	0.26663	0.213395	0.306694	0.276521	0.262281	0.274112	0.239709	0.278541
72.0332	-38.6723	0.282531	0.261269	0.354829	0.155144	0.238184	0.243702	0.230696	0.234814	0.297312	0.245012	0.26454	0.213402	0.311804	0.272778	0.26229	0.274122	0.239718	0.28164
72.0294	-38.6794	0.282535	0.261271	0.354836	0.155147	0.23819	0.243709	0.230702	0.234821	0.297322	0.259641	0.258244	0.213409	0.311816	0.278552	0.258471	0.274133	0.239728	0.286289
72.0268	-38.6841	0.282539	0.261272	0.354843	0.15515	0.238195	0.243716	0.230709	0.234828	0.297332	0.26453	0.256149	0.213416	0.311829	0.282408	0.255927	0.274145	0.239737	0.286303
72.0229	-38.6913	0.282543	0.261274	0.354851	0.155154	0.238202	0.243723	0.230717	0.234836	0.297344	0.264541	0.25616	0.213425	0.311847	0.282424	0.255942	0.274163	0.239753	0.286327
72.019	-38.6984	0.282547	0.261275	0.354858	0.155157	0.238208	0.24373	0.230724	0.250662	0.285523	0.264551	0.256169	0.213433	0.311862	0.282437	0.255954	0.274177	0.239766	0.286345
72.0164	-38.7032	0.282551	0.261277	0.354867	0.15516	0.238214	0.243738	0.230732	0.266519	0.273693	0.264563	0.258364	0.211428	0.311883	0.282457	0.255971	0.274199	0.239785	0.286375
72.0125	-38.7103	0.282556	0.261279	0.354875	0.155164	0.238221	0.243746	0.237405	0.266651	0.267779	0.264574	0.26493	0.205388	0.311902	0.282474	0.255987	0.274219	0.239803	0.286402
72.0099	-38.7151	0.28256	0.26128	0.354881	0.155167	0.238226	0.243752	0.250757	0.251022	0.267787	0.264583	0.267126	0.203375	0.311913	0.282483	0.257302	0.272976	0.243075	0.286437
72.006	-38.7223	0.282564	0.261281	0.354888	0.15517	0.238231	0.243759	0.264134	0.235378	0.267795	0.264591	0.267135	0.203382	0.311925	0.282494	0.261236	0.269228	0.247984	0.288034
72.0033	-38.7271	0.282568	0.261283	0.354895	0.155173	0.238237	0.243765	0.264141	0.235385	0.267804	0.264599	0.267143	0.203388	0.311936	0.282504	0.263863	0.268007	0.246374	0.291143
71.9994	-38.7344	0.282572	0.261284	0.354901	0.155176	0.238242	0.243771	0.264149	0.235392	0.273842	0.259823	0.267152	0.203394	0.311947	0.288288	0.265274	0.266828	0.24479	0.294278
71.9955	-38.7416	0.282576	0.261285	0.354907	0.155179	0.238247	0.243777	0.244107	0.258871	0.291968	0.245463	0.267158	0.209608	0.304493	0.292147	0.270583	0.26441	0.244849	0.295881
71.9928	-38.7464	0.28258	0.261286	0.354912	0.155181	0.231305	0.263337	0.217654	0.274508	0.298023	0.240675	0.267163	0.213756	0.302069	0.290269	0.275831	0.263218	0.243256	0.297453
71.9889	-38.7537	0.282584	0.261287	0.354917	0.155184	0.224374	0.287869	0.197949	0.274513	0.316186	0.236058	0.267332	0.213866	0.304747	0.290409	0.278552	0.262045	0.244943	0.297509
71.9862	-38.7585	0.282588	0.261287	0.354921	0.155186	0.231312	0.278225	0.197951	0.274515	0.328317	0.236227	0.267497	0.213973	0.307419	0.288614	0.279921	0.262097	0.246607	0.295987
71.9823	-38.7658	0.282592	0.261287	0.354924	0.176001	0.231575	0.268568	0.217951	0.251064	0.346527	0.226714	0.27196	0.214132	0.307601	0.288743	0.278696	0.265954	0.246664	0.291378
71.9783	-38.773	0.282597	0.261288	0.354929	0.207302	0.228476	0.258911	0.231314	0.235415	0.358695	0.217107	0.278543	0.214292	0.307785	0.292738	0.272284	0.268502	0.248322	0.286757
71.9756	-38.7778	0.282601	0.261289	0.354933	0.207305	0.235438	0.239322	0.244472	0.235418	0.358697	0.217109	0.278544	0.214293	0.312896	0.292824	0.267089	0.271004	0.248311	0.28674
71.9717	-38.7851	0.282605	0.261289	0.354938	0.207309	0.238927	0.219639	0.264183	0.235423	0.376966	0.202697	0.276356	0.214245	0.315398	0.292829	0.259224	0.275985	0.251557	0.285192
71.969	-38.7899	0.282609	0.26129	0.354944	0.207312	0.235448	0.224483	0.264189	0.235429	0.389171	0.193081	0.271977	0.214145	0.317835	0.294719	0.253987	0.278454	0.25153	0.285169
71.965	-38.7971	0.282613	0.261292	0.367028	0.186677	0.225018	0.238989	0.264197	0.235436	0.389185	0.193087	0.267605	0.214046	0.315161	0.292661	0.25519	0.277121	0.253119	0.282052
71.9623	-38.8019	0.282617	0.261293	0.379136	0.166011	0.221551	0.243823	0.264206	0.235444	0.3831	0.197905	0.267616	0.214054	0.312623	0.286845	0.262944	0.272077	0.25638	0.27898
71.9584	-38.8091	0.282621	0.273641	0.36775	0.155668	0.221556	0.243829	0.264212	0.23545	0.364833	0.212335	0.272005	0.212091	0.310139	0.284925	0.270786	0.26581	0.258023	0.278998
71.9544	-38.8163	0.282625	0.281896	0.356095	0.155671	0.22156	0.243833	0.264217	0.24338	0.352815	0.217144	0.27859	0.212249	0.300107	0.296454	0.272254	0.262107	0.258064	0.280574
71.9517	-38.8212	0.282629	0.281897	0.356101	0.155674	0.221565	0.243839	0.264223	0.259259	0.328775	0.226762	0.278597	0.214332	0.292515	0.306023	0.269726	0.263407	0.256458	0.283684
71.9477	-38.8284	0.282633	0.273644	0.367769	0.16611	0.218218	0.243845	0.264231	0.275168	0.298692	0.241175	0.278606	0.210184	0.292409	0.309802	0.264485	0.26716	0.254815	0.288315
71.945	-38.8332	0.282638	0.261293	0.385237	0.187013	0.211512	0.243852	0.264239	0.275178	0.298703	0.241183	0.274229	0.21009	0.297407	0.302089	0.264379	0.269643	0.251528	0.289837
71.941	-38.8404	0.282642	0.24488	0.40847	0.207959	0.204796	0.243861	0.264251	0.275191	0.298719	0.241196	0.267669	0.214096	0.299921	0.292467	0.264249	0.273393	0.248255	0.288279
71.9384	-38.8453	0.282646	0.240788	0.414274	0.207964	0.204801	0.243869	0.26426	0.275202	0.31086	0.231602	0.267681	0.216181	0.297448	0.292485	0.264266	0.273413	0.24991	0.288318
71.9344	-38.8525	0.28265	0.248982	0.40269	0.228924	0.198082	0.258737	0.251242	0.283289	0.317201	0.217191	0.269885	0.228714	0.277467	0.302107	0.270965	0.267241	0.256536	0.289992
71.9304	-38.8598	0.282654	0.261307	0.385267	0.260442	0.184506	0.27847	0.251589	0.283664	0.299341	0.236752	0.27242	0.237345	0.260124	0.311887	0.281714	0.26118	0.259976	0.293261
71.9277	-38.8646	0.282658	0.269535	0.373641	0.260447	0.177571	0.298076	0.258529	0.260101	0.299347	0.256362	0.274951	0.233462	0.262827	0.314023	0.285825	0.261338	0.261729	0.294918
71.9237	-38.8719	0.282662	0.281911	0.356158	0.260449	0.170645	0.317687	0.26548	0.236514	0.299348	0.26618	0.279517	0.225333	0.285803	0.312508	0.283429	0.267833	0.263507	0.296582
71.921	-38.8768	0.282666	0.290173	0.344495	0.260453	0.170648	0.31769	0.265482	0.236517	0.29935	0.266182	0.279518	0.227419	0.293534	0.312691	0.27959	0.27296	0.263562	0.296617
71.917	-38.884	0.28267	0.302602	0.32696	0.239437	0.177391	0.302761	0.285288	0.236521	0.299355	0.266187	0.279522	0.233685	0.291147	0.312787	0.271749	0.279279	0.266859	0.293538
71.9144	-38.8889	0.282674	0.298456	0.332816	0.218463	0.191052	0.283184	0.285028	0.252255	0.29936	0.266192	0.279526	0.235778	0.288645	0.312788	0.265171	0.281733	0.270101	0.291968
71.9103	-38.8962	0.292622	0.273683	0.350345	0.197515	0.208195	0.268696	0.264902	0.275829	0.299364	0.251473	0.285881	0.23578	0.280968	0.314583	0.258542	0.28286	0.273297	0.288809
71.9063	-38.9035	0.2993	0.261328	0.356181	0.166148	0.228702	0.254198	0.264907	0.267861	0.30533	0.246577	0.288001	0.229518	0.283365	0.310612	0.261055	0.280255	0.269947	0.290287
71.9035	-38.9085	0.299305	0.26133	0.356188	0.155715	0.239028	0.244519	0.264915	0.251943	0.317254	0.256391	0.28378	0.225354	0.283264	0.310532	0.268891	0.275235	0.263391	0.294914
71.8995	-38.9158	0.299309	0.261332	0.356197	0.155719	0.239035	0.244528	0.264926	0.236054	0.329174	0.261311	0.281678	0.219109	0.283118	0.312349	0.280693	0.270285	0.250334	0.302659
71.8968	-38.9207	0.299314	0.261334	0.356206	0.155722	0.239042	0.244536	0.264936	0.236064	0.32919	0.25151	0.285926	0.214953	0.288135	0.312372	0.280714	0.270307	0.24544	0.307324
71.8928	-38.928	0.299318	0.261336	0.356215	0.155726	0.239049	0.244544	0.264946	0.236073	0.335287	0.241806	0.283651	0.219027	0.288152	0.31433	0.271549	0.274043	0.250335	0.299577
71.8901	-38.9329	0.299323	0.261338	0.356222	0.166167	0.235701	0.249514	0.258369	0.236081	0.347479	0.241986	0.279431	0.221119	0.285667	0.320163	0.265077	0.275297	0.258538	0.287223
71.886	-38.9403	0.299327	0.261338	0.356226	0.197544	0.21866	0.279093	0.238703	0.252095	0.341796	0.251976	0.275363	0.225396	0.283331	0.326128	0.259985	0.277888	0.268437	0.279564
71.882	-38.9476	0.299332	0.265455	0.350398	0.239485	0.194775	0.313558	0.232414	0.260391	0.317935	0.266731	0.275609	0.231827	0.281103	0.326372	0.265383	0.280631	0.268585	0.288978
71.8793	-38.9524	0.299336	0.273703	0.338721	0.260511	0.188035	0.318554	0.245953	0.260716	0.300025	0.26673	0.284425	0.234135	0.278805	0.324608	0.270722	0.283319	0.265395	0.296791
71.8752	-38.9597	0.299341	0.281969	0.33914	0.239787	0.188037	0.318554	0.266149	0.285043	0.264172	0.281496	0.284675	0.236391	0.276446	0.322792	0.279991	0.283481	0.26549	0.30152
71.8725	-38.9645	0.299346	0.281969	0.351281	0.219032	0.188039	0.318555	0.26615	0.309109	0.246222	0.291356	0.278214	0.236333	0.278946	0.31889	0.286512	0.282236	0.265492	0.299949
71.8685	-38.9718	0.29935	0.281969	0.357362	0.177147	0.198152	0.303585	0.265798	0.364975	0.204081	0.305846	0.264984	0.240184	0.281287	0.316796	0.286378	0.28214	0.265421	0.295216
71.8658	-38.9766	0.299355	0.277836	0.363223	0.156203	0.204883	0.29363	0.265568	0.388843	0.18599	0.315505	0.251792	0.24612	0.283691	0.316708	0.28105	0.282024	0.26699	0.296721
71.8617	-38.9838	0.299359	0.261337	0.386607	0.156207	0.215319	0.279126	0.265578	0.356648	0.209924	0.30072	0.244999	0.254136	0.288718	0.307035	0.276968	0.281882	0.268548	0.301339
71.8577	-38.9911	0.299364	0.2449	0.409924	0.15621	0.225777	0.274555	0.252381	0.292474	0.257734	0.290882	0.253637	0.25218	0.28623	0.303179	0.278242	0.281882	0.263625	0.298212
71.855	-38.9959	0.299368	0.240802	0.415752	0.156214	0.232761	0.274835	0.245888	0.244692	0.287567	0.290899	0.266839	0.244186	0.281243	0.307084	0.279647	0.280695	0.263685	0.293619
71.8509	-39.0032	0.299373	0.257224	0.392474	0.177167	0.240014	0.270378	0.246225	0.205155	0.299499	0.290911	0.28669	0.236331	0.276403	0.311121	0.285089	0.278333	0.263798	0.292166
71.8482	-39.008	0.299377	0.273714	0.369112	0.198161	0.240275	0.270639	0.239711	0.213197	0.287578	0.295835	0.288982	0.240629	0.271484	0.315082	0.286517	0.278413	0.263843	0.295297
71.8441	-39.0151	0.299382	0.281982	0.357411	0.208676	0.240408	0.270773	0.233083	0.23713	0.275752	0.305807	0.282612	0.246921	0.271636	0.317164	0.283992	0.28101	0.265531	0.301558
71.8414	-39.0199	0.299386	0.281985	0.357421	0.208682	0.240415	0.265781	0.239725	0.237141	0.287924	0.301106	0.278295	0.248978	0.276785	0.313401	0.281381	0.284853	0.263932	0.30472
71.8374	-39.0271	0.299391	0.269594	0.374983	0.208688	0.229918	0.265413	0.239413	0.260807	0.300117	0.286523	0.273819	0.24882	0.279215	0.31334	0.280031	0.283542	0.26227	0.306273
71.8333	-39.0343	0.30944	0.240833	0.398339	0.208693	0.212458	0.274749	0.245829	0.276574	0.300133	0.271754	0.278003	0.240395	0.284097	0.313228	0.283926	0.275875	0.260576	0.306238
71.8306	-39.0392	0.316186	0.224452	0.410001	0.208699	0.205493	0.274491	0.259058	0.276587	0.30015	0.266847	0.280142	0.236223	0.289137	0.313257	0.283953	0.272058	0.262211	0.304702
71.8266	-39.0465	0.316191	0.220365	0.415824	0.208702	0.208981	0.26467	0.265667	0.284586	0.294181	0.266851	0.280146	0.236226	0.299404	0.311502	0.282722	0.266969	0.268761	0.301603
71.8239	-39.0514	0.316196	0.224453	0.41001	0.208705	0.215961	0.25497	0.272394	0.292714	0.282229	0.2767	0.280312	0.234244	0.307167	0.311678	0.281512	0.265735	0.273714	0.298522
71.8199	-39.0587	0.316201	0.236745	0.392532	0.208708	0.222953	0.260199	0.272767	0.285073	0.270269	0.296435	0.282854	0.234519	0.304887	0.317696	0.280395	0.267125	0.283699	0.290873
71.8159	-39.066	0.316206	0.240852	0.386697	0.208712	0.233446	0.260584	0.259649	0.277176	0.270271	0.311262	0.287528	0.236891	0.297506	0.32562	0.281914	0.271113	0.29045	0.287902
71.8132	-39.0709	0.316211	0.240852	0.386701	0.208715	0.240457	0.260833	0.246403	0.27718	0.270274	0.316212	0.289826	0.241199	0.292579	0.327659	0.283316	0.277597	0.287257	0.291067
71.8092	-39.0781	0.316216	0.240853	0.386707	0.208718	0.240462	0.270842	0.233145	0.277185	0.270279	0.311269	0.294177	0.247565	0.290223	0.321951	0.284638	0.287896	0.274164	0.303529
71.8065	-39.0829	0.31622	0.240854	0.386712	0.208721	0.233458	0.280593	0.233149	0.277189	0.270284	0.311273	0.291966	0.247511	0.292745	0.316105	0.284549	0.294265	0.262646	0.311266
71.8025	-39.0901	0.316225	0.240855	0.386719	0.219236	0.219598	0.295196	0.233155	0.277197	0.270291	0.326129	0.278943	0.245246	0.297683	0.308239	0.283059	0.297991	0.254376	0.311176
71.7999	-39.0948	0.31623	0.240857	0.386727	0.240294	0.212848	0.295205	0.233162	0.293234	0.270508	0.336284	0.268214	0.241	0.300102	0.306219	0.282984	0.292796	0.257592	0.30802
71.7958	-39.1019	0.316235	0.240858	0.386732	0.27194	0.202702	0.295209	0.239899	0.309428	0.276917	0.331786	0.266234	0.234817	0.302618	0.304272	0.285592	0.281244	0.265708	0.304855
71.7918	-39.109	0.31624	0.240858	0.386736	0.314228	0.189152	0.295213	0.260136	0.285701	0.295236	0.302353	0.285925	0.23304	0.300322	0.306389	0.291023	0.273708	0.275621	0.298705
71.7892	-39.1137	0.316245	0.240859	0.386741	0.346037	0.178968	0.295218	0.27365	0.269877	0.301356	0.292552	0.296935	0.235357	0.295449	0.310413	0.293818	0.273836	0.28066	0.295687
71.7852	-39.1207	0.31625	0.24086	0.386746	0.367287	0.172169	0.295223	0.29395	0.246129	0.301361	0.292557	0.303601	0.237624	0.290513	0.320245	0.295349	0.28169	0.282493	0.295832
71.7825	-39.1254	0.316255	0.240861	0.386752	0.335426	0.182376	0.305243	0.287445	0.23821	0.295251	0.297416	0.303606	0.237628	0.290516	0.324148	0.296735	0.286892	0.282582	0.299012
71.7785	-39.1325	0.31626	0.240862	0.386759	0.271962	0.202721	0.320301	0.267497	0.238217	0.276942	0.311973	0.296952	0.243786	0.290524	0.324156	0.298067	0.288204	0.284267	0.303726
71.7759	-39.1372	0.316265	0.240863	0.386766	0.271968	0.202725	0.32031	0.267504	0.254265	0.258865	0.321784	0.29039	0.247891	0.290532	0.324166	0.298076	0.285638	0.285902	0.305285
71.7719	-39.1442	0.31627	0.240865	0.386773	0.324849	0.189275	0.315452	0.26751	0.302539	0.222869	0.341646	0.286289	0.250116	0.290698	0.318459	0.298082	0.284356	0.282587	0.30994
71.7679	-39.1513	0.316275	0.240866	0.386779	0.367322	0.186174	0.300842	0.267516	0.342909	0.19284	0.361551	0.284398	0.254505	0.288387	0.316691	0.298173	0.288274	0.274406	0.314633
71.7652	-39.156	0.31628	0.240866	0.386783	0.367327	0.18968	0.295968	0.26752	0.359099	0.19298	0.356824	0.282259	0.258727	0.291067	0.31487	0.300879	0.28963	0.271157	0.319336
71.7612	-39.163	0.316284	0.240867	0.386787	0.335475	0.199886	0.290952	0.274179	0.351005	0.217281	0.337266	0.284402	0.258727	0.301391	0.307235	0.304851	0.288387	0.277771	0.317813
71.7586	-39.1677	0.316289	0.240867	0.386792	0.314294	0.206678	0.280931	0.287484	0.318674	0.241353	0.327325	0.288684	0.258729	0.303974	0.305325	0.304846	0.285805	0.286	0.313142
71.7546	-39.1747	0.323049	0.232695	0.386796	0.314298	0.206681	0.270924	0.30755	0.270477	0.271391	0.317395	0.292961	0.252399	0.311559	0.309218	0.302243	0.279361	0.295846	0.311569
71.7519	-39.1794	0.329845	0.232719	0.375121	0.3143	0.206684	0.270926	0.321118	0.254612	0.271391	0.317394	0.292959	0.248182	0.314021	0.315016	0.299633	0.276772	0.299104	0.311536
71.7479	-39.1865	0.333258	0.24095	0.357566	0.314302	0.206686	0.270927	0.334704	0.238732	0.27139	0.317389	0.292955	0.250284	0.303731	0.326576	0.295722	0.28189	0.29085	0.314603
71.7439	-39.1936	0.333263	0.24095	0.357567	0.314302	0.203183	0.275801	0.334699	0.23873	0.271386	0.317381	0.292946	0.2566	0.29613	0.332408	0.291801	0.290859	0.274378	0.32388
71.7412	-39.1983	0.333269	0.240951	0.369734	0.272323	0.202971	0.285547	0.334703	0.238734	0.271389	0.317383	0.292948	0.258711	0.301342	0.326679	0.291795	0.294712	0.267808	0.325412
71.7372	-39.2054	0.333274	0.240952	0.388026	0.209395	0.206142	0.29528	0.334707	0.238737	0.271393	0.317387	0.292951	0.256603	0.316793	0.311278	0.29038	0.298492	0.264493	0.32224
71.7345	-39.2101	0.333279	0.240954	0.388036	0.2094	0.206148	0.295291	0.321133	0.254626	0.271405	0.317403	0.292965	0.252398	0.319287	0.305406	0.290287	0.298438	0.267763	0.31757
71.7305	-39.2172	0.333285	0.240956	0.388047	0.209406	0.206154	0.295302	0.300806	0.278435	0.253102	0.331989	0.292982	0.248198	0.308859	0.311024	0.29155	0.291992	0.27925	0.306695
71.7279	-39.2219	0.33329	0.240959	0.38806	0.209412	0.206161	0.300324	0.294181	0.278452	0.240929	0.341718	0.297448	0.244114	0.298566	0.320639	0.292942	0.286928	0.282576	0.303642
71.7239	-39.2291	0.333296	0.240961	0.388073	0.241084	0.196008	0.315384	0.274246	0.278469	0.253134	0.332041	0.304145	0.244296	0.283286	0.332262	0.297048	0.280653	0.280989	0.305268
71.7199	-39.2362	0.333301	0.240965	0.388088	0.27284	0.196327	0.305816	0.281154	0.262623	0.271474	0.317499	0.304175	0.24854	0.278268	0.334273	0.302438	0.2808	0.279465	0.305393
71.7172	-39.241	0.329897	0.245067	0.394205	0.283614	0.196547	0.296078	0.294746	0.246761	0.271495	0.317529	0.304206	0.250677	0.280934	0.330514	0.305151	0.284758	0.279595	0.303971
71.7132	-39.2482	0.319727	0.257367	0.412553	0.273499	0.189747	0.311164	0.301949	0.231071	0.277835	0.312905	0.302175	0.254978	0.288856	0.323007	0.302593	0.296409	0.279755	0.300998
71.7105	-39.253	0.316358	0.261467	0.41868	0.284271	0.186444	0.316353	0.302211	0.231256	0.284172	0.30825	0.302344	0.257204	0.294174	0.321265	0.297385	0.304143	0.281467	0.29948
71.7065	-39.2602	0.316363	0.261467	0.418683	0.316208	0.186739	0.301694	0.302211	0.263496	0.278461	0.313536	0.304909	0.257482	0.302192	0.323556	0.287	0.313189	0.284851	0.29954
71.7038	-39.265	0.316368	0.261467	0.418686	0.316211	0.190256	0.296803	0.302213	0.279653	0.27253	0.328593	0.300783	0.257591	0.307472	0.327636	0.281842	0.315795	0.288191	0.301127
71.6998	-39.2721	0.316373	0.261468	0.418689	0.316214	0.190259	0.296806	0.302214	0.271573	0.278567	0.34357	0.294334	0.259706	0.315299	0.327799	0.279282	0.315812	0.293166	0.307393
71.6957	-39.2792	0.316378	0.261469	0.418696	0.316221	0.190263	0.296813	0.302222	0.247376	0.296666	0.343579	0.294341	0.25336	0.320332	0.327762	0.277934	0.315778	0.299783	0.307416
71.693	-39.2839	0.316383	0.261471	0.418705	0.305572	0.193682	0.286759	0.315589	0.239329	0.302702	0.343592	0.294352	0.249139	0.317638	0.329605	0.277893	0.314458	0.303081	0.307423
71.689	-39.291	0.316388	0.261473	0.418714	0.273673	0.203914	0.271703	0.335612	0.247392	0.296686	0.343605	0.294363	0.251263	0.299566	0.331313	0.283077	0.310574	0.306368	0.305859
71.6863	-39.2957	0.316393	0.261474	0.41872	0.263063	0.207322	0.271708	0.342432	0.255564	0.284632	0.343611	0.294368	0.255499	0.286737	0.333138	0.285676	0.309279	0.30469	0.308962
71.6822	-39.3027	0.316398	0.261475	0.418725	0.263067	0.196788	0.296418	0.349563	0.247802	0.272566	0.343615	0.294371	0.259738	0.281666	0.333136	0.287	0.307999	0.299699	0.319876
71.6795	-39.3074	0.316402	0.261476	0.418731	0.263071	0.189781	0.316245	0.343037	0.239827	0.27257	0.343619	0.294374	0.25974	0.286837	0.329306	0.289651	0.305447	0.299689	0.324563
71.6754	-39.3144	0.316407	0.261476	0.418735	0.263075	0.189784	0.336399	0.309469	0.24781	0.272573	0.343621	0.298838	0.255617	0.302366	0.317818	0.292301	0.305475	0.296383	0.330816
71.6714	-39.3214	0.316412	0.261478	0.418742	0.284322	0.182978	0.346502	0.275651	0.271736	0.27258	0.343629	0.305546	0.249433	0.323127	0.308375	0.292389	0.308122	0.289816	0.333967
71.6687	-39.3261	0.316417	0.261479	0.41875	0.305611	0.176162	0.341461	0.275546	0.279711	0.272587	0.343639	0.307789	0.247376	0.336135	0.304672	0.29115	0.30946	0.288202	0.330856
71.6647	-39.333	0.316422	0.261481	0.400403	0.347688	0.183271	0.311688	0.295606	0.279719	0.272595	0.348646	0.312357	0.243307	0.341412	0.30676	0.285956	0.315941	0.286615	0.324635
71.6621	-39.3377	0.316427	0.261482	0.388201	0.368602	0.193816	0.291988	0.315915	0.263788	0.272604	0.358661	0.310301	0.245484	0.331129	0.316485	0.284718	0.318583	0.28336	0.321535
71.6582	-39.3448	0.316432	0.261484	0.406531	0.337239	0.204377	0.287367	0.329855	0.256118	0.254504	0.368688	0.312715	0.247768	0.307967	0.335898	0.282201	0.321241	0.281768	0.320014
71.6543	-39.3518	0.316437	0.261485	0.418782	0.316295	0.19382	0.327302	0.316881	0.248339	0.242428	0.383735	0.308498	0.252071	0.292564	0.34756	0.280957	0.323881	0.283478	0.31537
71.6518	-39.3564	0.316442	0.261487	0.431039	0.295349	0.179777	0.356999	0.310317	0.248437	0.248657	0.384006	0.299714	0.256215	0.295165	0.347617	0.28232	0.32393	0.283509	0.312266
71.6479	-39.3633	0.316447	0.273877	0.431866	0.263871	0.162263	0.386516	0.303619	0.272755	0.248945	0.369342	0.29302	0.262433	0.302972	0.339921	0.287635	0.317543	0.286836	0.310745
71.6454	-39.3678	0.316452	0.282162	0.420118	0.263879	0.162267	0.381469	0.29667	0.296899	0.25519	0.359574	0.288566	0.262339	0.310686	0.332139	0.295566	0.309865	0.290157	0.309219
71.6416	-39.3746	0.316456	0.282165	0.401719	0.295378	0.176287	0.341716	0.296191	0.312671	0.285796	0.324853	0.286045	0.26208	0.318249	0.322283	0.310067	0.29446	0.293436	0.310799
71.639	-39.3791	0.316461	0.28217	0.377246	0.337308	0.183312	0.316826	0.302648	0.304341	0.291668	0.309682	0.29238	0.261999	0.312998	0.322178	0.316692	0.285504	0.293451	0.31399
71.6352	-39.3858	0.319842	0.278061	0.358933	0.368699	0.197378	0.287185	0.302402	0.287919	0.278953	0.314075	0.303148	0.262015	0.302638	0.325955	0.312657	0.285445	0.291761	0.318681
71.6313	-39.3925	0.330029	0.265725	0.365035	0.358245	0.207948	0.287582	0.289154	0.288031	0.272907	0.329039	0.305624	0.264354	0.300282	0.326099	0.296749	0.296894	0.290065	0.320183
71.6288	-39.3969	0.333445	0.261613	0.37726	0.337321	0.207951	0.302721	0.282704	0.304469	0.27331	0.344487	0.301734	0.264634	0.300532	0.330228	0.286283	0.304618	0.290103	0.317062
71.625	-39.4035	0.340274	0.257545	0.402005	0.284916	0.207952	0.317879	0.296721	0.321334	0.274001	0.360341	0.295808	0.267142	0.300917	0.336443	0.281223	0.31248	0.286895	0.317102
71.6224	-39.4079	0.347139	0.257603	0.40251	0.263915	0.207954	0.32294	0.317369	0.30555	0.274197	0.3656	0.29604	0.269432	0.298505	0.340486	0.282662	0.315154	0.285295	0.321825
71.6186	-39.4145	0.350587	0.261768	0.390716	0.295897	0.197705	0.322943	0.33794	0.281483	0.2742	0.36057	0.300448	0.271619	0.293399	0.346387	0.285392	0.319126	0.287033	0.331309
71.616	-39.4189	0.350593	0.26177	0.390724	0.317275	0.190861	0.322953	0.33795	0.281492	0.274209	0.345501	0.304703	0.269441	0.298513	0.34443	0.28804	0.321754	0.285419	0.339208
71.6122	-39.4255	0.350598	0.261772	0.390732	0.317282	0.190865	0.322961	0.324242	0.281282	0.286364	0.325442	0.306626	0.265024	0.311275	0.338535	0.291964	0.323062	0.283779	0.340794
71.6083	-39.4321	0.350604	0.261774	0.39074	0.317289	0.190869	0.32297	0.303715	0.280961	0.292224	0.340285	0.302236	0.256473	0.32404	0.332645	0.29456	0.321758	0.287088	0.336089
71.6058	-39.4364	0.35061	0.261775	0.390747	0.317296	0.190874	0.322979	0.303723	0.280969	0.279898	0.360153	0.297924	0.252233	0.32915	0.330689	0.293209	0.321729	0.288733	0.337664
71.602	-39.443	0.343739	0.269994	0.372343	0.348824	0.190878	0.322988	0.303733	0.280978	0.273747	0.370099	0.295772	0.250119	0.331712	0.334636	0.287946	0.319108	0.290359	0.342375
71.5995	-39.4473	0.336902	0.278213	0.360103	0.369808	0.190882	0.322997	0.303741	0.280986	0.273755	0.370112	0.295781	0.254373	0.326624	0.336616	0.28665	0.316525	0.292007	0.343955
71.5957	-39.4538	0.333499	0.282324	0.360109	0.369815	0.201466	0.308268	0.324287	0.256965	0.273761	0.37012	0.295788	0.265007	0.313875	0.338588	0.285348	0.316526	0.292008	0.343954
71.5932	-39.4582	0.333504	0.282325	0.360114	0.369821	0.205002	0.303356	0.338014	0.240937	0.273766	0.370126	0.295793	0.271395	0.308827	0.340602	0.282738	0.316524	0.292004	0.343947
71.5894	-39.4648	0.333509	0.282327	0.360121	0.369829	0.194418	0.318109	0.338023	0.240943	0.273774	0.375164	0.298121	0.275778	0.306435	0.338772	0.280134	0.316531	0.296997	0.33926
71.5857	-39.4714	0.333515	0.282329	0.360128	0.369838	0.18385	0.332848	0.338034	0.240951	0.273783	0.390284	0.298372	0.271697	0.306498	0.33686	0.280145	0.320439	0.295385	0.336151
71.5832	-39.4757	0.33352	0.282332	0.360136	0.369848	0.176817	0.342668	0.338047	0.240959	0.273793	0.395344	0.296219	0.271709	0.306514	0.33688	0.281491	0.323077	0.290454	0.33618
71.5795	-39.4822	0.343778	0.270008	0.372395	0.37028	0.166457	0.347582	0.338062	0.257195	0.261681	0.395368	0.296235	0.271725	0.306536	0.336908	0.285508	0.323169	0.285536	0.333079
71.577	-39.4866	0.350662	0.261794	0.384678	0.370712	0.166632	0.337795	0.33808	0.273463	0.249559	0.395397	0.296254	0.269612	0.309118	0.336943	0.286869	0.32323	0.280603	0.333118
71.5733	-39.4931	0.350668	0.261796	0.390831	0.37093	0.177293	0.318166	0.344955	0.273584	0.249653	0.375382	0.302761	0.26323	0.316796	0.331049	0.286804	0.323189	0.280583	0.333109
71.5708	-39.4974	0.350674	0.261797	0.390836	0.370935	0.184352	0.308341	0.358703	0.26566	0.255912	0.355502	0.30709	0.261103	0.314134	0.330962	0.286748	0.321842	0.282201	0.333075
71.5671	-39.5039	0.350679	0.261798	0.403131	0.349897	0.194956	0.293583	0.372473	0.274008	0.250025	0.345676	0.307093	0.261105	0.30632	0.338705	0.285438	0.317937	0.283818	0.336188
71.5634	-39.5103	0.361031	0.24952	0.421615	0.318283	0.205578	0.293996	0.352293	0.282169	0.243948	0.35574	0.302775	0.267501	0.301273	0.342698	0.281527	0.317945	0.290469	0.336235
71.5609	-39.5145	0.367977	0.241335	0.421623	0.31829	0.209127	0.299211	0.338828	0.282177	0.243955	0.36582	0.298455	0.273905	0.298829	0.34477	0.278949	0.319274	0.295492	0.336297
71.5572	-39.5209	0.367983	0.241337	0.42163	0.318296	0.198505	0.314012	0.338834	0.282183	0.24396	0.375904	0.300863	0.27408	0.301584	0.342974	0.280355	0.321945	0.303885	0.333245
71.5547	-39.5251	0.364515	0.245431	0.421636	0.318301	0.191439	0.323867	0.33884	0.282188	0.243965	0.385996	0.301028	0.27633	0.299129	0.343061	0.281738	0.3233	0.30893	0.330154
71.551	-39.5315	0.354148	0.257713	0.421643	0.318307	0.191443	0.334025	0.325373	0.265893	0.256135	0.396104	0.296696	0.282745	0.294067	0.347055	0.28448	0.323396	0.315666	0.32394
71.5485	-39.5357	0.350714	0.261808	0.421651	0.318314	0.187912	0.349128	0.29815	0.265703	0.268299	0.396116	0.298952	0.280674	0.299288	0.343206	0.287155	0.323443	0.31737	0.31926
71.5448	-39.5421	0.35072	0.26181	0.421661	0.318322	0.177326	0.368996	0.270841	0.281668	0.274383	0.396132	0.30571	0.272308	0.309688	0.337429	0.287167	0.323459	0.312377	0.317681
71.5411	-39.5485	0.350726	0.261812	0.421672	0.318332	0.173807	0.373929	0.270852	0.28168	0.274396	0.396156	0.307978	0.263837	0.317391	0.337456	0.287189	0.323492	0.30407	0.31925
71.5386	-39.5527	0.350731	0.261815	0.421685	0.318342	0.173812	0.373946	0.277717	0.273666	0.274409	0.396182	0.307997	0.26172	0.319976	0.337487	0.287215	0.32483	0.299118	0.320851
71.5349	-39.5591	0.350737	0.261818	0.421695	0.318351	0.173816	0.37396	0.29832	0.257707	0.268344	0.396202	0.308011	0.261732	0.319995	0.341456	0.284615	0.331364	0.290871	0.32875
71.5325	-39.5634	0.350743	0.26182	0.421706	0.318359	0.173821	0.373974	0.305207	0.265954	0.256195	0.396222	0.308025	0.261745	0.320014	0.345429	0.282014	0.335299	0.285933	0.338242
71.5288	-39.5697	0.34044	0.27415	0.421718	0.318369	0.173825	0.373991	0.298345	0.290325	0.244038	0.396247	0.30354	0.265922	0.320038	0.35139	0.278111	0.332731	0.29427	0.338319
71.5263	-39.574	0.333616	0.28652	0.415824	0.318378	0.177355	0.369086	0.284619	0.30643	0.244047	0.396267	0.299054	0.270094	0.320056	0.355368	0.278174	0.324976	0.307593	0.328922
71.5226	-39.5804	0.333621	0.298998	0.398092	0.318388	0.187953	0.354331	0.270918	0.330699	0.244146	0.396422	0.294654	0.272191	0.325313	0.357473	0.279607	0.31598	0.320976	0.317993
71.519	-39.5868	0.333627	0.303168	0.392177	0.318397	0.198567	0.339553	0.284644	0.339156	0.244417	0.396823	0.283656	0.282776	0.325493	0.35763	0.279697	0.31736	0.321054	0.31491
71.5165	-39.591	0.333632	0.303171	0.392187	0.318406	0.205657	0.329694	0.298393	0.323056	0.250612	0.396971	0.277004	0.291229	0.325617	0.353782	0.281051	0.322615	0.316124	0.316534
71.5128	-39.5975	0.333638	0.303174	0.398359	0.307869	0.209209	0.324765	0.305283	0.290491	0.268906	0.39699	0.274771	0.299745	0.325794	0.342054	0.285002	0.331765	0.307867	0.319729
71.5103	-39.6017	0.333643	0.303175	0.410708	0.28676	0.205666	0.329712	0.305288	0.282338	0.275001	0.396996	0.274775	0.304035	0.320661	0.336122	0.286263	0.33825	0.302882	0.321298
71.5066	-39.6081	0.333648	0.303177	0.42308	0.265622	0.191508	0.339277	0.318798	0.257885	0.293285	0.381822	0.281299	0.299754	0.315327	0.335961	0.286166	0.342091	0.302871	0.319713
71.5028	-39.6146	0.333654	0.303178	0.423085	0.265626	0.177384	0.343731	0.339034	0.241617	0.305462	0.37172	0.290134	0.289173	0.309945	0.337724	0.290068	0.332923	0.309452	0.316514
71.5003	-39.6189	0.333659	0.30318	0.42309	0.26563	0.173862	0.348653	0.339038	0.257892	0.293292	0.371723	0.29688	0.282932	0.307331	0.337677	0.295382	0.323845	0.311065	0.318047
71.4965	-39.6254	0.333664	0.30318	0.423093	0.265633	0.18798	0.349302	0.339602	0.26646	0.262832	0.391937	0.301695	0.278991	0.307521	0.339805	0.302183	0.314889	0.306057	0.322735
71.494	-39.6297	0.340501	0.294937	0.423097	0.265636	0.205679	0.345015	0.347065	0.258789	0.250822	0.407387	0.302085	0.281411	0.310423	0.340085	0.305027	0.308521	0.307748	0.325896
71.4901	-39.6363	0.350818	0.282572	0.423098	0.265638	0.230535	0.335895	0.361623	0.251287	0.251339	0.413229	0.304879	0.286142	0.32138	0.336674	0.30665	0.298304	0.32114	0.329102
71.4875	-39.6408	0.350824	0.282573	0.423101	0.265641	0.241222	0.331237	0.368857	0.24337	0.270141	0.403702	0.307368	0.290659	0.326921	0.334994	0.304128	0.304859	0.31788	0.32913
71.4836	-39.6474	0.35083	0.282573	0.423101	0.265642	0.244789	0.316052	0.382435	0.243369	0.307507	0.368837	0.314069	0.292912	0.332309	0.339124	0.294895	0.334789	0.293028	0.325984
71.4797	-39.6541	0.350835	0.282574	0.423105	0.265646	0.234104	0.310534	0.374878	0.251098	0.313309	0.353297	0.320371	0.284144	0.337201	0.348827	0.28418	0.346382	0.296355	0.322832
71.4771	-39.6586	0.350841	0.27842	0.42904	0.265651	0.219887	0.320152	0.353832	0.266974	0.300542	0.35781	0.320049	0.277492	0.339464	0.352547	0.281415	0.341043	0.309604	0.322812
71.4731	-39.6654	0.350847	0.265983	0.446799	0.265656	0.205701	0.329747	0.319075	0.282581	0.300025	0.36736	0.313036	0.279309	0.331332	0.352215	0.282566	0.340914	0.312867	0.32277
71.4705	-39.6699	0.350853	0.261848	0.452714	0.265661	0.202161	0.344875	0.291827	0.282372	0.306026	0.372309	0.308535	0.283488	0.3261	0.348181	0.286486	0.340905	0.307852	0.324322
71.4665	-39.6768	0.350859	0.26185	0.452722	0.265667	0.20571	0.355243	0.299064	0.266486	0.306249	0.377615	0.30427	0.285693	0.326209	0.340352	0.294459	0.331848	0.307819	0.322722
71.4638	-39.6814	0.350864	0.26185	0.452726	0.26567	0.216353	0.340418	0.333551	0.250651	0.300363	0.387986	0.30007	0.287949	0.326355	0.338484	0.29851	0.328008	0.307819	0.31799
71.4598	-39.6882	0.35087	0.261851	0.452729	0.265673	0.23769	0.31071	0.368143	0.242944	0.282131	0.398254	0.304814	0.288231	0.323977	0.342591	0.299985	0.330717	0.302885	0.314864
71.4557	-39.6951	0.350876	0.261852	0.452735	0.265677	0.237694	0.310715	0.37508	0.267593	0.257674	0.398258	0.316117	0.286369	0.321551	0.34667	0.298765	0.337303	0.299632	0.314905
71.453	-39.6998	0.350882	0.261854	0.452741	0.276401	0.220026	0.330539	0.375084	0.284	0.245437	0.398261	0.320645	0.286481	0.321649	0.346748	0.298809	0.33994	0.299664	0.316495
71.449	-39.7067	0.350887	0.270134	0.440928	0.308627	0.195508	0.350321	0.354313	0.283687	0.2638	0.398267	0.32065	0.292933	0.321799	0.344888	0.298858	0.342585	0.30137	0.3181
71.4462	-39.7113	0.350893	0.278433	0.429095	0.319394	0.192064	0.350328	0.340495	0.283479	0.276033	0.398276	0.320657	0.295089	0.321853	0.344932	0.298885	0.342605	0.301381	0.31968
71.4422	-39.7183	0.350899	0.282591	0.423174	0.3194	0.202711	0.335503	0.347412	0.275405	0.288465	0.388379	0.320663	0.295094	0.329738	0.335149	0.305536	0.338739	0.301379	0.32125
71.4395	-39.723	0.347457	0.286714	0.423181	0.319406	0.213379	0.320655	0.361256	0.259243	0.300916	0.378476	0.320668	0.295098	0.335001	0.329289	0.305512	0.33872	0.303036	0.321246
71.4354	-39.73	0.337173	0.299081	0.423188	0.319412	0.224064	0.305792	0.375123	0.24307	0.307153	0.373527	0.320676	0.292953	0.337587	0.329294	0.301496	0.337364	0.306336	0.321232
71.4312	-39.7372	0.333766	0.303206	0.423197	0.31942	0.227635	0.300838	0.368203	0.275732	0.288796	0.37354	0.313899	0.292793	0.340075	0.327252	0.304113	0.332141	0.306296	0.319635
71.4285	-39.7419	0.333771	0.303208	0.41702	0.330014	0.224075	0.30581	0.354366	0.308347	0.27655	0.373554	0.30939	0.294838	0.337407	0.32719	0.304075	0.330817	0.306279	0.316484
71.4244	-39.7489	0.333776	0.303212	0.398506	0.361743	0.213401	0.320698	0.340559	0.324553	0.276567	0.373584	0.307152	0.290508	0.339919	0.325173	0.30136	0.329477	0.307938	0.310221
71.4217	-39.7536	0.333782	0.303216	0.392352	0.372313	0.209853	0.325663	0.354406	0.324814	0.264327	0.373608	0.302652	0.288265	0.342419	0.325126	0.298659	0.329444	0.309604	0.305529
71.4176	-39.7606	0.344052	0.290853	0.392365	0.372327	0.20986	0.325679	0.375213	0.300515	0.264341	0.368559	0.300338	0.286026	0.337037	0.328921	0.293263	0.331972	0.307923	0.302394
71.4148	-39.7653	0.350945	0.282613	0.392377	0.372341	0.202755	0.335602	0.375235	0.284109	0.270386	0.363401	0.300204	0.285934	0.331711	0.332755	0.29057	0.33325	0.306265	0.300843
71.4107	-39.7722	0.350951	0.282617	0.392391	0.372357	0.192116	0.345355	0.368177	0.275715	0.270126	0.368162	0.297819	0.285789	0.326348	0.336559	0.287863	0.335832	0.302953	0.299302
71.4066	-39.7791	0.350957	0.28262	0.392404	0.372372	0.192123	0.330077	0.367753	0.259045	0.294524	0.373143	0.297841	0.283669	0.321087	0.338457	0.285176	0.339731	0.301324	0.300915
71.4038	-39.7837	0.350963	0.282625	0.392419	0.372389	0.19213	0.325005	0.374547	0.226383	0.319008	0.373178	0.297867	0.283698	0.321128	0.338508	0.282544	0.342378	0.303061	0.304139
71.3997	-39.7905	0.350968	0.282626	0.41094	0.340687	0.192133	0.325007	0.374548	0.201936	0.337341	0.373176	0.297866	0.287984	0.323845	0.33268	0.283869	0.344988	0.308088	0.310449
71.397	-39.7951	0.354418	0.27852	0.423316	0.319518	0.192136	0.32501	0.381472	0.202015	0.331233	0.373175	0.297866	0.292274	0.32919	0.326893	0.28522	0.34762	0.311457	0.316769
71.3928	-39.802	0.364809	0.266201	0.429507	0.319699	0.195786	0.320218	0.395501	0.210401	0.325466	0.368452	0.298019	0.296686	0.337275	0.321222	0.286645	0.351623	0.318227	0.323146
71.3901	-39.8065	0.375253	0.253914	0.441899	0.320058	0.2031	0.315703	0.38905	0.226902	0.325924	0.368904	0.296065	0.299009	0.340104	0.31942	0.290742	0.35173	0.319954	0.329488
71.386	-39.8134	0.392286	0.23349	0.454316	0.320416	0.221143	0.311593	0.369143	0.251746	0.320351	0.37965	0.296591	0.301575	0.340518	0.325654	0.292342	0.353255	0.318408	0.342214
71.382	-39.8203	0.402505	0.221262	0.460528	0.331399	0.221375	0.332362	0.356124	0.260341	0.320905	0.395536	0.303988	0.297904	0.340978	0.337893	0.294033	0.353542	0.321925	0.345511
71.3793	-39.8249	0.40251	0.221263	0.472963	0.331774	0.210873	0.363026	0.33596	0.268764	0.314971	0.411111	0.311179	0.294042	0.341281	0.344085	0.299608	0.352458	0.325402	0.34561
71.3753	-39.8318	0.402514	0.221265	0.485421	0.321314	0.189566	0.408528	0.32952	0.260838	0.321456	0.416616	0.320593	0.292323	0.344277	0.348373	0.310598	0.351459	0.332299	0.341012
71.3727	-39.8363	0.402519	0.221266	0.48543	0.32132	0.175335	0.428415	0.343465	0.24456	0.334015	0.396394	0.327278	0.294546	0.347029	0.350487	0.314738	0.352897	0.337437	0.339513
71.3688	-39.8431	0.399114	0.225345	0.48544	0.321328	0.161135	0.448274	0.343475	0.244568	0.327748	0.375856	0.331443	0.303039	0.349737	0.350576	0.314796	0.360827	0.334166	0.347495
71.365	-39.8497	0.388929	0.237576	0.485449	0.310509	0.16106	0.448078	0.350322	0.244574	0.308949	0.375526	0.333484	0.307258	0.34181	0.354453	0.306701	0.372548	0.324098	0.360172
71.3624	-39.8541	0.385552	0.249921	0.473586	0.288891	0.175083	0.427858	0.36399	0.244577	0.308951	0.375526	0.333483	0.307255	0.331234	0.358272	0.301265	0.376365	0.320687	0.364872
71.3586	-39.8607	0.385558	0.262357	0.455749	0.267314	0.196222	0.392572	0.363554	0.244311	0.308638	0.390482	0.333481	0.300764	0.323168	0.35802	0.301114	0.376226	0.318923	0.366369
71.3561	-39.865	0.385565	0.262359	0.455756	0.245752	0.210264	0.37237	0.363277	0.244136	0.308433	0.400452	0.328934	0.296336	0.322981	0.35587	0.303684	0.372219	0.320537	0.36632
71.3523	-39.8715	0.385571	0.262361	0.437099	0.245367	0.227757	0.347045	0.383725	0.235924	0.295833	0.415408	0.317574	0.296061	0.328016	0.349786	0.30623	0.364259	0.32547	0.361492
71.3497	-39.8758	0.385577	0.262363	0.424693	0.255834	0.231215	0.336807	0.39736	0.219518	0.295644	0.425381	0.308503	0.298003	0.330517	0.347734	0.306169	0.360283	0.328782	0.35513
71.346	-39.8821	0.385583	0.262366	0.424706	0.223621	0.241563	0.326589	0.390091	0.227489	0.295448	0.420044	0.299228	0.301932	0.335566	0.34566	0.303414	0.357593	0.332101	0.347209
71.3422	-39.8883	0.385589	0.262369	0.424717	0.202184	0.248455	0.3266	0.3762	0.243717	0.276763	0.419677	0.301282	0.297521	0.340653	0.343618	0.297993	0.357495	0.330374	0.345598
71.3397	-39.8925	0.385595	0.26237	0.424723	0.180771	0.255339	0.326606	0.362307	0.259948	0.276768	0.409487	0.310194	0.29118	0.337968	0.347512	0.292628	0.36004	0.325307	0.345551
71.336	-39.8986	0.385601	0.262372	0.42473	0.170082	0.25878	0.326612	0.341503	0.284274	0.276773	0.399309	0.321376	0.284891	0.335336	0.349459	0.288607	0.363915	0.313558	0.345487
71.3335	-39.9027	0.385607	0.262373	0.424732	0.19148	0.251908	0.336847	0.327916	0.300705	0.264509	0.399301	0.32137	0.289189	0.332788	0.349477	0.289951	0.362601	0.308507	0.345419
71.3297	-39.9089	0.385613	0.262374	0.424734	0.23437	0.238139	0.352227	0.335237	0.292936	0.252319	0.404508	0.323795	0.291504	0.332972	0.347628	0.296705	0.357464	0.308513	0.340653
71.3272	-39.9129	0.385619	0.262374	0.424736	0.277369	0.224346	0.357355	0.356228	0.260436	0.264774	0.40475	0.326221	0.289507	0.335692	0.347723	0.30078	0.35491	0.31019	0.335898
71.3235	-39.9191	0.385625	0.262376	0.437159	0.320876	0.207163	0.367796	0.370594	0.219803	0.277252	0.415201	0.326546	0.291886	0.335939	0.345926	0.304898	0.355023	0.313598	0.331211
71.3199	-39.9252	0.385631	0.262377	0.45583	0.321408	0.207477	0.358008	0.377721	0.20354	0.289735	0.415459	0.331256	0.292103	0.33877	0.344122	0.302297	0.361598	0.315325	0.328089
71.3174	-39.9294	0.385637	0.262379	0.455839	0.321415	0.211058	0.353032	0.370752	0.21168	0.302241	0.405506	0.333541	0.294324	0.338877	0.346194	0.298344	0.364229	0.317026	0.328115
71.3137	-39.9355	0.385643	0.262381	0.455847	0.310593	0.214532	0.35304	0.34289	0.244206	0.308505	0.400531	0.331272	0.298596	0.336292	0.350178	0.295708	0.364233	0.318705	0.329703
71.3113	-39.9396	0.385649	0.262383	0.455854	0.288972	0.225045	0.348066	0.322042	0.268586	0.314767	0.395558	0.326728	0.30281	0.336297	0.354162	0.293072	0.364234	0.318705	0.329701
71.3076	-39.9458	0.385655	0.262385	0.468318	0.22454	0.249638	0.333109	0.308167	0.284834	0.333566	0.38061	0.322188	0.307022	0.3363	0.360139	0.289115	0.364232	0.317026	0.328112
71.3052	-39.9499	0.385661	0.258236	0.486759	0.181717	0.260143	0.328122	0.308173	0.293068	0.333691	0.375629	0.324466	0.304923	0.336304	0.360141	0.290457	0.362936	0.313671	0.328093
71.3016	-39.9561	0.385667	0.245814	0.510848	0.160317	0.263601	0.328129	0.322062	0.301538	0.31522	0.375636	0.331297	0.298615	0.336309	0.360145	0.294486	0.359053	0.310321	0.329656
71.2952	-39.967	0.385673	0.241684	0.51679	0.16032	0.263606	0.328136	0.342933	0.285378	0.309062	0.375643	0.333579	0.296514	0.344235	0.348318	0.29979	0.357757	0.310318	0.329652
71.291	-39.974	0.385679	0.241685	0.510547	0.170983	0.26361	0.32814	0.342937	0.285382	0.302798	0.380634	0.333581	0.294354	0.352112	0.338443	0.303744	0.35512	0.31531	0.331219
71.2857	-39.9831	0.385685	0.241687	0.491842	0.202925	0.267202	0.323157	0.335986	0.293531	0.284031	0.395601	0.331313	0.289989	0.359901	0.330503	0.309032	0.349885	0.327017	0.334407
71.2821	-39.9892	0.385691	0.241689	0.485626	0.213562	0.27439	0.302903	0.335733	0.301567	0.28395	0.395495	0.328971	0.292052	0.362512	0.324564	0.311665	0.34858	0.332057	0.33602
71.2767	-39.9983	0.385697	0.241692	0.466966	0.245465	0.28159	0.277537	0.328401	0.309374	0.283671	0.395164	0.326476	0.294008	0.35974	0.322467	0.314263	0.347263	0.333743	0.339214
71.2731	-40.0043	0.385703	0.249964	0.44269	0.266703	0.285196	0.27255	0.314549	0.3174	0.277348	0.400049	0.324146	0.293919	0.35174	0.328272	0.314249	0.347278	0.330414	0.340828
71.2676	-40.0134	0.38571	0.262406	0.406246	0.298546	0.29601	0.262668	0.300836	0.325536	0.277363	0.400078	0.321896	0.296041	0.333294	0.341944	0.310249	0.349896	0.327093	0.339283
71.2621	-40.0224	0.385716	0.262409	0.393874	0.352084	0.289254	0.283312	0.280652	0.309311	0.289863	0.395245	0.324266	0.291856	0.32541	0.355772	0.30365	0.352537	0.327141	0.337752
71.2585	-40.0285	0.385722	0.270715	0.381981	0.373706	0.285937	0.30917	0.260521	0.301418	0.296327	0.395618	0.326793	0.28777	0.328154	0.359888	0.298404	0.355193	0.327185	0.337789
71.2529	-40.0378	0.385728	0.283207	0.37028	0.39556	0.286369	0.335414	0.240488	0.301974	0.303097	0.396334	0.331826	0.286035	0.339041	0.356327	0.294565	0.361836	0.32727	0.341
71.2492	-40.044	0.385734	0.283208	0.382674	0.396012	0.28304	0.345915	0.240772	0.302299	0.309685	0.3968	0.336707	0.288509	0.347312	0.35271	0.294728	0.365889	0.325669	0.3442
71.2435	-40.0534	0.38574	0.283209	0.395091	0.374752	0.283044	0.356288	0.261841	0.31113	0.297738	0.4024	0.343968	0.297595	0.345251	0.359102	0.301754	0.36489	0.324147	0.347469
71.2397	-40.0597	0.385746	0.283211	0.395097	0.374757	0.283049	0.351107	0.282663	0.319655	0.279176	0.407534	0.346341	0.304213	0.337539	0.369166	0.309987	0.361153	0.324232	0.34911
71.234	-40.0693	0.385752	0.283213	0.395102	0.374763	0.283054	0.330399	0.310129	0.294785	0.272631	0.407051	0.343728	0.308279	0.332101	0.378965	0.316725	0.359907	0.327619	0.353894
71.2282	-40.0789	0.385758	0.283215	0.395109	0.37477	0.28306	0.309743	0.323595	0.26979	0.278442	0.40146	0.331914	0.305557	0.331591	0.376526	0.316454	0.363656	0.329217	0.364958
71.2243	-40.0854	0.385764	0.283217	0.395116	0.374777	0.283065	0.304591	0.316498	0.277858	0.284615	0.401466	0.322808	0.301007	0.341875	0.366463	0.313594	0.364812	0.327452	0.369653
71.2184	-40.0952	0.38577	0.283218	0.401328	0.364153	0.28307	0.309754	0.30269	0.302546	0.303635	0.402069	0.320922	0.294744	0.373701	0.337063	0.312197	0.362122	0.327392	0.363239
71.2145	-40.1017	0.385776	0.28322	0.413762	0.342874	0.283073	0.320084	0.288992	0.335669	0.304047	0.397416	0.330274	0.295117	0.382037	0.327442	0.31499	0.359583	0.32741	0.355294
71.2086	-40.1116	0.385782	0.283221	0.42622	0.321569	0.283078	0.330431	0.275284	0.385523	0.292058	0.382499	0.344069	0.301996	0.363957	0.345475	0.317957	0.359804	0.327532	0.347448
71.2046	-40.1182	0.385788	0.283223	0.426227	0.321574	0.283084	0.330438	0.27529	0.402187	0.285961	0.377491	0.344074	0.308511	0.345529	0.363298	0.318071	0.365141	0.327612	0.347502
71.1987	-40.1282	0.385794	0.283226	0.426239	0.321584	0.283093	0.320107	0.302948	0.385833	0.285974	0.377512	0.334948	0.306135	0.340019	0.373051	0.314004	0.378264	0.326012	0.355505
71.1927	-40.1381	0.389172	0.279127	0.426247	0.321591	0.283099	0.304628	0.344466	0.336317	0.304581	0.377523	0.325824	0.297258	0.35023	0.366908	0.30981	0.383371	0.322602	0.366579
71.1888	-40.1447	0.395941	0.270925	0.426253	0.321596	0.283104	0.304634	0.344471	0.32802	0.310782	0.377527	0.325827	0.297259	0.35023	0.362911	0.308414	0.38067	0.324225	0.369714
71.1828	-40.1546	0.402735	0.262725	0.426261	0.321603	0.28311	0.304641	0.344479	0.328028	0.310789	0.392918	0.330635	0.297536	0.350483	0.363109	0.30853	0.37286	0.334309	0.363393
71.1789	-40.1611	0.40274	0.262727	0.426269	0.32161	0.283117	0.304648	0.344488	0.328037	0.310798	0.4032	0.333087	0.297704	0.35064	0.367229	0.31404	0.36644	0.337723	0.358678
71.173	-40.171	0.402745	0.262729	0.426278	0.321617	0.283124	0.304657	0.344499	0.328047	0.310807	0.403214	0.335386	0.297767	0.350701	0.367281	0.32352	0.361323	0.332723	0.363467
71.167	-40.1807	0.402749	0.262731	0.426286	0.321624	0.28313	0.314986	0.330797	0.328055	0.310815	0.403223	0.335393	0.297773	0.350707	0.3553	0.324734	0.363875	0.327649	0.371379
71.163	-40.1871	0.402754	0.262733	0.426293	0.32163	0.283136	0.325331	0.317082	0.328062	0.310822	0.403233	0.335401	0.297779	0.350714	0.355305	0.322039	0.363845	0.327632	0.371367
71.1571	-40.1968	0.402759	0.250279	0.462909	0.311317	0.276192	0.330513	0.310224	0.32807	0.310829	0.403242	0.335408	0.304294	0.348213	0.369374	0.316852	0.359985	0.334384	0.365049
71.1531	-40.2032	0.402764	0.242	0.487328	0.311657	0.265621	0.335553	0.310231	0.328078	0.310837	0.403252	0.339991	0.30441	0.353622	0.375538	0.311614	0.362667	0.337803	0.36351
71.1472	-40.213	0.402768	0.242002	0.487338	0.322529	0.251314	0.350643	0.31024	0.328087	0.310846	0.403264	0.346872	0.298066	0.364261	0.379711	0.305007	0.373229	0.332845	0.368336
71.1432	-40.2195	0.402773	0.242004	0.487349	0.322537	0.247717	0.355675	0.31025	0.328099	0.310857	0.40328	0.346885	0.295906	0.364227	0.377686	0.304978	0.379808	0.329524	0.369959
71.1373	-40.2294	0.402778	0.242007	0.506126	0.290469	0.247724	0.355689	0.310262	0.328112	0.31087	0.403301	0.340031	0.295763	0.361441	0.369549	0.310218	0.38373	0.32786	0.369985
71.1314	-40.2394	0.402782	0.242009	0.518677	0.269056	0.244125	0.360728	0.331245	0.303564	0.310884	0.403323	0.335472	0.297842	0.353451	0.363424	0.315482	0.378441	0.332881	0.365228
71.1274	-40.246	0.402787	0.242012	0.518691	0.269063	0.236927	0.370781	0.345264	0.287186	0.310896	0.403342	0.335486	0.297855	0.350816	0.361408	0.316803	0.374495	0.336237	0.362063
71.1216	-40.2558	0.402792	0.242014	0.518705	0.26907	0.229739	0.380824	0.366309	0.262619	0.323519	0.398456	0.335581	0.302264	0.348328	0.361505	0.314169	0.371889	0.336245	0.362084
71.1177	-40.2623	0.402797	0.242016	0.518718	0.269077	0.229745	0.380838	0.380372	0.262805	0.32375	0.398705	0.335754	0.302387	0.351098	0.363641	0.311578	0.369316	0.337959	0.363717
71.1119	-40.2718	0.402801	0.242018	0.518729	0.269083	0.236945	0.38118	0.380675	0.271311	0.31144	0.414275	0.331494	0.298157	0.367055	0.36788	0.309061	0.366789	0.339692	0.368539
71.108	-40.2781	0.402806	0.24202	0.518735	0.269087	0.244155	0.381515	0.380971	0.25489	0.317756	0.419552	0.329357	0.29821	0.375087	0.372029	0.307833	0.366854	0.339722	0.371736
71.1022	-40.2874	0.402811	0.242021	0.512465	0.279805	0.258588	0.376976	0.367329	0.246675	0.336721	0.419904	0.331873	0.300587	0.375324	0.380216	0.309354	0.365659	0.341453	0.374938
71.0964	-40.2967	0.402815	0.250304	0.481765	0.311912	0.27667	0.367379	0.346628	0.246675	0.343048	0.430339	0.338978	0.30307	0.367661	0.382347	0.316191	0.365773	0.343186	0.374949
71.0926	-40.3029	0.40282	0.258606	0.463582	0.322602	0.283921	0.357288	0.346629	0.246678	0.343048	0.430336	0.350464	0.301151	0.359855	0.384376	0.320277	0.367142	0.343212	0.374949
71.0869	-40.3122	0.402825	0.262765	0.457612	0.300882	0.290896	0.357294	0.339603	0.271506	0.330618	0.425176	0.361891	0.299181	0.349349	0.386344	0.321626	0.372424	0.344936	0.371788
71.083	-40.3184	0.40283	0.262767	0.457621	0.279203	0.290613	0.362196	0.332461	0.30459	0.318184	0.414867	0.361736	0.299086	0.346606	0.384231	0.3229	0.375024	0.346623	0.368612
71.0773	-40.3277	0.402834	0.262769	0.45138	0.279069	0.276011	0.371813	0.332093	0.337594	0.293011	0.409378	0.352226	0.303037	0.346343	0.378002	0.325424	0.377575	0.344911	0.3686
71.0735	-40.334	0.402839	0.262773	0.438908	0.300431	0.268801	0.376704	0.324969	0.354055	0.280409	0.409173	0.342912	0.307092	0.348848	0.371919	0.326681	0.378875	0.341559	0.371824
71.0678	-40.3435	0.402844	0.262776	0.426453	0.321763	0.265202	0.381743	0.310976	0.3705	0.28042	0.404044	0.338262	0.306943	0.351381	0.359853	0.331928	0.378836	0.338172	0.3766
71.0621	-40.353	0.402848	0.262778	0.426462	0.321771	0.276036	0.366667	0.310985	0.370512	0.280428	0.404058	0.34974	0.305047	0.343613	0.349905	0.337258	0.378852	0.338186	0.383002
71.0583	-40.3592	0.402853	0.262779	0.426467	0.321775	0.283273	0.356597	0.310988	0.370515	0.280431	0.409206	0.354416	0.307382	0.338478	0.349968	0.337295	0.378864	0.338184	0.389376
71.0526	-40.3686	0.402858	0.262781	0.426472	0.32178	0.283277	0.356602	0.310992	0.370518	0.280434	0.424668	0.350067	0.309612	0.346538	0.350139	0.336049	0.380232	0.338212	0.395782
71.0488	-40.3748	0.402863	0.262783	0.426478	0.34347	0.276328	0.356608	0.317998	0.362309	0.293059	0.419763	0.347854	0.309615	0.35718	0.348279	0.334761	0.380257	0.338221	0.398982
71.0431	-40.3841	0.402867	0.262785	0.426486	0.376084	0.265884	0.356617	0.33904	0.337658	0.31203	0.420129	0.341211	0.309622	0.367843	0.352427	0.333551	0.379023	0.331516	0.402191
71.0393	-40.3903	0.402872	0.262787	0.426495	0.376092	0.26589	0.356626	0.346071	0.312771	0.32449	0.430472	0.341375	0.305382	0.373185	0.356512	0.330941	0.379064	0.328171	0.402202
71.0336	-40.3995	0.402877	0.262789	0.426503	0.3761	0.265896	0.356635	0.360127	0.271403	0.343162	0.430485	0.34828	0.299013	0.37853	0.360599	0.325623	0.380394	0.328187	0.400618
71.0279	-40.4087	0.402881	0.262792	0.426512	0.376109	0.265903	0.356645	0.381247	0.246762	0.343172	0.430499	0.34829	0.299022	0.378542	0.362614	0.3243	0.38437	0.328223	0.395851
71.0241	-40.4148	0.402886	0.262794	0.42652	0.376117	0.265909	0.356654	0.381259	0.246769	0.343183	0.430512	0.348301	0.303385	0.370651	0.364595	0.324309	0.385705	0.331612	0.391086
71.0184	-40.424	0.402891	0.262796	0.426527	0.376124	0.265914	0.356661	0.381265	0.246774	0.330526	0.43544	0.350526	0.309927	0.354805	0.370502	0.322955	0.384361	0.334962	0.391076
71.0146	-40.4301	0.402896	0.262798	0.426536	0.376133	0.265921	0.356672	0.381278	0.246781	0.317892	0.435205	0.354978	0.309938	0.349494	0.374456	0.320261	0.384347	0.33496	0.394285
71.009	-40.4393	0.4029	0.262801	0.44526	0.344115	0.269545	0.351651	0.381297	0.246792	0.311592	0.429947	0.357135	0.307724	0.346768	0.380399	0.316231	0.386989	0.333306	0.397536
71.0052	-40.4454	0.402905	0.262805	0.457777	0.322736	0.276795	0.341584	0.381318	0.246803	0.311609	0.429977	0.352559	0.303282	0.354597	0.378392	0.31622	0.389655	0.329979	0.397595
70.9995	-40.4546	0.40291	0.262807	0.457786	0.322743	0.284052	0.331498	0.381328	0.24681	0.311617	0.42999	0.347973	0.298831	0.365065	0.372381	0.317515	0.392278	0.329986	0.388
70.9939	-40.4637	0.402914	0.262808	0.464042	0.312055	0.29131	0.326595	0.374436	0.255117	0.305406	0.435151	0.348053	0.301059	0.365156	0.368434	0.321563	0.388336	0.336715	0.383199
70.9901	-40.4699	0.402919	0.26281	0.476568	0.301518	0.295092	0.326876	0.374723	0.255303	0.299289	0.440447	0.348215	0.305521	0.36002	0.364492	0.326971	0.3831	0.341768	0.389596
70.9845	-40.479	0.402924	0.275297	0.471168	0.312731	0.288258	0.337418	0.375158	0.247253	0.305807	0.440831	0.346158	0.314351	0.357639	0.354649	0.335095	0.37526	0.350209	0.400824
70.9807	-40.4851	0.402929	0.283646	0.459183	0.323639	0.2884	0.342775	0.375446	0.23911	0.312242	0.441088	0.34402	0.316592	0.36307	0.34878	0.336473	0.375288	0.350223	0.402434
70.975	-40.4943	0.402933	0.287822	0.453194	0.323645	0.299322	0.343214	0.375877	0.239357	0.318881	0.436416	0.346557	0.312443	0.373842	0.344975	0.331138	0.381883	0.345183	0.40403
70.9713	-40.5004	0.402938	0.296186	0.441193	0.323649	0.30297	0.348575	0.376158	0.231203	0.331674	0.4316	0.353624	0.306156	0.379278	0.3451	0.328506	0.38586	0.345206	0.407238
70.9656	-40.5095	0.402943	0.304568	0.42917	0.323653	0.302974	0.359023	0.383519	0.223099	0.344599	0.421718	0.367626	0.300008	0.379511	0.355279	0.324644	0.391237	0.348656	0.408888
70.96	-40.5186	0.402948	0.30457	0.429174	0.323657	0.302978	0.359026	0.383521	0.248124	0.344926	0.406524	0.372244	0.306659	0.371719	0.37341	0.324861	0.391383	0.353798	0.404126
70.9562	-40.5246	0.402952	0.308763	0.423165	0.32366	0.302981	0.359027	0.38352	0.248125	0.344925	0.401341	0.374466	0.311025	0.363777	0.387436	0.329033	0.390159	0.352135	0.402508
70.9506	-40.5338	0.402957	0.321366	0.405099	0.323664	0.302985	0.343369	0.39725	0.256393	0.338562	0.390888	0.378832	0.313158	0.353087	0.401373	0.333151	0.391547	0.347092	0.402491
70.9469	-40.5398	0.402962	0.325578	0.399073	0.32367	0.302992	0.332955	0.396957	0.272922	0.325855	0.395847	0.376445	0.313059	0.350335	0.399246	0.33714	0.392856	0.343711	0.402476
70.9412	-40.5489	0.402966	0.325581	0.399081	0.323678	0.302999	0.317342	0.403602	0.289444	0.300476	0.416084	0.369531	0.308541	0.358121	0.381071	0.342341	0.396734	0.336934	0.404042
70.9356	-40.5579	0.402971	0.325585	0.399091	0.323686	0.303008	0.306956	0.396239	0.314234	0.281484	0.431263	0.362627	0.3084	0.366006	0.361011	0.342137	0.401904	0.335221	0.407239
70.9318	-40.564	0.402976	0.325589	0.399101	0.323695	0.303017	0.306966	0.382138	0.330755	0.281494	0.441638	0.35589	0.310546	0.371367	0.353081	0.338044	0.404507	0.336911	0.410477
70.9262	-40.573	0.402981	0.325589	0.399102	0.323697	0.303018	0.317362	0.36831	0.330751	0.300496	0.447183	0.351582	0.315006	0.379553	0.349278	0.331344	0.403119	0.340226	0.415208
70.9225	-40.5791	0.402985	0.325591	0.399105	0.323699	0.303021	0.327775	0.354476	0.33075	0.319533	0.442357	0.354039	0.317344	0.382402	0.353435	0.328762	0.399182	0.345268	0.413569
70.9168	-40.5881	0.40299	0.338233	0.381004	0.323705	0.306669	0.343562	0.326801	0.330756	0.338604	0.437543	0.358816	0.319744	0.382644	0.361631	0.331659	0.395373	0.348706	0.408807
70.9131	-40.5941	0.402995	0.346685	0.368914	0.323713	0.313972	0.349084	0.306034	0.330766	0.34498	0.432489	0.361138	0.321997	0.3774	0.363655	0.33712	0.396793	0.347082	0.405658
70.9075	-40.6032	0.403	0.346689	0.368923	0.356455	0.310786	0.354613	0.285254	0.330778	0.332268	0.427083	0.367843	0.315443	0.371924	0.363503	0.338386	0.407361	0.342067	0.402491
70.9018	-40.6122	0.403004	0.346694	0.368934	0.378342	0.303784	0.359865	0.278331	0.330796	0.31323	0.431938	0.372325	0.311091	0.366518	0.363402	0.330197	0.415222	0.340395	0.405742
70.8981	-40.6182	0.403009	0.346699	0.368945	0.378355	0.311101	0.349709	0.28538	0.322558	0.313246	0.43715	0.374743	0.311214	0.363968	0.361461	0.330228	0.409968	0.343787	0.410612
70.8924	-40.6272	0.403014	0.346704	0.368955	0.378367	0.322091	0.334443	0.306536	0.297793	0.313261	0.452745	0.375014	0.311386	0.366807	0.359617	0.345251	0.391672	0.350593	0.413913
70.8887	-40.6333	0.403018	0.346709	0.368965	0.37838	0.322102	0.334457	0.313609	0.289542	0.32598	0.442642	0.372723	0.309165	0.380129	0.361759	0.352172	0.38523	0.355752	0.414027
70.883	-40.6423	0.403023	0.346713	0.368974	0.389331	0.318604	0.334469	0.313621	0.289553	0.345083	0.411895	0.372495	0.309028	0.393408	0.367881	0.344143	0.397175	0.354154	0.412509
70.8793	-40.6483	0.403028	0.346716	0.36898	0.411251	0.311588	0.334476	0.313627	0.289559	0.357826	0.412128	0.365731	0.311168	0.393411	0.371908	0.336032	0.40773	0.349101	0.4109
70.8736	-40.6574	0.403033	0.346719	0.368988	0.433213	0.315552	0.319194	0.327756	0.2814	0.370711	0.42806	0.356967	0.30909	0.382746	0.383895	0.334742	0.411754	0.344068	0.414134
70.868	-40.6664	0.403037	0.346721	0.368993	0.433218	0.322896	0.308991	0.348982	0.281687	0.371059	0.418021	0.363985	0.309291	0.366865	0.393893	0.34295	0.402574	0.35253	0.415755
70.8642	-40.6724	0.403042	0.346724	0.368999	0.433226	0.322902	0.308997	0.348988	0.29007	0.377573	0.407861	0.368618	0.311586	0.358977	0.393893	0.34975	0.396006	0.359303	0.417375
70.8586	-40.6815	0.403047	0.346726	0.369004	0.433232	0.322907	0.309001	0.348993	0.290074	0.377577	0.407864	0.373251	0.318262	0.345828	0.399937	0.348446	0.394693	0.36099	0.418969
70.8548	-40.6875	0.403052	0.346728	0.36901	0.433238	0.322913	0.309007	0.348998	0.298454	0.371308	0.407867	0.373254	0.322651	0.345911	0.402025	0.344421	0.397333	0.357601	0.418947
70.8491	-40.6965	0.403056	0.34673	0.369014	0.433243	0.322917	0.30901	0.349001	0.323625	0.352477	0.407867	0.373252	0.327036	0.351338	0.400139	0.34039	0.402615	0.354218	0.415701
70.8454	-40.7025	0.403061	0.346732	0.369018	0.433247	0.322921	0.309013	0.349003	0.332028	0.346196	0.407864	0.377881	0.327137	0.351414	0.402212	0.336356	0.405237	0.357591	0.412462
70.8397	-40.7115	0.403066	0.346734	0.369023	0.433251	0.322925	0.309017	0.349005	0.348838	0.333642	0.41825	0.38268	0.320755	0.362154	0.398339	0.333684	0.410535	0.362688	0.409254
70.834	-40.7205	0.403071	0.346736	0.369029	0.433259	0.322931	0.324723	0.328161	0.374106	0.321179	0.428776	0.382931	0.32091	0.367648	0.39246	0.335081	0.41456	0.364425	0.406073
70.8302	-40.7266	0.403075	0.346739	0.369035	0.433266	0.322938	0.335214	0.314253	0.374112	0.333955	0.429012	0.38078	0.323161	0.367738	0.388492	0.339158	0.415928	0.362752	0.407684
70.8245	-40.7356	0.40308	0.334072	0.387187	0.433275	0.322945	0.335223	0.314261	0.374122	0.346751	0.439675	0.369508	0.325314	0.375791	0.374486	0.351327	0.41867	0.350948	0.412507
70.8207	-40.7416	0.403085	0.325651	0.399265	0.433284	0.322952	0.33523	0.314268	0.37413	0.353154	0.445019	0.362713	0.33186	0.375888	0.366496	0.358096	0.420046	0.340823	0.41892
70.815	-40.7506	0.403089	0.325653	0.399272	0.433291	0.315618	0.345451	0.314274	0.374137	0.372371	0.450604	0.363023	0.329876	0.367973	0.372539	0.360884	0.418783	0.332395	0.425336
70.8112	-40.7566	0.403094	0.325656	0.399278	0.455268	0.301258	0.355661	0.31428	0.374143	0.37879	0.455954	0.37247	0.316994	0.367974	0.384637	0.356921	0.41882	0.33241	0.423732
70.8056	-40.7656	0.403099	0.325658	0.399285	0.488306	0.283369	0.365866	0.314286	0.348886	0.397687	0.461191	0.381857	0.306252	0.367977	0.400796	0.352999	0.412239	0.347624	0.414131
70.7999	-40.7746	0.403104	0.32145	0.40533	0.488317	0.272404	0.370664	0.328211	0.332085	0.410283	0.455975	0.374811	0.314856	0.367987	0.398785	0.357076	0.402976	0.371334	0.40456
70.7961	-40.7806	0.403108	0.313045	0.4174	0.466303	0.275811	0.365284	0.342131	0.332102	0.403886	0.45066	0.372355	0.321319	0.368015	0.390739	0.36248	0.396385	0.381545	0.406235
70.7904	-40.7896	0.403113	0.30466	0.435727	0.422607	0.275423	0.359623	0.369959	0.332127	0.384686	0.445129	0.379048	0.316907	0.367937	0.384646	0.367877	0.385838	0.38838	0.420806
70.7866	-40.7955	0.403118	0.304668	0.448317	0.379169	0.275183	0.359362	0.383899	0.33217	0.371935	0.43976	0.381203	0.312478	0.367861	0.388674	0.365237	0.381984	0.397072	0.425919
70.781	-40.8045	0.403123	0.304675	0.460927	0.324803	0.28573	0.359393	0.383939	0.340612	0.346498	0.434262	0.373968	0.312178	0.370307	0.398667	0.353029	0.381979	0.414264	0.416455
70.7773	-40.8104	0.403127	0.30468	0.467239	0.314054	0.285743	0.359416	0.398155	0.340871	0.327566	0.42377	0.371446	0.312011	0.375543	0.396639	0.346209	0.385936	0.417767	0.408513
70.7716	-40.8193	0.403132	0.304685	0.486171	0.281734	0.289401	0.370057	0.398635	0.349667	0.308818	0.403118	0.375878	0.309798	0.383556	0.378552	0.344735	0.395191	0.397305	0.406943
70.766	-40.8282	0.403137	0.304688	0.505127	0.271236	0.293342	0.386268	0.371065	0.375257	0.309293	0.382875	0.382933	0.3122	0.383804	0.356548	0.351431	0.403169	0.37005	0.411725
70.7623	-40.8341	0.403142	0.304688	0.517776	0.271525	0.297279	0.392004	0.357367	0.375496	0.322279	0.378066	0.387808	0.316826	0.376029	0.356635	0.350107	0.408458	0.366621	0.406806
70.7567	-40.8429	0.403146	0.304688	0.543117	0.272099	0.294184	0.403013	0.343772	0.384327	0.322663	0.399279	0.390778	0.321657	0.36305	0.372923	0.346265	0.417869	0.373494	0.389139
70.753	-40.8488	0.403151	0.304687	0.555805	0.272382	0.287127	0.413547	0.344002	0.384561	0.316425	0.420225	0.388822	0.324026	0.357838	0.385072	0.34774	0.420552	0.381979	0.373052
70.7474	-40.8576	0.403156	0.304694	0.555842	0.250424	0.294199	0.403037	0.386543	0.351197	0.303637	0.446211	0.386796	0.319773	0.360603	0.393303	0.357497	0.420901	0.389075	0.347743
70.7437	-40.8634	0.403161	0.304699	0.555865	0.2285	0.301255	0.387254	0.421858	0.31758	0.290673	0.45624	0.386668	0.315298	0.365847	0.391263	0.36432	0.422348	0.389181	0.336675
70.7381	-40.8722	0.403165	0.304702	0.555882	0.217555	0.304784	0.366235	0.449857	0.292255	0.284037	0.466235	0.384199	0.306369	0.376315	0.389165	0.361529	0.426311	0.3892	0.336698
70.7325	-40.881	0.40317	0.304705	0.555893	0.228511	0.304936	0.361142	0.464185	0.275578	0.303222	0.47186	0.382201	0.30432	0.373726	0.395282	0.352057	0.430288	0.385792	0.344665
70.7288	-40.8868	0.406544	0.300591	0.568611	0.228761	0.305231	0.3667	0.457536	0.275758	0.316227	0.467129	0.384778	0.308916	0.363243	0.401435	0.348067	0.432996	0.382408	0.347866
70.7231	-40.8956	0.416691	0.288243	0.587729	0.218139	0.305528	0.393364	0.41566	0.292757	0.316523	0.462275	0.387287	0.322296	0.35289	0.40569	0.348226	0.434473	0.380791	0.344735
70.7194	-40.9015	0.420087	0.284129	0.587743	0.218144	0.305536	0.409228	0.380308	0.30949	0.316534	0.462293	0.387301	0.328929	0.355715	0.40382	0.349667	0.435895	0.382559	0.338403
70.7138	-40.9104	0.42009	0.296691	0.563281	0.229021	0.305543	0.403951	0.365899	0.334567	0.316541	0.462302	0.382642	0.331042	0.36644	0.403926	0.351095	0.438632	0.387731	0.330477
70.7081	-40.9193	0.420093	0.305089	0.532111	0.261603	0.301873	0.382689	0.400933	0.334569	0.316542	0.446574	0.382403	0.335299	0.369079	0.405939	0.353832	0.43998	0.392859	0.327296
70.7043	-40.9252	0.420097	0.305091	0.525763	0.272452	0.294536	0.38238	0.414933	0.334567	0.31654	0.436096	0.386895	0.335288	0.36906	0.405909	0.356538	0.438613	0.396234	0.328854
70.6986	-40.9342	0.4201	0.305091	0.52576	0.305453	0.276617	0.387325	0.421918	0.33456	0.316532	0.451777	0.387115	0.3288	0.371716	0.403863	0.363327	0.434576	0.396155	0.33356
70.6948	-40.9401	0.420103	0.305091	0.52576	0.327506	0.269547	0.387321	0.42191	0.334555	0.316527	0.462242	0.391925	0.320159	0.379765	0.397843	0.366022	0.435867	0.390972	0.338272
70.6891	-40.949	0.420107	0.305091	0.525756	0.349569	0.255149	0.402791	0.414901	0.334546	0.316518	0.462213	0.398904	0.313667	0.393201	0.3858	0.368681	0.439792	0.373837	0.354093
70.6853	-40.955	0.42011	0.305094	0.525764	0.37168	0.240757	0.423543	0.400908	0.334551	0.316523	0.456975	0.398826	0.315826	0.387806	0.385732	0.370002	0.439764	0.363601	0.366823
70.6796	-40.9639	0.420113	0.305096	0.525775	0.382756	0.233565	0.44449	0.379906	0.33456	0.316531	0.441279	0.39859	0.31569	0.374218	0.393573	0.36856	0.434354	0.363547	0.373187
70.6739	-40.9729	0.420117	0.305101	0.532145	0.371907	0.244541	0.445064	0.358905	0.334581	0.316551	0.436085	0.398541	0.313464	0.360725	0.401485	0.363076	0.430322	0.373759	0.366847
70.6701	-40.9788	0.42012	0.305107	0.544887	0.328057	0.258965	0.440165	0.351918	0.351547	0.303937	0.436134	0.398586	0.313499	0.355405	0.405541	0.36041	0.429072	0.382372	0.36377
70.6644	-40.9877	0.420123	0.313516	0.545557	0.273209	0.273257	0.435088	0.359083	0.368672	0.291397	0.436301	0.398717	0.313584	0.35819	0.405693	0.363262	0.425245	0.394468	0.365529
70.6604	-40.9939	0.420127	0.321943	0.533456	0.273218	0.280601	0.424876	0.373393	0.360434	0.297915	0.441796	0.396656	0.313701	0.360994	0.40584	0.364731	0.4267	0.39628	0.36882
70.6547	-41.0028	0.42013	0.326163	0.527398	0.284244	0.288087	0.409518	0.39487	0.360789	0.298187	0.463145	0.390217	0.311689	0.366507	0.406017	0.364835	0.433462	0.386085	0.376853
70.6509	-41.0087	0.420133	0.326166	0.527407	0.306322	0.288362	0.399275	0.409209	0.35253	0.304705	0.468656	0.388122	0.311787	0.371983	0.404128	0.362159	0.434815	0.379261	0.383262
70.6452	-41.0175	0.420137	0.326171	0.527426	0.328447	0.288641	0.389032	0.423586	0.335767	0.330466	0.448136	0.390488	0.320687	0.374928	0.396254	0.355395	0.430822	0.37757	0.38812
70.6395	-41.0264	0.42014	0.326177	0.527449	0.328461	0.288653	0.389056	0.423617	0.33579	0.349838	0.417008	0.397304	0.325139	0.38046	0.388327	0.355451	0.428241	0.374227	0.380166
70.6357	-41.0323	0.420144	0.326183	0.527475	0.328477	0.284984	0.394219	0.423656	0.335818	0.349871	0.411811	0.39727	0.327342	0.383224	0.386403	0.359631	0.428407	0.372652	0.369063
70.63	-41.0412	0.420147	0.326187	0.527491	0.295324	0.284598	0.409622	0.402147	0.344005	0.362596	0.411834	0.390276	0.327213	0.385822	0.390428	0.369257	0.432574	0.371056	0.353123
70.6262	-41.0471	0.42015	0.326191	0.527506	0.273275	0.288012	0.414762	0.387837	0.343794	0.375314	0.417099	0.385699	0.324969	0.385757	0.39445	0.373399	0.439366	0.371145	0.348391
70.6206	-41.056	0.420154	0.326192	0.527504	0.273276	0.288013	0.414756	0.387829	0.335302	0.381652	0.432833	0.381241	0.327211	0.377711	0.404531	0.369317	0.45273	0.36944	0.34996
70.6168	-41.0619	0.420157	0.326192	0.527504	0.273278	0.288015	0.425337	0.373779	0.335298	0.381644	0.448588	0.383795	0.327394	0.375155	0.408661	0.363892	0.458045	0.369409	0.354715
70.611	-41.0707	0.42016	0.338858	0.528416	0.240621	0.295366	0.430984	0.352689	0.335294	0.381637	0.469633	0.3958	0.325601	0.378168	0.406893	0.365384	0.450036	0.383046	0.3547
70.6053	-41.0796	0.420164	0.347324	0.529017	0.218815	0.306409	0.415572	0.352681	0.335285	0.381622	0.485418	0.400702	0.330245	0.378423	0.411137	0.372363	0.43536	0.412116	0.333935
70.6015	-41.0855	0.420167	0.347326	0.529019	0.218818	0.306412	0.415571	0.359831	0.32691	0.388077	0.485531	0.398424	0.336883	0.367718	0.423291	0.372429	0.430009	0.434432	0.311676
70.5958	-41.0943	0.42017	0.347328	0.516254	0.24063	0.306418	0.420879	0.374293	0.301785	0.407491	0.470078	0.391398	0.350046	0.354345	0.435457	0.367015	0.430004	0.444775	0.291093
70.592	-41.1001	0.420174	0.347334	0.503521	0.262419	0.30643	0.431516	0.367412	0.29342	0.414001	0.464963	0.389088	0.354466	0.359819	0.429503	0.364321	0.435422	0.434539	0.291131
70.5863	-41.1088	0.420177	0.347339	0.497169	0.295367	0.29936	0.442163	0.374853	0.268298	0.433472	0.460069	0.389266	0.350151	0.373356	0.419515	0.362983	0.443516	0.426021	0.297497
70.5825	-41.1146	0.42018	0.347343	0.497181	0.317475	0.292276	0.442178	0.389233	0.251539	0.452971	0.455155	0.391779	0.345875	0.373413	0.417529	0.367116	0.446269	0.429532	0.300705
70.5767	-41.1234	0.420184	0.347346	0.509931	0.339964	0.281764	0.437047	0.410808	0.226402	0.472487	0.46078	0.394436	0.341682	0.365421	0.419562	0.376743	0.447706	0.427856	0.303893
70.571	-41.1322	0.420187	0.347347	0.529089	0.351585	0.278597	0.426927	0.425357	0.201253	0.498534	0.4718	0.392535	0.346356	0.36297	0.417691	0.385057	0.445104	0.410641	0.307023
70.5672	-41.138	0.42019	0.347345	0.541859	0.35195	0.27516	0.432391	0.425625	0.201373	0.49878	0.482573	0.390447	0.350908	0.373925	0.411777	0.386456	0.442352	0.408796	0.300594
70.5615	-41.1469	0.420194	0.351577	0.554968	0.330226	0.278971	0.432715	0.425888	0.209953	0.479585	0.493112	0.390552	0.357632	0.38489	0.418075	0.382455	0.43559	0.425825	0.291039
70.5577	-41.1528	0.420197	0.360057	0.542772	0.330223	0.286358	0.42239	0.425866	0.20995	0.479546	0.487765	0.392794	0.359819	0.382163	0.428193	0.381091	0.430148	0.441158	0.292563
70.552	-41.1617	0.41007	0.381057	0.530567	0.296897	0.300752	0.41723	0.425861	0.20995	0.473018	0.477046	0.394905	0.359705	0.376646	0.43619	0.382429	0.423412	0.456572	0.300444
70.5482	-41.1676	0.403351	0.389393	0.524168	0.285678	0.315271	0.406924	0.411445	0.235212	0.453631	0.482106	0.392482	0.359604	0.371153	0.43809	0.382364	0.422023	0.458244	0.302005
70.5425	-41.1765	0.413449	0.376897	0.504991	0.31848	0.326395	0.391443	0.389858	0.285856	0.421523	0.492456	0.390142	0.35289	0.368299	0.429764	0.384944	0.420601	0.453004	0.306717
70.5367	-41.1853	0.42021	0.368567	0.498614	0.340493	0.322843	0.375508	0.411045	0.29436	0.415154	0.492462	0.390146	0.34845	0.370924	0.415467	0.386159	0.417835	0.449474	0.311424
70.5329	-41.1912	0.420214	0.36857	0.498624	0.362709	0.315728	0.364906	0.425163	0.294367	0.415164	0.492475	0.390156	0.348457	0.370931	0.40937	0.384734	0.417792	0.447727	0.309827
70.5272	-41.2	0.420217	0.368576	0.498641	0.396098	0.305041	0.364924	0.439596	0.277574	0.428183	0.482172	0.39488	0.350805	0.362976	0.411452	0.379307	0.416485	0.442615	0.309851
70.5233	-41.2059	0.420221	0.368582	0.511434	0.396521	0.297912	0.36494	0.454049	0.26077	0.441216	0.471855	0.399604	0.350926	0.357675	0.417598	0.375282	0.4152	0.439229	0.308294
70.5176	-41.2147	0.420224	0.368587	0.530658	0.385977	0.287065	0.370121	0.461297	0.25237	0.447755	0.461421	0.404256	0.348775	0.365811	0.419775	0.369905	0.415254	0.434134	0.305155
70.5118	-41.2235	0.420227	0.368592	0.530675	0.38599	0.275968	0.385614	0.461322	0.243892	0.454168	0.445598	0.411101	0.346574	0.373917	0.415802	0.36994	0.415305	0.432478	0.302021
70.508	-41.2293	0.420231	0.3686	0.530701	0.38601	0.264888	0.401108	0.45414	0.235354	0.466986	0.44037	0.408718	0.34652	0.373896	0.415819	0.369977	0.415393	0.436052	0.300518
70.5022	-41.2382	0.420234	0.368609	0.517918	0.40796	0.253826	0.416591	0.432541	0.23515	0.479674	0.445603	0.401721	0.34198	0.373767	0.415753	0.368598	0.415452	0.446535	0.300612
70.4984	-41.2441	0.426996	0.360306	0.505158	0.429892	0.25384	0.416632	0.425385	0.226625	0.479472	0.456022	0.397084	0.341942	0.373768	0.415802	0.368666	0.415588	0.450198	0.303898
70.4926	-41.2529	0.437098	0.347841	0.498783	0.452016	0.257655	0.406349	0.43261	0.218244	0.466468	0.476969	0.390208	0.353024	0.360421	0.419877	0.370083	0.418326	0.446817	0.311868
70.4888	-41.2587	0.4371	0.347839	0.505164	0.463424	0.265282	0.385716	0.45423	0.226918	0.440926	0.487512	0.392671	0.357585	0.349746	0.423903	0.371432	0.422263	0.443237	0.314963
70.483	-41.2676	0.437102	0.34784	0.524359	0.45293	0.272936	0.370363	0.490549	0.235837	0.39625	0.503382	0.404638	0.351283	0.358008	0.420034	0.374242	0.42496	0.441477	0.318108
70.4773	-41.2764	0.437105	0.347843	0.530777	0.419574	0.257884	0.417307	0.483815	0.235989	0.383491	0.519311	0.411943	0.333768	0.387731	0.414199	0.372978	0.423677	0.439773	0.314936
70.4735	-41.2823	0.437107	0.347854	0.518005	0.396854	0.250066	0.453605	0.447837	0.252723	0.396326	0.530063	0.40276	0.324859	0.401181	0.422495	0.369056	0.421229	0.436601	0.313506
70.4677	-41.2912	0.437109	0.347865	0.498859	0.351771	0.267685	0.463959	0.382964	0.302999	0.428552	0.551755	0.360922	0.326608	0.398119	0.43658	0.366358	0.421369	0.433381	0.310464
70.4639	-41.297	0.437111	0.347875	0.505286	0.329759	0.289703	0.443601	0.361561	0.336899	0.428876	0.573507	0.333222	0.333053	0.387255	0.434453	0.370472	0.422862	0.433619	0.309015
70.4581	-41.3058	0.430405	0.356195	0.530914	0.34157	0.301511	0.418286	0.397971	0.312176	0.422992	0.600904	0.331446	0.333462	0.379488	0.414229	0.380064	0.418929	0.43716	0.309068
70.4543	-41.3117	0.423642	0.364511	0.550172	0.342101	0.29079	0.423627	0.441526	0.270139	0.429755	0.590598	0.359728	0.329607	0.37992	0.402305	0.382898	0.413614	0.440603	0.312244
70.4486	-41.3204	0.420271	0.368666	0.563015	0.297838	0.286819	0.439116	0.448747	0.253158	0.455722	0.537414	0.392228	0.34102	0.383037	0.404646	0.378926	0.413596	0.44048	0.318534
70.4428	-41.329	0.420274	0.368667	0.563014	0.29784	0.286821	0.439111	0.405327	0.278217	0.501126	0.468634	0.391556	0.36065	0.374859	0.427008	0.372142	0.424301	0.440472	0.321705
70.4389	-41.3348	0.413531	0.377004	0.56302	0.342423	0.283637	0.42361	0.398108	0.30369	0.50141	0.447612	0.391405	0.360544	0.363923	0.432935	0.376202	0.428298	0.443912	0.321696
70.4331	-41.3434	0.40346	0.389511	0.563027	0.387157	0.287865	0.392394	0.441348	0.312716	0.462897	0.490128	0.387277	0.354144	0.364031	0.422792	0.387179	0.425666	0.445646	0.321697
70.4293	-41.3492	0.403465	0.393779	0.556925	0.387163	0.291588	0.37656	0.477289	0.304452	0.450055	0.516792	0.387632	0.354382	0.375069	0.418975	0.390059	0.420385	0.442194	0.320097
70.4235	-41.358	0.40347	0.406605	0.525722	0.386783	0.28762	0.381458	0.49148	0.278829	0.469329	0.511465	0.394649	0.358948	0.388822	0.425395	0.391661	0.415165	0.438793	0.31534
70.4197	-41.3638	0.403474	0.410895	0.506778	0.375232	0.290954	0.391817	0.476996	0.261623	0.481928	0.505929	0.396817	0.358875	0.39422	0.429535	0.3945	0.419289	0.437179	0.316992
70.414	-41.3726	0.403479	0.410902	0.500388	0.341616	0.305261	0.375873	0.483796	0.252962	0.48156	0.500286	0.394194	0.349736	0.402067	0.425304	0.393024	0.438082	0.432113	0.325025
70.4082	-41.3814	0.403484	0.410909	0.500406	0.330501	0.316264	0.354929	0.5125	0.253131	0.468775	0.500327	0.391865	0.3408	0.388301	0.427087	0.381864	0.452771	0.428698	0.329843
70.4044	-41.3873	0.403489	0.410912	0.513237	0.330842	0.320276	0.344723	0.519951	0.270335	0.449669	0.505781	0.394373	0.338713	0.382945	0.429131	0.374985	0.451359	0.432108	0.334617
70.3986	-41.3961	0.403494	0.410913	0.55181	0.320675	0.317275	0.339936	0.527746	0.287766	0.437304	0.522251	0.401959	0.341387	0.394233	0.423424	0.37103	0.443321	0.435513	0.344181
70.3948	-41.402	0.410205	0.40255	0.564696	0.320989	0.310104	0.355889	0.520978	0.28793	0.444071	0.527925	0.40459	0.346051	0.399909	0.423627	0.373877	0.439301	0.430247	0.342502
70.389	-41.4108	0.420311	0.390013	0.545378	0.36523	0.287918	0.408486	0.478186	0.287852	0.463627	0.506808	0.402088	0.345921	0.399799	0.435845	0.373936	0.437998	0.426812	0.329722
70.3851	-41.4166	0.423685	0.385849	0.519682	0.409245	0.273079	0.445259	0.442364	0.279142	0.469828	0.490605	0.399385	0.338974	0.399472	0.439706	0.371095	0.440641	0.430287	0.324963
70.3793	-41.4253	0.433831	0.373345	0.500453	0.408624	0.26902	0.487411	0.37773	0.270194	0.47562	0.468775	0.401099	0.338626	0.396449	0.433296	0.375043	0.435189	0.433701	0.332938
70.3735	-41.434	0.43715	0.369179	0.513289	0.342026	0.290748	0.48244	0.356185	0.253008	0.468553	0.489491	0.403396	0.356476	0.377755	0.429249	0.383312	0.420487	0.428497	0.352126
70.3697	-41.4398	0.437152	0.369182	0.526142	0.297794	0.312743	0.461719	0.363412	0.244582	0.455482	0.521193	0.4037	0.363376	0.369864	0.431418	0.386155	0.415185	0.419866	0.364942
70.3639	-41.4485	0.437155	0.369182	0.532571	0.275688	0.323747	0.445975	0.39945	0.244876	0.403762	0.552654	0.406191	0.350093	0.386027	0.43966	0.38761	0.415199	0.407762	0.374508
70.36	-41.4544	0.437157	0.369184	0.532575	0.286811	0.312747	0.445632	0.435424	0.253634	0.371642	0.552503	0.403745	0.336608	0.402012	0.445717	0.391738	0.417881	0.402584	0.374466
70.3542	-41.4631	0.433842	0.373357	0.532587	0.320238	0.298318	0.434773	0.493127	0.254026	0.365658	0.558392	0.394682	0.336662	0.402068	0.445765	0.402824	0.423367	0.394086	0.376119
70.3503	-41.4689	0.42708	0.381699	0.545454	0.331737	0.298723	0.40855	0.521941	0.254182	0.38541	0.55906	0.397401	0.348088	0.38889	0.441839	0.40703	0.427448	0.390682	0.37451
70.3445	-41.4776	0.420342	0.390041	0.564788	0.354616	0.299399	0.371945	0.536163	0.245633	0.444137	0.554733	0.402631	0.359675	0.381232	0.442152	0.401664	0.430164	0.400992	0.353645
70.3387	-41.4864	0.420345	0.390042	0.558342	0.399296	0.27745	0.387512	0.521572	0.236955	0.469973	0.560203	0.398032	0.364141	0.386733	0.448406	0.389316	0.430093	0.42504	0.320097
70.3348	-41.4922	0.416978	0.394227	0.545471	0.421353	0.262597	0.408244	0.492463	0.262277	0.463296	0.54389	0.397685	0.36615	0.389315	0.44832	0.38651	0.430045	0.425014	0.318495
70.329	-41.501	0.406907	0.406772	0.53262	0.443383	0.262603	0.413588	0.463583	0.2962	0.450332	0.517066	0.397255	0.370339	0.389165	0.442038	0.389149	0.428644	0.404304	0.34716
70.3252	-41.5068	0.403565	0.410952	0.545475	0.421357	0.281177	0.39835	0.471132	0.305019	0.444252	0.50138	0.406676	0.374974	0.378461	0.442022	0.391872	0.425892	0.399042	0.359861
70.3194	-41.5155	0.40357	0.410951	0.577699	0.366215	0.307272	0.383345	0.493586	0.314249	0.438628	0.464833	0.439798	0.38011	0.370831	0.44441	0.394814	0.416581	0.404145	0.364616
70.3155	-41.5213	0.403575	0.41095	0.590613	0.344131	0.311007	0.388833	0.501193	0.30593	0.445414	0.454475	0.454095	0.375932	0.381863	0.446675	0.396307	0.411253	0.409247	0.362961
70.3097	-41.53	0.403579	0.410959	0.597109	0.333093	0.303554	0.415332	0.472555	0.305859	0.45848	0.481277	0.438003	0.366955	0.400826	0.44887	0.397813	0.412727	0.41799	0.355082
70.3039	-41.5386	0.403584	0.410967	0.597137	0.333107	0.292384	0.452428	0.400435	0.33107	0.458148	0.513049	0.412184	0.362144	0.405956	0.444595	0.394948	0.422086	0.430142	0.343978
70.3001	-41.5444	0.403589	0.410977	0.597171	0.333124	0.292398	0.463216	0.371712	0.339484	0.451512	0.528931	0.402836	0.364292	0.400495	0.442517	0.392189	0.42751	0.430279	0.345681
70.2943	-41.553	0.403594	0.419549	0.584905	0.333128	0.296128	0.468778	0.371948	0.348284	0.438741	0.550474	0.400816	0.375675	0.379008	0.448682	0.386704	0.431498	0.41989	0.360045
70.2905	-41.5588	0.410294	0.419756	0.572614	0.333129	0.303588	0.458358	0.393718	0.357202	0.439192	0.556324	0.401152	0.382628	0.368366	0.459035	0.384046	0.428812	0.421558	0.361596
70.2847	-41.5674	0.420382	0.411474	0.566462	0.333132	0.311059	0.447932	0.430084	0.340497	0.452697	0.546183	0.406093	0.382851	0.365792	0.46941	0.388299	0.419481	0.43532	0.34557
70.2789	-41.5761	0.420385	0.411476	0.566468	0.333136	0.311064	0.431806	0.4807	0.306446	0.426392	0.54032	0.410479	0.371478	0.3764	0.467202	0.397872	0.416789	0.438735	0.327992
70.2751	-41.5818	0.420389	0.415767	0.560327	0.333142	0.311069	0.415709	0.509449	0.280741	0.413052	0.545186	0.407892	0.360086	0.389689	0.458835	0.403256	0.419414	0.430067	0.326363
70.2693	-41.5905	0.420392	0.428661	0.541864	0.333151	0.311078	0.399641	0.508966	0.280511	0.432408	0.555935	0.398576	0.353297	0.400422	0.444449	0.40314	0.428756	0.416309	0.332735
70.2654	-41.5962	0.420396	0.432971	0.542168	0.322111	0.318557	0.383887	0.501513	0.297514	0.458694	0.5672	0.391894	0.357917	0.397895	0.444579	0.396306	0.434126	0.41289	0.340722
70.2596	-41.6048	0.42713	0.411696	0.580093	0.322584	0.318987	0.368257	0.501518	0.3147	0.485293	0.584128	0.39013	0.371734	0.387499	0.457208	0.386892	0.430174	0.418069	0.353523
70.2557	-41.6106	0.433886	0.394765	0.598896	0.356483	0.304569	0.378971	0.487264	0.331916	0.485563	0.579013	0.394952	0.383111	0.376877	0.461453	0.392519	0.420881	0.423257	0.358347
70.2499	-41.6193	0.437205	0.390587	0.598908	0.390305	0.289994	0.405647	0.458722	0.340538	0.485702	0.54148	0.406418	0.389816	0.374224	0.46149	0.403605	0.410242	0.426714	0.363166
70.2441	-41.628	0.430512	0.386123	0.597924	0.423573	0.278786	0.437414	0.430019	0.340444	0.472395	0.557249	0.399302	0.380684	0.379436	0.471634	0.398068	0.410198	0.426682	0.364749
70.2402	-41.6339	0.423774	0.377401	0.609545	0.423155	0.282288	0.448023	0.40106	0.348768	0.459002	0.578289	0.396949	0.36719	0.379212	0.481755	0.391151	0.414188	0.424979	0.364771
70.2344	-41.6426	0.420416	0.360289	0.627234	0.400256	0.292995	0.453268	0.357536	0.356763	0.465004	0.556334	0.403548	0.355797	0.376179	0.485607	0.388308	0.420878	0.421609	0.360028
70.2305	-41.6484	0.420419	0.351809	0.626571	0.399881	0.292754	0.463738	0.335845	0.347884	0.477717	0.534728	0.407927	0.355677	0.373395	0.479404	0.38829	0.427678	0.418335	0.353758
70.2247	-41.657	0.410349	0.360048	0.626251	0.388473	0.28133	0.473652	0.342779	0.339119	0.483957	0.529198	0.405387	0.362258	0.37614	0.460966	0.390986	0.435797	0.415015	0.350652
70.2208	-41.6628	0.403666	0.372623	0.626649	0.399928	0.274149	0.462948	0.371536	0.330777	0.490742	0.534896	0.396185	0.37124	0.381779	0.453023	0.392499	0.435988	0.41521	0.354015
70.2149	-41.6715	0.393658	0.402215	0.621632	0.400551	0.293179	0.421341	0.429671	0.305818	0.484882	0.55158	0.387236	0.380416	0.387559	0.447223	0.395459	0.429466	0.415368	0.365395
70.2091	-41.6801	0.387017	0.43203	0.591016	0.36681	0.315235	0.405713	0.466169	0.314889	0.465915	0.557406	0.389915	0.382949	0.379634	0.439152	0.394125	0.430889	0.410285	0.379986
70.2053	-41.6858	0.387023	0.444947	0.559675	0.34402	0.310946	0.431816	0.444299	0.3577	0.459599	0.536045	0.401604	0.376325	0.374169	0.434989	0.392694	0.433576	0.40514	0.389715
70.1996	-41.6943	0.387029	0.462204	0.502815	0.331982	0.306402	0.457482	0.400371	0.46047	0.420542	0.503587	0.405765	0.367043	0.37379	0.436705	0.399422	0.424036	0.399834	0.402542
70.1958	-41.6999	0.397003	0.458217	0.477622	0.331648	0.309846	0.451926	0.392846	0.503389	0.394444	0.497971	0.386564	0.375468	0.3735	0.444648	0.404845	0.411851	0.399686	0.402396
70.1902	-41.7081	0.427154	0.424682	0.47786	0.342976	0.310112	0.436125	0.392668	0.494464	0.400744	0.503094	0.365226	0.392853	0.367904	0.452577	0.412978	0.395584	0.394213	0.392345
70.1865	-41.7136	0.443721	0.403708	0.490718	0.354501	0.314248	0.420659	0.400015	0.460039	0.420179	0.513828	0.372455	0.393085	0.359873	0.454572	0.41705	0.388786	0.385433	0.390482
70.1809	-41.7217	0.453473	0.391133	0.52294	0.344157	0.322269	0.405457	0.414883	0.408748	0.466029	0.519767	0.391775	0.380262	0.362779	0.452615	0.415609	0.389961	0.37152	0.401434
70.1754	-41.7298	0.443732	0.399408	0.561477	0.300112	0.329914	0.405938	0.415333	0.357365	0.511887	0.520299	0.403954	0.36278	0.376477	0.456999	0.406143	0.395409	0.371645	0.41612
70.1718	-41.7352	0.43055	0.407586	0.586811	0.277976	0.322443	0.427166	0.401096	0.340184	0.505068	0.530773	0.406314	0.356108	0.379167	0.463228	0.397963	0.396823	0.382026	0.419549
70.1664	-41.7431	0.420463	0.411585	0.586205	0.277721	0.314713	0.453475	0.372212	0.339929	0.445503	0.567033	0.403677	0.351446	0.387177	0.459153	0.385571	0.399558	0.409688	0.403679
70.1628	-41.7484	0.423824	0.407414	0.566818	0.277325	0.318049	0.458568	0.350376	0.339559	0.43854	0.561114	0.403323	0.346763	0.39789	0.450943	0.380036	0.399601	0.430546	0.387736
70.1575	-41.7564	0.43393	0.394874	0.534549	0.287822	0.310044	0.473718	0.328359	0.347562	0.464262	0.518216	0.400375	0.335201	0.41925	0.438529	0.375796	0.396917	0.451466	0.378236
70.1539	-41.7617	0.437248	0.390695	0.515223	0.287387	0.305918	0.47838	0.320821	0.347141	0.490051	0.491504	0.400028	0.323831	0.432513	0.432229	0.375674	0.394169	0.456635	0.379845
70.1485	-41.7696	0.430562	0.39907	0.502372	0.264834	0.312804	0.467299	0.327624	0.321164	0.528736	0.459544	0.404352	0.305871	0.442975	0.432042	0.378351	0.384799	0.463609	0.384743
70.1431	-41.7776	0.417121	0.428721	0.490366	0.220518	0.330973	0.44088	0.34897	0.295567	0.541558	0.470176	0.395035	0.305798	0.440224	0.432048	0.383929	0.376917	0.467307	0.389783
70.1395	-41.7829	0.410425	0.450078	0.491204	0.187552	0.345885	0.414791	0.363325	0.287149	0.535049	0.502178	0.383625	0.312517	0.434987	0.42808	0.390932	0.370385	0.47275	0.389958
70.1341	-41.7909	0.403752	0.471486	0.517895	0.143735	0.357571	0.388937	0.392406	0.270516	0.52233	0.555898	0.363113	0.328214	0.424446	0.422079	0.403446	0.36114	0.481524	0.385135
70.1304	-41.7962	0.403756	0.475829	0.537641	0.132894	0.361803	0.384179	0.407336	0.270932	0.516479	0.583363	0.34952	0.339525	0.4166	0.422249	0.409109	0.3559	0.485096	0.381947
70.125	-41.8043	0.410438	0.467393	0.563638	0.144298	0.362622	0.395652	0.415572	0.271598	0.524225	0.584589	0.352442	0.348942	0.400764	0.432777	0.413523	0.345373	0.488664	0.385223
70.1213	-41.8097	0.41714	0.454626	0.569833	0.188947	0.34825	0.422553	0.408959	0.280499	0.531527	0.558343	0.373816	0.342651	0.392797	0.445199	0.413646	0.340075	0.488583	0.388392
70.1157	-41.8178	0.427215	0.429069	0.555925	0.2892	0.326357	0.44921	0.402076	0.289273	0.551878	0.494462	0.416205	0.331972	0.387612	0.472214	0.40287	0.340179	0.483446	0.393309
70.1102	-41.8259	0.437268	0.412183	0.516809	0.332981	0.318455	0.459181	0.401703	0.271855	0.577734	0.435435	0.441539	0.336438	0.398626	0.48693	0.390622	0.34425	0.485342	0.395032
70.1065	-41.8314	0.43727	0.420775	0.510907	0.299545	0.314435	0.47481	0.372577	0.305842	0.564403	0.419194	0.438721	0.345115	0.412177	0.482779	0.386394	0.350823	0.48342	0.398136
70.1009	-41.8396	0.447013	0.43833	0.545319	0.177948	0.325778	0.475497	0.322204	0.452133	0.506675	0.387633	0.431448	0.34937	0.425703	0.47652	0.377969	0.362667	0.481425	0.404423
70.0971	-41.8451	0.453516	0.451512	0.55986	0.156051	0.334003	0.455081	0.307997	0.539238	0.49476	0.351095	0.438684	0.340587	0.431144	0.476493	0.368244	0.37054	0.481215	0.409116
70.0915	-41.8533	0.453518	0.473201	0.548284	0.246253	0.335595	0.397406	0.344277	0.548783	0.548759	0.309564	0.455811	0.327677	0.420431	0.482742	0.35725	0.379835	0.479411	0.412298
70.0878	-41.8588	0.453521	0.477549	0.528964	0.27987	0.350832	0.349567	0.409306	0.488429	0.595217	0.304562	0.458491	0.332343	0.406967	0.484809	0.355871	0.383806	0.479325	0.412214
70.0821	-41.8671	0.453523	0.468847	0.508835	0.267934	0.372542	0.311939	0.503229	0.384847	0.61423	0.341592	0.442019	0.356837	0.396203	0.488874	0.358589	0.386373	0.477309	0.413577
70.0765	-41.8753	0.453525	0.455836	0.508001	0.278781	0.35713	0.332669	0.539493	0.341854	0.593795	0.383849	0.423135	0.36779	0.404322	0.499159	0.362745	0.38366	0.47885	0.41501
70.0727	-41.8809	0.453528	0.455835	0.507999	0.301274	0.34238	0.353865	0.52515	0.341846	0.593755	0.399865	0.418569	0.356581	0.420548	0.511566	0.36143	0.380979	0.483967	0.414921
70.067	-41.8892	0.45353	0.45584	0.534029	0.324458	0.328197	0.370266	0.511324	0.324854	0.620632	0.40031	0.423696	0.332222	0.43958	0.530339	0.360222	0.375737	0.492726	0.418203
70.0632	-41.8947	0.453532	0.460164	0.553878	0.325064	0.328747	0.365406	0.519107	0.307908	0.640909	0.389978	0.428611	0.327891	0.439585	0.530239	0.36567	0.368978	0.499397	0.422825
70.0575	-41.903	0.453535	0.473177	0.548224	0.336698	0.348053	0.344885	0.534438	0.299767	0.634941	0.390273	0.431235	0.337017	0.428892	0.519889	0.371105	0.360911	0.513088	0.430746
70.0518	-41.9113	0.453537	0.477528	0.541985	0.336704	0.366998	0.323937	0.541978	0.325925	0.60225	0.395635	0.431308	0.359508	0.412867	0.509679	0.365577	0.356874	0.519988	0.443683
70.048	-41.9169	0.45354	0.477528	0.528919	0.359049	0.370791	0.318661	0.541959	0.351951	0.582597	0.384906	0.43591	0.37073	0.410268	0.501454	0.358638	0.355447	0.521547	0.451665
70.0423	-41.9252	0.453542	0.473179	0.515603	0.36984	0.370478	0.318429	0.541591	0.3952	0.542912	0.384647	0.438042	0.370612	0.432065	0.499481	0.344886	0.348697	0.519554	0.459599
70.0384	-41.9308	0.456796	0.460284	0.528097	0.347217	0.37018	0.318213	0.541283	0.412407	0.529621	0.384503	0.435545	0.361517	0.456544	0.507884	0.335372	0.343421	0.510911	0.461284
70.0327	-41.9391	0.466573	0.438982	0.540566	0.313316	0.365938	0.323135	0.540784	0.412073	0.52924	0.384272	0.428194	0.347805	0.475304	0.5264	0.329935	0.334149	0.496964	0.454748
70.0289	-41.9447	0.469842	0.434772	0.540579	0.290757	0.365638	0.322906	0.540456	0.420554	0.509161	0.405335	0.416313	0.347604	0.458619	0.542664	0.334032	0.326211	0.489996	0.444992
70.0233	-41.953	0.469844	0.434777	0.521048	0.27909	0.368792	0.317198	0.55446	0.411627	0.502151	0.426393	0.406818	0.351921	0.414726	0.560746	0.343549	0.312971	0.477776	0.438444
70.0176	-41.9613	0.469847	0.434783	0.501556	0.289938	0.364713	0.322218	0.54678	0.393927	0.508167	0.436744	0.411447	0.35866	0.376656	0.556227	0.351647	0.302366	0.460389	0.451355
70.0138	-41.9668	0.46985	0.434794	0.488592	0.300905	0.35704	0.337966	0.539509	0.367845	0.514348	0.436509	0.416041	0.365398	0.363174	0.541747	0.355714	0.298422	0.446672	0.467746
70.0081	-41.9751	0.469852	0.434813	0.475663	0.289394	0.341577	0.358545	0.546431	0.341746	0.513811	0.420086	0.413191	0.376317	0.360438	0.523208	0.357046	0.298459	0.429665	0.490967
70.0043	-41.9806	0.469855	0.434829	0.475699	0.278194	0.333954	0.363537	0.546173	0.332951	0.520155	0.398632	0.405727	0.384962	0.363094	0.51502	0.358442	0.299841	0.419552	0.497882
69.9986	-41.9888	0.469858	0.434845	0.488706	0.256043	0.34899	0.342682	0.53894	0.307015	0.546254	0.366736	0.398269	0.3891	0.3684	0.510928	0.362606	0.298599	0.409429	0.494938
69.9948	-41.9943	0.46986	0.434847	0.501704	0.233852	0.375334	0.306049	0.524271	0.315459	0.559375	0.34023	0.409812	0.375664	0.379101	0.512913	0.363956	0.297259	0.405924	0.493182
69.9892	-42.0025	0.469863	0.43485	0.508219	0.22275	0.397994	0.26389	0.516625	0.358306	0.619618	0.256222	0.449777	0.34037	0.403509	0.521376	0.36409	0.292041	0.407672	0.496486
69.9835	-42.0106	0.469865	0.426223	0.507697	0.244968	0.360275	0.30031	0.560098	0.375967	0.607176	0.298733	0.443617	0.327324	0.411873	0.540402	0.364385	0.286928	0.418247	0.500122
69.9798	-42.016	0.469868	0.4219	0.500903	0.267143	0.33023	0.342047	0.582	0.376238	0.55413	0.394179	0.408805	0.342829	0.403713	0.546392	0.368428	0.288171	0.424868	0.499644
69.9742	-42.0241	0.469871	0.430551	0.488508	0.278384	0.352928	0.321598	0.597444	0.376868	0.521713	0.410368	0.397239	0.372023	0.3879	0.540702	0.381117	0.29766	0.427112	0.495401
69.9704	-42.0295	0.469873	0.439187	0.495515	0.278789	0.387344	0.274746	0.605316	0.368583	0.542003	0.373418	0.41374	0.374488	0.388055	0.536576	0.38245	0.308196	0.421783	0.488517
69.9648	-42.0376	0.469876	0.456535	0.516212	0.268492	0.414992	0.233122	0.599145	0.377791	0.603132	0.347887	0.428853	0.352828	0.415857	0.537558	0.377406	0.320457	0.408581	0.482742
69.9611	-42.043	0.469879	0.473906	0.510785	0.268872	0.41171	0.24401	0.577729	0.386588	0.636981	0.359083	0.424699	0.337354	0.443281	0.541953	0.374738	0.320471	0.401623	0.480941
69.9555	-42.0512	0.469881	0.500066	0.479682	0.280307	0.389239	0.286605	0.54893	0.377874	0.643512	0.423561	0.399238	0.326148	0.487183	0.546444	0.372111	0.313872	0.406756	0.482496
69.9499	-42.0593	0.469884	0.517592	0.45455	0.280324	0.366513	0.318261	0.541652	0.360433	0.589489	0.465751	0.384813	0.334834	0.489892	0.554912	0.373631	0.311338	0.424276	0.489483
69.9462	-42.0647	0.469887	0.5132	0.460834	0.269011	0.354996	0.328533	0.541236	0.351514	0.562208	0.454204	0.388936	0.354687	0.453971	0.562652	0.376178	0.311191	0.43785	0.495705
69.9406	-42.0727	0.469889	0.482618	0.504803	0.23515	0.343211	0.333172	0.540322	0.350992	0.568108	0.426929	0.388297	0.394723	0.377448	0.5639	0.378608	0.316309	0.44973	0.510253
69.9368	-42.0781	0.469892	0.460885	0.523059	0.234941	0.335398	0.332695	0.539665	0.367935	0.58122	0.432332	0.381273	0.414964	0.334083	0.55951	0.379893	0.31894	0.453266	0.513694
69.9312	-42.0861	0.469894	0.430588	0.54067	0.245741	0.327459	0.342812	0.53919	0.384975	0.58782	0.443121	0.39095	0.415332	0.312538	0.553318	0.379893	0.31631	0.460324	0.500686
69.9275	-42.0915	0.469897	0.417654	0.546295	0.256758	0.319807	0.358494	0.539171	0.384966	0.574433	0.437539	0.409768	0.399741	0.331498	0.55341	0.378531	0.312316	0.461958	0.484085
69.9219	-42.0995	0.4699	0.41336	0.520007	0.312349	0.312325	0.385067	0.525097	0.367781	0.527744	0.442203	0.421238	0.383923	0.383135	0.560203	0.378816	0.305856	0.448306	0.466272
69.9163	-42.1076	0.469902	0.413378	0.507068	0.334575	0.32361	0.417869	0.482661	0.307568	0.500782	0.446881	0.404177	0.387879	0.421225	0.560604	0.380413	0.308678	0.427855	0.469975
69.9125	-42.113	0.469905	0.41768	0.507338	0.346008	0.331412	0.434682	0.447014	0.264593	0.506974	0.446641	0.385013	0.398592	0.429194	0.545766	0.382976	0.317858	0.422499	0.474673
69.907	-42.121	0.469908	0.430631	0.521195	0.346879	0.339682	0.430422	0.425852	0.247591	0.540344	0.447277	0.366483	0.405285	0.423791	0.518733	0.382819	0.3311	0.431227	0.483027
69.9032	-42.1264	0.46991	0.434957	0.547572	0.313762	0.347538	0.409361	0.433196	0.290797	0.561186	0.448166	0.369427	0.399037	0.415822	0.510534	0.377262	0.329728	0.445065	0.489601
69.8976	-42.1344	0.469913	0.447933	0.548462	0.291568	0.347683	0.393252	0.447582	0.386166	0.569415	0.443911	0.398654	0.382068	0.399856	0.523205	0.367715	0.312445	0.465773	0.496034
69.8938	-42.1398	0.469915	0.456613	0.516365	0.325089	0.336354	0.387435	0.476396	0.438468	0.543534	0.444117	0.417906	0.375764	0.391891	0.540047	0.36236	0.299253	0.47627	0.497755
69.8882	-42.1478	0.469918	0.456613	0.483779	0.380837	0.3175	0.381328	0.519532	0.438454	0.503449	0.454291	0.419992	0.380118	0.394561	0.558752	0.35828	0.287337	0.481363	0.499252
69.8825	-42.1559	0.469921	0.456608	0.49028	0.347046	0.328524	0.35991	0.541048	0.342706	0.561967	0.448669	0.403046	0.386369	0.394244	0.575055	0.352677	0.281962	0.481084	0.507189
69.8787	-42.1613	0.469923	0.45662	0.516382	0.268593	0.354513	0.349692	0.526736	0.264904	0.640916	0.443636	0.398467	0.386424	0.383357	0.58135	0.345824	0.279336	0.488204	0.509061
69.873	-42.1695	0.469926	0.447968	0.555096	0.167682	0.387789	0.361036	0.461647	0.195924	0.746722	0.444223	0.40368	0.380103	0.364478	0.577437	0.344542	0.272821	0.504371	0.501351
69.8692	-42.175	0.469929	0.43932	0.55452	0.156317	0.391084	0.36619	0.432212	0.195661	0.766055	0.460252	0.396626	0.375541	0.369867	0.569109	0.348666	0.272842	0.504505	0.49655
69.8634	-42.1832	0.469931	0.426366	0.521046	0.189293	0.37516	0.348872	0.459818	0.229448	0.731734	0.475588	0.384371	0.368331	0.396845	0.556578	0.343076	0.29796	0.467958	0.503347
69.8596	-42.1887	0.469934	0.417763	0.494548	0.233475	0.356067	0.342662	0.480611	0.263423	0.684855	0.480318	0.386414	0.359189	0.410395	0.550554	0.330722	0.328623	0.435347	0.508958
69.8538	-42.1969	0.469936	0.400563	0.474095	0.310978	0.322346	0.357584	0.472437	0.348818	0.592005	0.479269	0.385768	0.356547	0.40185	0.550344	0.318241	0.368748	0.413107	0.491172
69.8481	-42.2052	0.469939	0.391985	0.480048	0.355723	0.304078	0.368023	0.457889	0.417718	0.526428	0.457395	0.38288	0.3719	0.363494	0.554021	0.324994	0.374092	0.434055	0.456576
69.8443	-42.2106	0.469942	0.391985	0.49945	0.367529	0.300869	0.373799	0.443914	0.443977	0.500527	0.446748	0.387539	0.380926	0.344534	0.547576	0.335935	0.359293	0.460106	0.436723
69.8386	-42.2188	0.47648	0.39217	0.538918	0.346372	0.320413	0.369945	0.423388	0.462195	0.481638	0.441862	0.397278	0.378975	0.358286	0.524691	0.352357	0.335095	0.484066	0.418232
69.8347	-42.2242	0.483034	0.396651	0.559329	0.313439	0.339669	0.365599	0.409692	0.480233	0.482404	0.437086	0.399987	0.363448	0.382763	0.520543	0.357833	0.327015	0.48366	0.416244
69.829	-42.2324	0.486317	0.413969	0.567407	0.28036	0.351461	0.371807	0.410605	0.481215	0.516575	0.43285	0.393595	0.33458	0.398991	0.543465	0.357985	0.324428	0.478423	0.421112
69.8232	-42.2407	0.48632	0.431242	0.548962	0.280495	0.351609	0.371934	0.440034	0.464384	0.557051	0.428266	0.382187	0.321222	0.385147	0.553492	0.360651	0.321698	0.48349	0.437294
69.8193	-42.2462	0.486323	0.435579	0.529638	0.302866	0.351624	0.361144	0.469141	0.447203	0.577206	0.428574	0.375264	0.327974	0.366176	0.543005	0.363335	0.316368	0.488778	0.455389
69.8136	-42.2544	0.486326	0.435584	0.510057	0.33637	0.351633	0.334184	0.49778	0.42963	0.5835	0.428408	0.379914	0.334719	0.366292	0.511919	0.364555	0.31098	0.48519	0.483315
69.8097	-42.26	0.486329	0.435594	0.516606	0.325224	0.35165	0.323432	0.497505	0.4207	0.569728	0.42799	0.386772	0.33018	0.393541	0.501832	0.360478	0.313674	0.474835	0.490058
69.8039	-42.2683	0.486332	0.435578	0.536173	0.291692	0.351621	0.301888	0.504081	0.420249	0.515703	0.437607	0.395576	0.327627	0.431478	0.53291	0.344014	0.320193	0.451739	0.481157
69.8	-42.2738	0.486335	0.426923	0.555221	0.269193	0.347685	0.290933	0.503393	0.428432	0.488692	0.458357	0.395335	0.340917	0.428787	0.559954	0.340007	0.322874	0.437779	0.474396
69.7941	-42.2822	0.486337	0.405355	0.566775	0.257517	0.339533	0.295635	0.502518	0.427768	0.527847	0.45303	0.376285	0.36744	0.404186	0.559575	0.364712	0.32022	0.425516	0.470845
69.7882	-42.2906	0.48634	0.388183	0.546045	0.267927	0.331168	0.300122	0.530733	0.392804	0.607016	0.421443	0.354992	0.369341	0.398565	0.561679	0.374474	0.31774	0.418975	0.47138
69.7843	-42.2961	0.486343	0.379626	0.519527	0.300874	0.323265	0.304942	0.559487	0.34966	0.626557	0.416052	0.347829	0.360241	0.403894	0.587038	0.354025	0.319241	0.421169	0.467139
69.7784	-42.3045	0.486346	0.37107	0.499525	0.356313	0.308282	0.320476	0.58132	0.289518	0.57904	0.441746	0.352139	0.346573	0.406207	0.630778	0.315506	0.317789	0.441931	0.455633
69.7744	-42.31	0.486349	0.366789	0.525151	0.356858	0.308686	0.320843	0.589219	0.272632	0.526142	0.457178	0.359021	0.33983	0.403297	0.645186	0.301729	0.316342	0.457411	0.458751
69.7685	-42.3184	0.486352	0.353973	0.621835	0.324964	0.321186	0.300862	0.590728	0.307773	0.501147	0.436516	0.363976	0.335581	0.389719	0.640684	0.303004	0.316237	0.469383	0.484842
69.7645	-42.3239	0.486355	0.336925	0.679288	0.325722	0.333202	0.301715	0.570067	0.351536	0.515687	0.410779	0.364374	0.335831	0.378973	0.629981	0.311141	0.317478	0.470853	0.499333
69.7585	-42.3322	0.486358	0.311473	0.722784	0.359922	0.348912	0.318747	0.542395	0.387036	0.510346	0.427661	0.362748	0.338502	0.371135	0.617373	0.31931	0.322697	0.463551	0.508712
69.7525	-42.3404	0.48636	0.33266	0.691993	0.35993	0.356512	0.329781	0.543094	0.404935	0.504434	0.460461	0.361053	0.341179	0.374254	0.611579	0.326308	0.322811	0.461913	0.512076
69.7485	-42.346	0.486363	0.362484	0.648638	0.337209	0.3524	0.334797	0.55744	0.404884	0.531069	0.455369	0.361174	0.345723	0.385242	0.603226	0.330386	0.321406	0.466834	0.510001
69.7426	-42.3544	0.486366	0.375319	0.63	0.303179	0.340594	0.323288	0.585471	0.395693	0.557079	0.444447	0.363333	0.359064	0.398982	0.586633	0.338589	0.316066	0.477059	0.509736
69.7386	-42.36	0.486369	0.349672	0.667247	0.280555	0.336541	0.312205	0.584572	0.403869	0.543202	0.443925	0.365368	0.365612	0.401691	0.582524	0.342729	0.312134	0.478896	0.514821
69.7326	-42.3685	0.486372	0.324184	0.704292	0.280561	0.332773	0.301367	0.569292	0.394596	0.522408	0.464571	0.357944	0.365247	0.398659	0.57801	0.343964	0.310732	0.470108	0.531242
69.7286	-42.3742	0.486375	0.336928	0.685801	0.28057	0.340337	0.296241	0.562151	0.377241	0.522174	0.475157	0.350853	0.3584	0.395732	0.571556	0.341102	0.313319	0.463156	0.544518
69.7227	-42.3829	0.486378	0.362508	0.655251	0.280714	0.351851	0.307434	0.56328	0.343165	0.522488	0.475406	0.348631	0.347268	0.390167	0.558931	0.332721	0.317198	0.461423	0.55789
69.7167	-42.3914	0.486381	0.345396	0.69975	0.281114	0.352291	0.329307	0.579275	0.309248	0.543103	0.460002	0.353638	0.343048	0.384824	0.552625	0.320274	0.31704	0.46114	0.560808
69.7128	-42.3971	0.486384	0.324171	0.737192	0.281254	0.352449	0.34023	0.579842	0.318194	0.55036	0.455107	0.358637	0.34556	0.385089	0.548741	0.31348	0.318374	0.455964	0.560829
69.7068	-42.4055	0.486386	0.345439	0.706294	0.281259	0.352455	0.356441	0.572986	0.35321	0.537791	0.455492	0.368387	0.352636	0.385475	0.549109	0.310861	0.31711	0.445597	0.560782
69.7029	-42.4111	0.486389	0.33692	0.712089	0.292472	0.344871	0.366992	0.565555	0.379274	0.524646	0.450073	0.375444	0.359441	0.38561	0.549186	0.315003	0.311828	0.443776	0.560584
69.6969	-42.4195	0.486392	0.311491	0.716236	0.348464	0.325946	0.371715	0.542643	0.430884	0.49776	0.449562	0.377478	0.36822	0.388286	0.542842	0.33279	0.298623	0.450535	0.558657
69.6929	-42.4251	0.486395	0.324206	0.671659	0.37049	0.321919	0.371352	0.505395	0.456189	0.497257	0.44918	0.377237	0.368082	0.38823	0.549175	0.342525	0.289527	0.459499	0.555885
69.687	-42.4333	0.486398	0.366804	0.583816	0.369812	0.321407	0.365479	0.446078	0.489501	0.502942	0.448555	0.374465	0.358822	0.387953	0.574175	0.339953	0.284397	0.480866	NaN
69.6811	-42.4414	0.486401	0.405453	0.521374	0.347017	0.328552	0.349234	0.438257	0.471421	0.515437	0.448145	0.362339	0.349465	0.384803	0.592661	0.335837	0.289708	0.496852	NaN
69.6771	-42.4469	0.486404	0.422693	0.496398	0.335701	0.339701	0.333335	0.467274	0.44563	0.508674	0.44795	0.352731	0.349152	0.370853	0.60234	0.332872	0.297455	0.501625	NaN
69.6712	-42.4551	0.486407	0.435662	0.497181	0.313568	0.354952	0.307056	0.540577	0.394621	0.502478	0.448191	0.343411	0.351296	0.346315	0.614279	0.329998	0.309239	0.501376	NaN
69.6672	-42.4606	0.486409	0.435666	0.516773	0.302709	0.355265	0.301912	0.562856	0.377666	0.516056	0.448585	0.33892	0.355868	0.33288	0.618408	0.33276	0.311906	0.49965	NaN
69.6612	-42.4689	0.486412	0.435649	0.53634	0.291814	0.35175	0.312736	0.548519	0.386395	0.522816	0.448738	0.346105	0.360499	0.314031	0.624152	0.343623	0.307819	0.490365	NaN
69.6572	-42.4745	0.486415	0.431316	0.54913	0.269307	0.351592	0.323369	0.541278	0.386366	0.522753	0.448685	0.355544	0.356147	0.316747	0.624043	0.355971	0.301216	0.481469	NaN
69.6512	-42.4829	0.486418	0.418344	0.554739	0.246458	0.354745	0.339111	0.519106	0.394658	0.515697	0.464395	0.3602	0.351649	0.341017	0.61768	0.372404	0.290626	0.472373	NaN
69.6452	-42.4913	0.486421	0.414016	0.528275	0.257115	0.365419	0.328186	0.525804	0.359644	0.541302	0.474769	0.360089	0.351512	0.373415	0.605068	0.380491	0.283924	0.470057	NaN
69.6412	-42.497	0.486424	0.414017	0.515247	0.268124	0.37281	0.312202	0.540117	0.342327	0.567601	0.474956	0.360201	0.351584	0.395225	0.5929	0.376371	0.285216	0.473424	NaN
69.6352	-42.5054	0.486427	0.414022	0.515261	0.301916	0.377092	0.2912	0.54014	0.385653	0.581695	0.459557	0.36757	0.349668	0.420018	0.576885	0.359959	0.293093	0.482109	NaN
69.6312	-42.5111	0.486429	0.422654	0.515839	0.336113	0.370338	0.29152	0.526019	0.43795	0.569405	0.443939	0.379582	0.345513	0.428451	0.571012	0.358681	0.290514	0.489122	NaN
69.6252	-42.5195	0.486432	0.444299	0.517266	0.382378	0.345203	0.329432	0.50555	0.473732	0.550868	0.433914	0.394245	0.343805	0.418027	0.567336	0.382309	0.274956	0.489527	NaN
69.6191	-42.528	0.486435	0.453002	0.517885	0.371417	0.341596	0.361901	0.536153	0.431393	0.545057	0.423647	0.406435	0.339731	0.402019	0.56779	0.40749	0.271276	0.479837	NaN
69.6151	-42.5336	0.486438	0.435692	0.529952	0.337038	0.352307	0.361734	0.565641	0.405535	0.538531	0.434459	0.404262	0.337634	0.394057	0.572527	0.417634	0.275506	0.477318	NaN
69.609	-42.5421	0.486441	0.418428	0.535378	0.291334	0.366415	0.334399	0.586497	0.387585	0.544424	0.46637	0.387647	0.323956	0.393726	0.582818	0.426067	0.278243	0.482923	NaN
69.605	-42.5477	0.486444	0.431386	0.529707	0.280314	0.366572	0.318364	0.578711	0.387251	0.557372	0.471651	0.378099	0.31258	0.398831	0.584556	0.42731	0.275541	0.491488	NaN
69.5989	-42.5562	0.486447	0.453068	0.550801	0.270062	0.367669	0.32458	0.543241	0.405043	0.558105	0.461361	0.371156	0.319314	0.385301	0.572003	0.423037	0.274172	0.503698	NaN
69.5948	-42.5618	0.48645	0.461764	0.564562	0.270569	0.372107	0.335993	0.537034	0.423248	0.539084	0.445643	0.376054	0.339678	0.363922	0.555526	0.416045	0.278091	0.508937	NaN
69.5887	-42.5703	0.486452	0.461761	0.571137	0.259327	0.368292	0.346699	0.559394	0.414923	0.539424	0.424282	0.3855	0.369036	0.358923	0.524663	0.402041	0.291178	0.508717	NaN
69.5825	-42.5788	0.486455	0.444399	0.556791	0.235985	0.363276	0.329392	0.579493	0.387717	0.578093	0.418395	0.387464	0.348526	0.424167	0.506321	0.393756	0.303074	0.498336	NaN
69.5784	-42.5845	0.486458	0.427108	0.536046	0.246492	0.366181	0.318095	0.563618	0.378115	0.590294	0.423229	0.387149	0.319191	0.473159	0.514987	0.391303	0.299312	0.488496	NaN
69.5723	-42.5929	0.486461	0.414163	0.515632	0.279558	0.380855	0.312842	0.541541	0.308382	0.581997	0.465202	0.37501	0.307669	0.486351	0.548081	0.39422	0.27161	0.47276	NaN
69.5682	-42.5986	0.486464	0.422785	0.516164	0.302406	0.385292	0.324159	0.535309	0.282874	0.562292	0.481284	0.365627	0.318757	0.461564	0.570593	NaN	NaN	0.468871	NaN
69.5621	-42.6071	0.486467	0.435761	0.536622	0.325965	0.371379	0.346264	0.544014	0.344434	0.531026	0.44999	0.361152	0.343506	0.418131	0.595468	NaN	NaN	0.477383	NaN
69.558	-42.6128	0.48647	0.427132	0.542667	0.325837	0.359881	0.33501	0.580203	0.379362	0.538329	0.423563	0.363598	0.363891	0.399528	0.604539	NaN	NaN	0.479814	NaN
69.5518	-42.6213	0.486473	0.39696	0.547209	0.324942	0.336312	0.322858	0.570311	0.369109	0.569809	0.438871	0.367963	0.384032	0.391593	0.619754	NaN	NaN	0.447209	NaN
69.5457	-42.6299	0.486475	0.375502	0.591367	0.302636	0.317461	0.35986	0.475094	0.324661	0.587437	0.45372	0.369697	0.37682	0.404843	0.636255	NaN	NaN	0.410737	NaN
69.5416	-42.6355	0.486478	0.362667	0.649306	0.258217	0.321515	0.376468	0.446689	0.307588	0.587481	0.432257	0.37421	0.361005	0.412762	0.644541	NaN	NaN	0.400455	NaN
69.5353	-42.6443	0.486481	0.345596	0.70697	0.224834	0.348267	0.350681	0.491345	0.308477	0.568925	0.400686	0.381395	0.336477	0.406978	0.650418	NaN	NaN	0.400416	NaN
69.5312	-42.6499	0.486484	0.337081	0.712777	0.213419	0.363132	0.34013	0.535591	0.317695	0.556538	0.401113	0.381725	0.325474	0.396013	0.650202	NaN	NaN	0.407279	NaN
69.5251	-42.6583	0.486487	0.320091	0.698087	0.246698	0.366457	0.33449	0.572031	0.352673	0.530611	0.433558	0.379866	0.316794	0.38518	0.648027	NaN	NaN	0.415871	NaN
69.521	-42.6639	0.48649	0.31162	0.677713	0.30253	0.355107	0.328755	0.57872	0.378522	0.510594	0.465641	0.377698	0.319132	0.385318	0.644015	NaN	NaN	0.414173	NaN
69.5149	-42.6723	0.486493	0.311618	0.638534	0.403381	0.325314	0.328131	0.555599	0.403761	0.509894	0.486664	0.384741	0.323662	0.390868	0.644035	NaN	NaN	0.391566	NaN
69.5087	-42.6807	0.486496	0.324337	0.607005	0.448357	0.302952	0.333005	0.510917	0.437481	0.502535	0.496769	0.401124	0.31478	0.404455	0.650315	NaN	NaN	0.353702	NaN
69.5046	-42.6863	0.486498	0.328596	0.607396	0.414552	0.31025	0.322304	0.488696	0.445628	0.495483	0.501743	0.408102	0.305849	0.41812	0.650729	NaN	NaN	0.328295	NaN
69.4985	-42.6947	0.486501	0.3286	0.626967	0.324526	0.339729	0.290495	0.473605	0.462386	0.46857	0.500989	0.402858	0.303283	0.431463	0.644245	NaN	NaN	0.309591	NaN
69.4944	-42.7004	0.486504	0.3286	0.63349	0.290799	0.346978	0.290493	0.466284	0.47093	0.442054	0.500509	0.388281	0.309581	0.43661	0.633366	NaN	NaN	0.309523	NaN
69.4882	-42.7088	0.486507	0.328601	0.633488	0.290801	0.346979	0.290493	0.480887	0.453789	0.422211	0.484021	0.375993	0.313588	0.449907	0.609982	NaN	NaN	0.317937	NaN
69.4841	-42.7145	0.48651	0.328606	0.63351	0.313389	0.339741	0.290504	0.502866	0.436808	0.415741	0.473315	0.37351	0.315715	0.455351	0.595372	NaN	NaN	0.321329	NaN
69.4779	-42.723	0.486513	0.328609	0.633524	0.369985	0.310279	0.30625	0.532215	0.437326	0.402974	0.473544	0.366542	0.326855	0.450048	0.582901	NaN	NaN	0.309368	NaN
69.4718	-42.7315	0.486516	0.328615	0.633557	0.392699	0.295488	0.322107	0.54714	0.446474	0.410041	0.47413	0.359789	0.34265	0.439524	0.579042	NaN	NaN	0.300917	NaN
69.4677	-42.7372	0.486518	0.315871	0.645523	0.392495	0.299118	0.332818	0.547431	0.455405	0.410309	0.479747	0.355252	0.351647	0.434155	0.578931	NaN	NaN	0.304194	NaN
69.4615	-42.7457	0.486521	0.290511	0.662878	0.38059	0.317418	0.349065	0.526073	0.473007	0.423871	0.48027	0.353182	0.354063	0.43983	0.579133	NaN	NaN	0.316094	NaN
69.4574	-42.7514	0.486524	0.294732	0.650238	0.357793	0.335844	0.349337	0.519072	0.464416	0.443789	0.475209	0.353314	0.347429	0.453548	0.579294	NaN	NaN	0.322938	NaN
69.4512	-42.7599	0.486527	0.32012	0.613274	0.335205	0.350627	0.344196	0.533895	0.421097	0.470084	0.464575	0.353271	0.336168	0.475228	0.577077	NaN	NaN	0.324548	NaN
69.447	-42.7655	0.48653	0.328619	0.600956	0.323929	0.354266	0.333453	0.540953	0.39487	0.489589	0.459138	0.35792	0.327241	0.486143	0.575096	NaN	NaN	0.317807	NaN
69.4408	-42.774	0.486533	0.328632	0.601028	0.29015	0.361387	0.301166	0.539853	0.402859	0.502266	0.458876	0.360139	0.313793	0.499792	0.57328	NaN	NaN	0.307792	NaN
69.4346	-42.7825	0.486536	0.328637	0.60105	0.278909	0.353697	0.290139	0.502331	0.462543	0.488614	0.453024	0.359782	0.306868	0.504931	0.568914	NaN	NaN	0.306065	NaN
69.4305	-42.788	0.486539	0.328647	0.601101	0.278926	0.342421	0.300534	0.473023	0.505468	0.468792	0.447444	0.357222	0.308956	0.504919	0.562755	NaN	NaN	0.307856	NaN
69.4243	-42.7963	0.486541	0.328655	0.601141	0.245205	0.334472	0.326723	0.473082	0.540481	0.429563	0.447311	0.345305	0.319875	0.499432	0.548156	NaN	NaN	0.316406	NaN
69.4201	-42.8019	0.486544	0.328662	0.601177	0.222776	0.334192	0.337203	0.495059	0.558566	0.410287	0.436838	0.338249	0.32649	0.496784	0.537823	NaN	NaN	0.323283	NaN
69.4139	-42.8103	0.486547	0.32866	0.594642	0.233884	0.330431	0.347768	0.524492	0.576875	0.397729	0.426536	0.331303	0.335387	0.4858	0.529286	NaN	NaN	0.329959	NaN
69.4098	-42.816	0.489833	0.324502	0.581642	0.278541	0.334486	0.348178	0.517698	0.586028	0.39141	0.437474	0.326818	0.342199	0.477767	0.529364	NaN	NaN	0.329961	NaN
69.4036	-42.8244	0.499708	0.320507	0.543326	0.379248	0.357853	0.317376	0.481868	0.542091	0.430713	0.448335	0.331731	0.342437	0.480772	0.53376	NaN	NaN	0.321455	NaN
69.3974	-42.8329	0.499711	0.329005	0.511504	0.435095	0.369507	0.280336	0.459548	0.462604	0.502062	0.442598	0.352756	0.329166	0.502669	0.531698	NaN	NaN	0.316214	NaN
69.3933	-42.8386	0.489837	0.333019	0.523926	0.401241	0.365286	0.274601	0.466196	0.418714	0.527593	0.436863	0.366692	0.318074	0.533185	0.515547	NaN	NaN	0.321534	NaN
69.3872	-42.847	0.473443	0.341096	0.542499	0.344954	0.345678	0.294955	0.494534	0.383899	0.526872	0.441731	0.361698	0.31115	0.583009	0.488959	NaN	NaN	NaN	NaN
69.3831	-42.8526	0.470175	0.336738	0.574216	0.322955	0.32701	0.321167	0.501882	0.384045	0.520327	0.436327	0.354485	0.313149	0.604737	0.478367	NaN	NaN	NaN	NaN
69.3769	-42.8611	0.470178	0.32823	0.638459	0.312906	0.312935	0.353627	0.473949	0.410497	0.527823	0.410229	0.36169	0.322224	0.59912	0.478128	NaN	NaN	NaN	NaN
69.3707	-42.8694	0.480003	0.315741	0.683963	0.325227	0.321499	0.371007	0.431767	0.428508	0.548623	0.405662	0.371628	0.340489	0.546593	0.48985	NaN	NaN	NaN	NaN
69.3666	-42.875	0.486573	0.307431	0.690467	0.348063	0.337022	0.361144	0.425089	0.428958	0.555768	0.427502	0.367408	0.354181	0.505575	0.504092	NaN	NaN	NaN	NaN
69.3605	-42.8834	0.480009	0.315749	0.657874	0.358563	0.362966	0.318409	0.475754	0.420583	0.542711	0.432889	0.369871	0.365554	0.461981	0.526887	NaN	NaN	NaN	NaN
69.3564	-42.8889	0.470183	0.328234	0.618878	0.357561	0.36585	0.296398	0.525823	0.411755	0.529174	0.411109	0.378916	0.365481	0.456572	0.53335	NaN	NaN	NaN	NaN
69.3502	-42.8972	0.45386	0.336296	0.591976	0.322584	0.356762	0.289765	0.567642	0.393635	0.508144	0.399443	0.380449	0.353769	0.502901	0.521171	NaN	NaN	NaN	NaN
69.3462	-42.9027	0.444101	0.336035	0.603954	0.266386	0.348316	0.304905	0.552076	0.401548	0.487519	0.40936	0.372913	0.344402	0.560511	0.494512	NaN	NaN	NaN	NaN
69.34	-42.9109	0.437598	0.331619	0.622387	0.23287	0.329157	0.325267	0.493	0.460739	0.460498	0.435261	0.351424	0.337155	0.629458	0.459665	NaN	NaN	NaN	NaN
69.3339	-42.9191	0.444105	0.327568	0.616309	0.300014	0.318839	0.272434	0.499169	0.512012	0.460574	0.440682	0.335027	0.323548	0.651344	0.463853	NaN	NaN	NaN	NaN
69.3298	-42.9246	0.45387	0.32783	0.604379	0.378878	0.316225	0.214783	0.542086	0.520993	0.474143	0.430459	0.325763	0.307886	0.661867	0.476086	NaN	NaN	NaN	NaN
69.3237	-42.9329	0.47347	0.328338	0.62583	0.414623	0.321619	0.168057	0.615729	0.496841	0.47535	0.4046	0.32129	0.287931	0.683117	0.494365	NaN	NaN	NaN	NaN
69.3197	-42.9384	0.483313	0.337094	0.640665	0.393255	0.329881	0.17911	0.63968	0.463648	0.45639	0.394332	0.328523	0.281497	0.69439	0.502805	NaN	NaN	NaN	NaN
69.3136	-42.9466	0.486602	0.349983	0.622498	0.404853	0.337767	0.23275	0.64281	0.395658	0.423967	0.399838	0.347592	0.284152	0.692673	0.513715	NaN	NaN	NaN	NaN
69.3095	-42.9521	0.486604	0.349987	0.589847	0.415248	0.34857	0.275545	0.62949	0.335216	0.403891	0.415465	0.368782	0.291113	0.673766	0.526351	NaN	NaN	NaN	NaN
69.3034	-42.9603	0.476761	0.362527	0.544306	0.39117	0.36612	0.318113	0.585847	0.274309	0.36996	0.462253	0.401634	0.304831	0.62424	0.551232	NaN	NaN	NaN	NaN
69.2973	-42.9686	0.470217	0.370892	0.576821	0.279218	0.369112	0.339164	0.541599	0.256582	0.362634	0.477349	0.432121	0.323013	0.561055	0.571936	NaN	NaN	NaN	NaN
69.2933	-42.974	0.470219	0.370891	0.615977	0.223638	0.361714	0.344413	0.519485	0.256352	0.375461	0.471851	0.446215	0.334355	0.52257	0.575816	NaN	NaN	NaN	NaN
69.2872	-42.9821	0.476769	0.371085	0.583988	0.336102	0.343902	0.317765	0.52634	0.256205	0.414716	0.450899	0.458134	0.348033	0.476074	0.560945	NaN	NaN	NaN	NaN
69.2831	-42.9875	0.483333	0.371282	0.519527	0.470601	0.336939	0.296521	0.540737	0.256219	0.44113	0.429969	0.462949	0.354895	0.457049	NaN	NaN	NaN	NaN	NaN
69.2771	-42.9957	0.486622	0.371387	0.493906	0.560908	0.322538	0.296651	0.53364	0.28212	0.454778	0.41984	0.45851	0.361756	0.446319	NaN	NaN	NaN	NaN	NaN
69.273	-43.0011	0.486625	0.371413	0.519958	0.539301	0.315292	0.307465	0.51949	0.29949	0.455225	0.430932	0.449533	0.364217	0.438466	NaN	NaN	NaN	NaN	NaN
69.267	-43.0092	0.486627	0.371422	0.559057	0.449538	0.315039	0.328788	0.505154	0.299513	0.455275	0.447065	0.442657	0.36201	0.424728	NaN	NaN	NaN	NaN	NaN
69.2609	-43.0174	0.476782	0.383992	0.572081	0.39304	0.31084	0.349804	0.505069	0.299481	0.455187	0.446968	0.435385	0.359529	0.421659	NaN	NaN	NaN	NaN	NaN
69.2569	-43.0228	0.470238	0.383794	0.58453	0.370335	0.310584	0.354944	0.512293	0.290844	0.455095	0.45226	0.425873	0.359374	0.427043	NaN	NaN	NaN	NaN	NaN
69.2509	-43.0309	0.47024	0.370943	0.583548	0.369811	0.302645	0.365036	0.533844	0.264932	0.448098	0.451824	0.418405	0.359035	0.445985	NaN	NaN	NaN	NaN	NaN
69.2468	-43.0363	0.470243	0.370953	0.56404	0.380597	0.294881	0.375274	0.548293	0.239088	0.447804	0.440873	0.418097	0.358866	0.45967	NaN	NaN	NaN	NaN	NaN
69.2408	-43.0444	0.470246	0.366686	0.544273	0.391207	0.287009	0.385366	0.547877	0.221705	0.434098	0.429584	0.422289	0.360897	0.467902	NaN	NaN	NaN	NaN	NaN
69.2368	-43.0497	0.466975	0.362325	0.537202	0.401925	0.28677	0.379717	0.540022	0.23004	0.41402	0.423677	0.424157	0.369642	0.459593	NaN	NaN	NaN	NaN	NaN
69.2307	-43.0577	0.457179	0.366324	0.523661	0.389861	0.289882	0.379157	0.524656	0.229643	0.400234	0.417584	0.423487	0.387236	0.437561	NaN	NaN	NaN	NaN	NaN
69.2247	-43.0658	0.447405	0.370322	0.503736	0.388914	0.30047	0.373552	0.480304	0.254755	0.393086	0.422292	0.42787	0.396162	0.404734	NaN	NaN	NaN	NaN	NaN
69.2207	-43.0711	0.440904	0.370122	0.50314	0.377259	0.311266	0.357457	0.457868	0.271386	0.399146	0.421907	0.437033	0.393867	0.385421	NaN	NaN	NaN	NaN	NaN
69.2147	-43.0792	0.431033	0.365577	0.502025	0.376528	0.325675	0.336112	0.420966	0.296319	0.42472	0.411166	0.451055	0.376054	0.38258	NaN	NaN	NaN	NaN	NaN
69.2107	-43.0846	0.421104	0.369583	0.488643	0.386982	0.336489	0.325484	0.399022	0.321586	0.418037	0.410987	0.453339	0.364852	0.396202	NaN	NaN	NaN	NaN	NaN
69.2047	-43.0926	0.407921	0.38629	0.469416	0.364042	0.343204	0.330457	0.39153	0.338435	0.365655	0.43661	0.445902	0.366791	0.41248	NaN	NaN	NaN	NaN	NaN
69.2007	-43.0979	0.404639	0.390472	0.456605	0.374835	0.33932	0.340868	0.40602	0.330084	0.32671	0.45729	0.441078	0.371143	0.420693	NaN	NaN	NaN	NaN	NaN
69.1948	-43.106	0.41781	0.395151	0.425885	0.430695	0.336352	0.336051	0.435455	0.305043	0.327051	0.452382	0.424662	0.388861	0.426259	NaN	NaN	NaN	NaN	NaN
69.1888	-43.114	0.440911	0.404452	0.42162	0.488782	0.315792	0.331589	0.443594	0.29709	0.366748	0.437681	0.392157	0.417771	0.418206	NaN	NaN	NaN	NaN	NaN
69.1848	-43.1193	0.457195	0.400669	0.454809	0.468432	0.301731	0.342678	0.444327	0.280361	0.380136	0.45415	0.364371	0.440053	0.404647	NaN	NaN	NaN	NaN	NaN
69.1788	-43.1272	0.470277	0.388163	0.506911	0.391107	0.294471	0.369498	0.437722	0.254912	0.386745	0.50774	0.346243	0.444702	0.380085	NaN	NaN	NaN	NaN	NaN
69.1749	-43.1325	0.463735	0.383665	0.519022	0.368295	0.29407	0.385169	0.423077	0.25474	0.393031	0.52896	0.362914	0.41809	0.382647	NaN	NaN	NaN	NaN	NaN
69.1689	-43.1405	0.437657	0.391469	0.510831	0.36704	0.293168	0.373426	0.436429	0.271346	0.392534	0.523076	0.39334	0.375774	0.415187	NaN	NaN	NaN	NaN	NaN
69.1649	-43.1457	0.417832	0.403756	0.503574	0.377581	0.292806	0.351684	0.450021	0.296678	0.372814	0.501265	0.409417	0.360119	0.439821	NaN	NaN	NaN	NaN	NaN
69.1589	-43.1537	0.404678	0.416237	0.503315	0.422395	0.285749	0.335833	0.427956	0.339112	0.327203	0.473823	0.425122	0.35096	0.464331	NaN	NaN	NaN	NaN	NaN
69.1529	-43.1616	0.42443	0.412567	0.550007	0.402355	0.268286	0.347128	0.385339	0.364939	0.307979	0.457818	0.415318	0.359488	0.469439	NaN	NaN	NaN	NaN	NaN
69.1489	-43.1669	0.45068	0.400477	0.577627	0.358669	0.2651	0.363714	0.357167	0.373822	0.31478	0.447615	0.394144	0.372492	0.469155	NaN	NaN	NaN	NaN	NaN
69.1429	-43.1749	0.480125	0.379879	0.559262	0.347477	0.280096	0.369605	0.364964	0.365837	0.334744	0.448373	0.371041	0.381222	0.460749	NaN	NaN	NaN	NaN	NaN
69.1388	-43.1802	0.486699	0.367195	0.539358	0.358076	0.290968	0.369558	0.386706	0.34886	0.334779	0.459001	0.385301	0.368128	0.446913	NaN	NaN	NaN	NaN	NaN
69.1328	-43.1882	0.473568	0.362555	0.524934	0.345559	0.312443	0.358578	0.40805	0.322969	0.327935	0.474504	0.415987	0.357553	0.433611	NaN	NaN	NaN	NaN	NaN
69.1268	-43.1962	0.447437	0.361836	0.542065	0.299859	0.322459	0.341787	0.406941	0.339377	0.320901	0.473844	0.415597	0.359633	0.477784	NaN	NaN	NaN	NaN	NaN
69.1227	-43.2015	0.431074	0.365627	0.553758	0.27717	0.321875	0.335929	0.391745	0.355787	0.313939	0.467817	0.41267	0.339093	0.529451	NaN	NaN	NaN	NaN	NaN
69.1167	-43.2095	0.411286	0.382135	0.566064	0.232506	0.317561	0.335279	0.383867	0.346543	0.31332	0.456402	0.414322	0.320905	0.534128	NaN	NaN	NaN	NaN	NaN
69.1127	-43.2148	0.404722	0.394782	0.559966	0.221373	0.313707	0.335048	0.398087	0.32947	0.306694	0.456144	0.414157	0.3186	0.503696	NaN	NaN	NaN	NaN	NaN
69.1067	-43.2228	0.417874	0.395209	0.5354	0.266024	0.295667	0.345604	0.420006	0.321376	0.287578	0.456254	0.411898	0.303052	0.481434	NaN	NaN	NaN	NaN	NaN
69.1026	-43.2281	0.434396	0.387159	0.523419	0.311002	0.277725	0.356327	0.43491	0.321853	0.275016	0.461941	0.407556	0.294297	0.467791	NaN	NaN	NaN	NaN	NaN
69.0966	-43.2361	0.467028	0.36674	0.518414	0.345404	0.263679	0.3621	0.442794	0.330945	0.262522	0.478362	0.403379	0.287835	0.448623	NaN	NaN	NaN	NaN	NaN
69.0906	-43.2441	0.496595	0.337652	0.538474	0.368876	0.260763	0.35759	0.399891	0.356633	0.288618	0.489694	0.399234	0.303628	0.440921	NaN	NaN	NaN	NaN	NaN
69.0865	-43.2494	0.499896	0.333479	0.564521	0.358299	0.272354	0.336994	0.356651	0.382015	0.314554	0.495406	0.394811	0.326027	0.446978	NaN	NaN	NaN	NaN	NaN
69.0805	-43.2573	0.470301	0.362574	0.60306	0.325006	0.298788	0.300511	0.298985	0.381164	0.372577	0.495688	0.399724	0.341901	0.477868	NaN	NaN	NaN	NaN	NaN
69.0764	-43.2626	0.437678	0.383002	0.620979	0.313391	0.317224	0.290044	0.270195	0.346383	0.41744	0.484921	0.409002	0.339733	0.486217	NaN	NaN	NaN	NaN	NaN
69.0704	-43.2705	0.408041	0.382087	0.611311	0.334378	0.323604	0.321484	0.248646	0.286301	0.455416	0.46847	0.403714	0.341552	0.447198	NaN	NaN	NaN	NaN	NaN
69.0663	-43.2758	0.414611	0.360959	0.597338	0.333502	0.315395	0.358083	0.248658	0.260793	0.455042	0.473474	0.389404	0.341189	0.424911	NaN	NaN	NaN	NaN	NaN
69.0603	-43.2837	0.444212	0.319281	0.622779	0.266629	0.296231	0.399686	0.255779	0.26081	0.415784	0.509802	0.37518	0.334076	0.432375	NaN	NaN	NaN	NaN	NaN
69.0542	-43.2917	0.480161	0.282151	0.675504	0.245456	0.256227	0.415254	0.27732	0.295106	0.358005	0.552075	0.368479	0.331916	0.459725	NaN	NaN	NaN	NaN	NaN
69.0502	-43.2971	0.496619	0.274092	0.689799	0.279878	0.234767	0.404881	0.298937	0.321049	0.319709	0.573553	0.364094	0.343211	0.462916	NaN	NaN	NaN	NaN	NaN
69.0442	-43.305	0.483446	0.30759	0.645553	0.358646	0.242647	0.373628	0.327796	0.355769	0.300957	0.579628	0.362152	0.359103	0.455211	NaN	NaN	NaN	NaN	NaN
69.0401	-43.3103	0.45398	0.357841	0.594522	0.36909	0.27215	0.352803	0.342302	0.356067	0.33369	0.559372	0.360089	0.366038	0.450151	NaN	NaN	NaN	NaN	NaN
69.0341	-43.3182	0.427821	0.404107	0.543392	0.323022	0.319663	0.331823	0.356662	0.338978	0.405339	0.5069	0.357604	0.372497	0.441562	NaN	NaN	NaN	NaN	NaN
69.0301	-43.3235	0.434428	0.391422	0.543046	0.289159	0.341568	0.321333	0.356605	0.33034	0.457556	0.459534	0.362084	0.372361	0.441322	NaN	NaN	NaN	NaN	NaN
69.024	-43.3314	0.467064	0.336852	0.587466	0.244843	0.337792	0.326531	0.356561	0.29605	0.535863	0.396449	0.366438	0.374387	0.452047	NaN	NaN	NaN	NaN	NaN
69.018	-43.3393	0.476904	0.307388	0.651116	0.223086	0.312104	0.32612	0.377842	0.261871	0.548304	0.390886	0.359097	0.378442	0.468127	NaN	NaN	NaN	NaN	NaN
69.014	-43.3446	0.453992	0.319524	0.695245	0.245903	0.294041	0.31009	0.399114	0.253336	0.508578	0.421968	0.351932	0.375926	0.478723	NaN	NaN	NaN	NaN	NaN
69.0079	-43.3525	0.427836	0.339998	0.720175	0.313771	0.257454	0.309733	0.405924	0.270224	0.423451	0.484231	0.347165	0.364603	0.483784	NaN	NaN	NaN	NaN	NaN
69.0039	-43.3577	0.440978	0.323414	0.700601	0.369897	0.242729	0.314827	0.39857	0.287115	0.377877	0.509974	0.351743	0.35794	0.475456	NaN	NaN	NaN	NaN	NaN
68.9979	-43.3655	0.476915	0.286281	0.655849	0.42562	0.231539	0.314487	0.398228	0.303941	0.371344	0.499223	0.360939	0.3625	0.437446	NaN	NaN	NaN	NaN	NaN
68.9939	-43.3708	0.48349	0.286435	0.624104	0.425002	0.227516	0.298057	0.426162	0.312207	0.416731	0.452121	0.365397	0.378076	0.405013	NaN	NaN	NaN	NaN	NaN
68.988	-43.3786	0.463815	0.315566	0.58559	0.4014	0.23425	0.281639	0.446633	0.328818	0.462196	0.38916	0.371958	0.395827	0.380801	NaN	NaN	NaN	NaN	NaN
68.982	-43.3863	0.434449	0.352999	0.546843	0.400237	0.244765	0.313088	0.396719	0.32844	0.396519	0.43011	0.37866	0.386848	0.394308	NaN	NaN	NaN	NaN	NaN
68.9781	-43.3915	0.427853	0.361341	0.533985	0.388606	0.255588	0.329045	0.368402	0.311338	0.344359	0.471219	0.385563	0.371301	0.413247	NaN	NaN	NaN	NaN	NaN
68.9722	-43.3992	0.444249	0.340541	0.540486	0.332721	0.277428	0.345317	0.361907	0.260735	0.331289	0.481428	0.390206	0.360244	0.426861	NaN	NaN	NaN	NaN	NaN
68.9682	-43.4044	0.467092	0.31993	0.554056	0.310974	0.2777	0.35094	0.376744	0.227173	0.3573	0.460914	0.387963	0.360274	0.426909	NaN	NaN	NaN	NaN	NaN
68.9623	-43.4121	0.493375	0.307866	0.588171	0.33508	0.249353	0.346194	0.406137	0.210695	0.409936	0.425432	0.379084	0.362685	0.429904	NaN	NaN	NaN	NaN	NaN
68.9584	-43.4172	0.490082	0.320535	0.601967	0.36978	0.231464	0.351869	0.406669	0.227948	0.436836	0.410628	0.374953	0.365282	0.435872	NaN	NaN	NaN	NaN	NaN
68.9525	-43.4249	0.463832	0.358182	0.595806	0.381151	0.227839	0.367947	0.378096	0.270557	0.470226	0.422212	0.368728	0.374714	0.436493	NaN	NaN	NaN	NaN	NaN
68.9465	-43.4326	0.434465	0.382985	0.581838	0.357625	0.242041	0.372915	0.341724	0.304151	0.476508	0.46475	0.366883	0.388586	0.428907	NaN	NaN	NaN	NaN	NaN
68.9426	-43.4378	0.417994	0.386775	0.580538	0.334359	0.248835	0.372333	0.33405	0.303663	0.462706	0.496006	0.371558	0.393167	0.429069	NaN	NaN	NaN	NaN	NaN
68.9366	-43.4454	0.404888	0.390637	0.560048	0.333348	0.251843	0.366209	0.333284	0.294504	0.442013	0.515916	0.387555	0.384072	0.439719	NaN	NaN	NaN	NaN	NaN
68.9327	-43.4506	0.404893	0.390645	0.534222	0.355103	0.251622	0.365937	0.325882	0.294232	0.441662	0.49958	0.398958	0.377326	0.447876	NaN	NaN	NaN	NaN	NaN
68.9267	-43.4583	0.404898	0.390654	0.508458	0.376809	0.24398	0.381344	0.318609	0.294058	0.467575	0.436083	0.393481	0.394711	0.447778	NaN	NaN	NaN	NaN	NaN
68.9227	-43.4634	0.404902	0.390653	0.502021	0.36539	0.243759	0.391679	0.325783	0.285654	0.4741	0.399119	0.381206	0.414279	0.442131	NaN	NaN	NaN	NaN	NaN
68.9167	-43.4712	0.404907	0.39066	0.502038	0.331832	0.254522	0.386367	0.354441	0.260454	0.434916	0.403817	0.376143	0.427383	0.431125	NaN	NaN	NaN	NaN	NaN
68.9106	-43.479	0.411459	0.38231	0.502063	0.37662	0.240192	0.370425	0.382888	0.226619	0.389039	0.450324	0.378461	0.425199	0.431164	NaN	NaN	NaN	NaN	NaN
68.9066	-43.4842	0.418027	0.373951	0.502059	0.432784	0.229626	0.354768	0.389942	0.20969	0.382302	0.465804	0.378437	0.420654	0.436517	NaN	NaN	NaN	NaN	NaN
68.9005	-43.4921	0.421319	0.374042	0.502346	0.523306	0.212012	0.334069	0.389928	0.209688	0.388767	0.476489	0.378644	0.405057	0.447275	NaN	NaN	NaN	NaN	NaN
68.8965	-43.4973	0.421323	0.382602	0.502941	0.55792	0.201345	0.339661	0.368746	0.22662	0.395512	0.487505	0.379049	0.389653	0.447208	NaN	NaN	NaN	NaN	NaN
68.8903	-43.5053	0.421326	0.408357	0.485317	0.536071	0.216317	0.351034	0.319243	0.252079	0.434977	0.488703	0.384496	0.365632	0.439026	NaN	NaN	NaN	NaN	NaN
68.8842	-43.5132	0.42133	0.429915	0.473747	0.446119	0.249333	0.35159	0.290913	0.252073	0.500364	0.50058	0.378291	0.352614	0.436345	NaN	NaN	NaN	NaN	NaN
68.8802	-43.5184	0.421333	0.429913	0.480215	0.378575	0.274868	0.346517	0.291004	0.243667	0.533176	0.501168	0.371536	0.354921	0.433667	NaN	NaN	NaN	NaN	NaN
68.8741	-43.5263	0.421337	0.404059	0.5174	0.333603	0.293048	0.341342	0.312617	0.218475	0.546455	0.474804	0.383209	0.361828	0.423029	NaN	NaN	NaN	NaN	NaN
68.8701	-43.5315	0.42134	0.378314	0.541415	0.366959	0.285689	0.346511	0.319779	0.218518	0.539866	0.453348	0.399354	0.361855	0.414712	NaN	NaN	NaN	NaN	NaN
68.864	-43.5393	0.421344	0.352704	0.539439	0.467036	0.259913	0.367252	0.341324	0.218703	0.520369	0.458468	0.406353	0.361868	0.403618	NaN	NaN	NaN	NaN	NaN
68.86	-43.5445	0.421347	0.348441	0.519769	0.51112	0.248728	0.382781	0.348483	0.227236	0.507382	0.479613	0.399439	0.361786	0.400718	NaN	NaN	NaN	NaN	NaN
68.854	-43.5522	0.421351	0.348451	0.506967	0.488073	0.244575	0.408769	0.3269	0.278032	0.475129	0.506149	0.390286	0.35958	0.398027	NaN	NaN	NaN	NaN	NaN
68.848	-43.5599	0.421354	0.348446	0.545525	0.377017	0.240406	0.434632	0.290909	0.328668	0.42941	0.537306	0.378403	0.354778	0.394889	NaN	NaN	NaN	NaN	NaN
68.8439	-43.5651	0.421358	0.34844	0.57777	0.321817	0.229294	0.4394	0.276347	0.362316	0.43586	0.526634	0.366466	0.352161	0.394474	NaN	NaN	NaN	NaN	NaN
68.8379	-43.5728	0.421361	0.348439	0.577761	0.377936	0.200234	0.428175	0.275846	0.37022	0.513814	0.453005	0.36131	0.338345	0.402002	NaN	NaN	NaN	NaN	NaN
68.8339	-43.5779	0.421365	0.348443	0.551955	0.46721	0.189519	0.407037	0.282711	0.33591	0.532569	0.426173	0.372512	0.327085	0.409842	NaN	NaN	NaN	NaN	NaN
68.8279	-43.5856	0.421368	0.352705	0.526555	0.568226	0.186353	0.359984	0.318077	0.2597	0.485628	0.461645	0.386077	0.318153	0.415122	NaN	NaN	NaN	NaN	NaN
68.8239	-43.5908	0.427941	0.352905	0.527203	0.580238	0.194023	0.32887	0.339493	0.234522	0.472546	0.498478	0.377043	0.315991	0.417924	NaN	NaN	NaN	NaN	NaN
68.8179	-43.5985	0.437817	0.353186	0.54751	0.502458	0.227404	0.308647	0.340004	0.251762	0.512625	0.510705	0.345124	0.315997	0.426119	NaN	NaN	NaN	NaN	NaN
68.8119	-43.6063	0.437819	0.366005	0.54205	0.423751	0.260445	0.325165	0.319332	0.294656	0.566868	0.470263	0.33405	0.309616	0.423662	NaN	NaN	NaN	NaN	NaN
68.8079	-43.6114	0.437821	0.370279	0.522927	0.389465	0.278513	0.341166	0.312456	0.311894	0.574086	0.449426	0.348212	0.301006	0.415531	NaN	NaN	NaN	NaN	NaN
68.8019	-43.6191	0.434537	0.374462	0.490648	0.343603	0.292252	0.361826	0.33394	0.30356	0.567615	0.438746	0.381102	0.290387	0.396712	NaN	NaN	NaN	NaN	NaN
68.7979	-43.6242	0.427956	0.374261	0.49008	0.320874	0.287984	0.361078	0.369348	0.286498	0.560617	0.427738	0.401981	0.290521	0.38864	NaN	NaN	NaN	NaN	NaN
68.7919	-43.6319	0.41811	0.36542	0.514361	0.287222	0.280017	0.349559	0.425897	0.243951	0.533398	0.42674	0.420142	0.301563	0.388716	NaN	NaN	NaN	NaN	NaN
68.7879	-43.6371	0.411563	0.356706	0.538904	0.276091	0.272478	0.349148	0.432666	0.226847	0.51312	0.436609	0.431591	0.303806	0.394234	NaN	NaN	NaN	NaN	NaN
68.7819	-43.6448	0.405034	0.348031	0.556971	0.287115	0.2577	0.359222	0.425223	0.218184	0.493018	0.441243	0.452539	0.297333	0.408045	NaN	NaN	NaN	NaN	NaN
68.7759	-43.6524	0.405039	0.348041	0.53772	0.353587	0.243291	0.348509	0.424823	0.23492	0.466834	0.456661	0.452467	0.299537	0.413601	NaN	NaN	NaN	NaN	NaN
68.7719	-43.6576	0.405044	0.348056	0.531357	0.398186	0.232562	0.327391	0.438705	0.251732	0.453916	0.477794	0.436189	0.30387	0.413669	NaN	NaN	NaN	NaN	NaN
68.7658	-43.6653	0.414853	0.335602	0.512124	0.464857	0.221809	0.311566	0.459884	0.251751	0.447451	0.483048	0.417298	0.303559	0.413394	NaN	NaN	NaN	NaN	NaN
68.7618	-43.6704	0.424693	0.323145	0.499292	0.520542	0.211028	0.316827	0.452791	0.251735	0.447387	0.472343	0.414696	0.298929	0.410317	NaN	NaN	NaN	NaN	NaN
68.7557	-43.6782	0.434558	0.310711	0.512107	0.554947	0.193036	0.332686	0.453284	0.235034	0.460565	0.451479	0.419332	0.290077	0.401974	NaN	NaN	NaN	NaN	NaN
68.7517	-43.6833	0.437845	0.306565	0.524931	0.555506	0.189518	0.332819	0.460646	0.235177	0.473872	0.4307	0.42875	0.283553	0.399223	NaN	NaN	NaN	NaN	NaN
68.7456	-43.6911	0.437847	0.306564	0.544199	0.533735	0.197001	0.317346	0.467846	0.252225	0.487355	0.404747	0.438186	0.281473	0.404753	NaN	NaN	NaN	NaN	NaN
68.7395	-43.6988	0.43785	0.306564	0.576395	0.467228	0.208014	0.322895	0.468342	0.25247	0.500874	0.378801	0.431049	0.287997	0.415619	NaN	NaN	NaN	NaN	NaN
68.7354	-43.704	0.437852	0.315017	0.589989	0.400473	0.222639	0.333765	0.447298	0.261052	0.501152	0.378978	0.424101	0.281282	0.420861	NaN	NaN	NaN	NaN	NaN
68.7293	-43.7117	0.427994	0.340199	0.597471	0.311219	0.255602	0.334424	0.411889	0.286572	0.488384	0.389591	0.431368	0.243816	0.44205	NaN	NaN	NaN	NaN	NaN
68.7253	-43.7168	0.41816	0.352677	0.597449	0.288786	0.270232	0.334677	0.397708	0.312137	0.455978	0.405216	0.433759	0.226195	0.458029	NaN	NaN	NaN	NaN	NaN
68.7192	-43.7245	0.408354	0.36518	0.578051	0.277168	0.27717	0.345059	0.39773	0.337791	0.391052	0.45748	0.405653	0.23915	0.45792	NaN	NaN	NaN	NaN	NaN
68.7151	-43.7297	0.405098	0.369369	0.552302	0.287796	0.276815	0.334071	0.426018	0.346334	0.358619	0.488978	0.382297	0.258786	0.439121	NaN	NaN	NaN	NaN	NaN
68.7091	-43.7373	0.405103	0.369395	0.520177	0.309391	0.265341	0.306875	0.482216	0.371807	0.319767	0.520455	0.361271	0.278465	0.398552	NaN	NaN	NaN	NaN	NaN
68.7031	-43.745	0.405108	0.36941	0.50094	0.331234	0.243049	0.327136	0.474545	0.405702	0.2939	0.541428	0.356651	0.291756	0.35267	NaN	NaN	NaN	NaN	NaN
68.6991	-43.7501	0.408373	0.365249	0.500959	0.331246	0.235678	0.348016	0.446034	0.422638	0.287445	0.546682	0.359034	0.305154	0.320482	NaN	NaN	NaN	NaN	NaN
68.6931	-43.7577	0.418183	0.352744	0.500947	0.3424	0.235788	0.364044	0.424991	0.414151	0.313335	0.525801	0.375497	0.307665	0.301802	NaN	NaN	NaN	NaN	NaN
68.6891	-43.7628	0.428017	0.348764	0.495106	0.353762	0.236014	0.364342	0.425291	0.397231	0.345799	0.51042	0.387438	0.290156	0.323358	NaN	NaN	NaN	NaN	NaN
68.6831	-43.7704	0.437873	0.357574	0.483693	0.376753	0.236583	0.349188	0.461798	0.338091	0.404512	0.479619	0.404283	0.25506	0.388345	NaN	NaN	NaN	NaN	NaN
68.6791	-43.7754	0.437876	0.366122	0.484265	0.399627	0.237033	0.333834	0.491017	0.295815	0.43727	0.458892	0.411492	0.241915	0.418309	NaN	NaN	NaN	NaN	NaN
68.673	-43.783	0.424742	0.387154	0.497469	0.422805	0.230166	0.334261	0.498871	0.236407	0.456602	0.474945	0.392803	0.257273	0.418472	NaN	NaN	NaN	NaN	NaN
68.667	-43.7906	0.405136	0.3994	0.522418	0.445593	0.219333	0.339565	0.477182	0.236252	0.449729	0.495877	0.373906	0.279163	0.399388	NaN	NaN	NaN	NaN	NaN
68.663	-43.7957	0.39538	0.394795	0.540555	0.445359	0.222946	0.339557	0.455382	0.261565	0.462808	0.474725	0.392644	0.266068	0.391149	NaN	NaN	NaN	NaN	NaN
68.657	-43.8033	0.388897	0.377482	0.545128	0.444245	0.229856	0.328545	0.461873	0.269766	0.482151	0.442836	0.432561	0.242104	0.385789	NaN	NaN	NaN	NaN	NaN
68.6529	-43.8084	0.388903	0.364707	0.544257	0.409878	0.240351	0.322914	0.46859	0.269561	0.468796	0.442472	0.44186	0.244372	0.386046	NaN	NaN	NaN	NaN	NaN
68.6469	-43.8161	0.395397	0.343642	0.556191	0.342523	0.254352	0.333139	0.439545	0.277647	0.422533	0.44662	0.448214	0.259697	0.386157	NaN	NaN	NaN	NaN	NaN
68.6408	-43.8238	0.405167	0.335423	0.550094	0.297886	0.253871	0.348472	0.410524	0.277186	0.408879	0.440493	0.452241	0.277242	0.380774	NaN	NaN	NaN	NaN	NaN
68.6368	-43.8289	0.405171	0.343917	0.537878	0.29789	0.246491	0.348178	0.403025	0.27691	0.428032	0.424612	0.451958	0.290467	0.375431	NaN	NaN	NaN	NaN	NaN
68.6307	-43.8365	0.405176	0.348175	0.531781	0.342544	0.232192	0.337613	0.395555	0.268166	0.460136	0.414181	0.442416	0.310334	0.372909	NaN	NaN	NaN	NaN	NaN
68.6267	-43.8416	0.405181	0.348181	0.531801	0.364924	0.225038	0.337629	0.388394	0.259617	0.472945	0.419499	0.435431	0.316963	0.372988	NaN	NaN	NaN	NaN	NaN
68.6206	-43.8492	0.405186	0.348173	0.55107	0.376699	0.210686	0.32702	0.402418	0.251132	0.479219	0.440572	0.42619	0.316882	0.372848	NaN	NaN	NaN	NaN	NaN
68.6166	-43.8543	0.405191	0.348174	0.563971	0.377089	0.203506	0.316461	0.409294	0.259509	0.479211	0.461773	0.419418	0.31469	0.372832	NaN	NaN	NaN	NaN	NaN
68.6105	-43.8619	0.405196	0.348165	0.53815	0.432421	0.199905	0.305883	0.401744	0.284594	0.498691	0.48327	0.40332	0.314606	0.372682	NaN	NaN	NaN	NaN	NaN
68.6044	-43.8695	0.398691	0.356489	0.499614	0.498438	0.192529	0.300355	0.415609	0.292949	0.531378	0.489172	0.377759	0.321031	0.375265	NaN	NaN	NaN	NaN	NaN
68.6004	-43.8746	0.388955	0.364731	0.486533	0.508897	0.192355	0.305372	0.422642	0.276026	0.557333	0.478797	0.368346	0.325319	0.375209	NaN	NaN	NaN	NaN	NaN
68.5944	-43.8822	0.371777	0.372802	0.492063	0.497136	0.19208	0.315504	0.415317	0.2674	0.556815	0.467803	0.375055	0.320769	0.380495	NaN	NaN	NaN	NaN	NaN
68.5903	-43.8873	0.361232	0.381079	0.498183	0.485942	0.188326	0.315256	0.41505	0.284136	0.511033	0.467029	0.391086	0.316364	0.383219	NaN	NaN	NaN	NaN	NaN
68.5842	-43.8949	0.35424	0.389453	0.504609	0.441395	0.188062	0.320136	0.414783	0.300884	0.419933	0.460085	0.420608	0.318557	0.377824	NaN	NaN	NaN	NaN	NaN
68.5802	-43.9	0.361244	0.381094	0.517425	0.408296	0.184309	0.330377	0.400483	0.317615	0.374633	0.448677	0.436366	0.318478	0.380489	NaN	NaN	NaN	NaN	NaN
68.5741	-43.9076	0.378876	0.360223	0.530256	0.386349	0.180651	0.335493	0.379048	0.342693	0.355271	0.437779	0.438262	0.322742	0.385851	NaN	NaN	NaN	NaN	NaN
68.568	-43.9152	0.398729	0.335279	0.530263	0.386355	0.191648	0.335933	0.336683	0.342331	0.419569	0.443887	0.415387	0.329328	0.383162	NaN	NaN	NaN	NaN	NaN
68.5639	-43.9204	0.408493	0.322829	0.530232	0.386334	0.206333	0.325947	0.315549	0.333708	0.484175	0.471183	0.38576	0.333709	0.377668	NaN	NaN	NaN	NaN	NaN
68.5577	-43.9281	0.418281	0.310403	0.530228	0.419895	0.214001	0.30029	0.315543	0.308346	0.562056	0.525536	0.342434	0.338145	0.374989	NaN	NaN	NaN	NaN	NaN
68.5536	-43.9332	0.421554	0.306266	0.530253	0.453565	0.210627	0.290032	0.315564	0.291501	0.587991	0.541912	0.33105	0.338183	0.380492	NaN	NaN	NaN	NaN	NaN
68.5475	-43.9408	0.418289	0.323103	0.51199	0.487326	0.203557	0.26914	0.336576	0.291534	0.561876	0.562876	0.331106	0.344948	0.377998	NaN	NaN	NaN	NaN	NaN
68.5434	-43.9459	0.411768	0.339896	0.499761	0.498583	0.192585	0.258422	0.357392	0.299861	0.522607	0.551242	0.351715	0.342746	0.377962	NaN	NaN	NaN	NaN	NaN
68.5372	-43.9536	0.405265	0.348216	0.493378	0.509626	0.170514	0.273481	0.357008	0.324879	0.451085	0.517843	0.397581	0.322876	0.385978	NaN	NaN	NaN	NaN	NaN
68.5311	-43.9613	0.40527	0.348221	0.474187	0.542623	0.148503	0.304198	0.349919	0.333226	0.39288	0.532542	0.411268	0.307316	0.393902	NaN	NaN	NaN	NaN	NaN
69.6411	-44.8355	0.568455	0.534356	0.44205	0.433795	0.442714	0.435786	0.578652	0.458467	0.638601	0.404535	NaN	NaN	NaN	NaN	NaN	NaN	NaN	NaN
69.6432	-44.8203	0.575143	0.539022	0.422811	0.468515	0.431575	0.435781	0.548364	0.48489	0.645342	0.404528	NaN	NaN	NaN	NaN	NaN	NaN	NaN	NaN
69.6453	-44.8051	0.585202	0.539346	0.403528	0.561342	0.401778	0.435705	0.51048	0.493128	0.67209	0.393452	NaN	NaN	NaN	NaN	NaN	NaN	NaN	NaN
69.6468	-44.7936	0.585203	0.548207	0.390677	0.643038	0.371806	0.441133	0.487909	0.501744	0.685656	0.377047	NaN	NaN	NaN	NaN	NaN	NaN	NaN	NaN
69.6488	-44.7783	0.581848	0.55255	0.390706	0.690011	0.333665	0.456995	0.47258	0.49231	0.712666	0.366067	NaN	NaN	NaN	NaN	NaN	NaN	NaN	NaN
69.6508	-44.7629	0.565115	0.56078	0.409974	0.619715	0.325172	0.477928	0.464491	0.464847	0.745815	0.371289	NaN	NaN	NaN	NaN	NaN	NaN	NaN	NaN
69.6523	-44.7514	0.555106	0.560374	0.42919	0.526436	0.331814	0.48243	0.471218	0.446468	0.765216	0.370998	NaN	NaN	NaN	NaN	NaN	NaN	NaN	NaN
69.6545	-44.7361	0.535153	0.559634	0.454364	0.456483	0.33077	0.492226	0.485418	0.428287	0.771233	0.359779	NaN	NaN	NaN	NaN	NaN	NaN	NaN	NaN
69.6566	-44.7206	0.515296	0.563326	0.440036	0.455078	0.329879	0.491151	0.499517	0.427836	0.750031	0.364791	NaN	NaN	NaN	NaN	NaN	NaN	NaN	NaN
69.6582	-44.7089	0.505402	0.558552	0.426001	0.430856	0.347935	0.47421	0.521223	0.427602	0.722314	0.380752	NaN	NaN	NaN	NaN	NaN	NaN	NaN	NaN
69.6602	-44.6932	0.502112	0.545183	0.418569	0.304233	0.402833	0.446579	0.542791	0.418448	0.708011	0.396713	NaN	NaN	NaN	NaN	NaN	NaN	NaN	NaN
69.6622	-44.6775	0.508699	0.53661	0.431694	0.236361	0.417434	0.430093	0.549753	0.435908	0.701062	0.402063	NaN	NaN	NaN	NaN	NaN	NaN	NaN	NaN
69.6638	-44.6657	0.518606	0.523744	0.464576	0.31661	0.373498	0.435523	0.542329	0.435833	0.700852	0.401985	NaN	NaN	NaN	NaN	NaN	NaN	NaN	NaN
69.6659	-44.65	0.531845	0.506631	0.50416	0.409374	0.321966	0.462939	0.513114	0.453614	0.708032	0.391317	NaN	NaN	NaN	NaN	NaN	NaN	NaN	NaN
69.668	-44.6343	0.548453	0.494016	0.504629	0.432751	0.322446	0.468971	0.50623	0.471691	0.701742	0.38065	NaN	NaN	NaN	NaN	NaN	NaN	NaN	NaN
69.6696	-44.6224	0.551786	0.502909	0.465705	0.386145	0.352101	0.480152	0.499194	0.516452	0.675376	0.380866	NaN	NaN	NaN	NaN	NaN	NaN	NaN	NaN
69.6716	-44.6065	0.551787	0.511721	0.420035	0.293818	0.415254	0.464349	0.529433	0.544084	0.642488	0.375719	NaN	NaN	NaN	NaN	NaN	NaN	NaN	NaN
69.6737	-44.5906	0.538484	0.542118	0.387772	0.327769	0.419303	0.453701	0.559597	0.517913	0.649692	0.365023	NaN	NaN	NaN	NaN	NaN	NaN	NaN	NaN
69.6753	-44.5788	0.535169	0.546393	0.394334	0.419514	0.397727	0.437577	0.582096	0.491413	0.670183	0.34882	0.498823	0.358115	NaN	NaN	NaN	NaN	NaN	NaN
69.6775	-44.5629	0.535169	0.559602	0.408079	0.478052	0.364595	0.432077	0.61193	0.455991	0.669702	0.365013	0.491389	0.357891	NaN	NaN	NaN	NaN	NaN	NaN
69.6796	-44.547	0.53517	0.568433	0.428281	0.444439	0.357163	0.432005	0.626838	0.473933	0.642579	0.386738	0.481755	0.366896	NaN	NaN	NaN	NaN	NaN	NaN
69.6811	-44.535	0.535171	0.568432	0.448134	0.445036	0.346064	0.432002	0.626831	0.509648	0.62941	0.39234	0.474654	0.376025	NaN	NaN	NaN	NaN	NaN	NaN
69.6832	-44.519	0.535172	0.56843	0.45476	0.491536	0.327534	0.41	0.656265	0.527532	0.636519	0.392541	0.467546	0.387442	NaN	NaN	NaN	NaN	NaN	NaN
69.6852	-44.503	0.535173	0.555138	0.460688	0.537486	0.316267	0.409855	0.648493	0.50043	0.642654	0.425048	0.46279	0.394284	NaN	NaN	NaN	NaN	NaN	NaN
69.6869	-44.4907	0.535174	0.546331	0.453645	0.548412	0.312213	0.425979	0.618528	0.482212	0.655764	0.446769	0.462947	0.401302	NaN	NaN	NaN	NaN	NaN	NaN
69.6891	-44.4747	0.528542	0.537266	0.452731	0.501135	0.338021	0.431346	0.588474	0.463951	0.65496	0.468241	0.467724	0.403634	NaN	NaN	NaN	NaN	NaN	NaN
69.6912	-44.4587	0.51862	0.532495	0.445233	0.419457	0.382309	0.431374	0.558489	0.472421	0.675181	0.429928	0.484357	0.403694	NaN	NaN	NaN	NaN	NaN	NaN
69.6928	-44.4466	0.518621	0.519311	0.44456	0.350261	0.415401	0.431418	0.551076	0.499078	0.689381	0.38112	0.496297	0.403788	0.508548	NaN	NaN	NaN	NaN	NaN
69.6948	-44.4305	0.518622	0.501746	0.450188	0.338367	0.430038	0.442392	0.536352	0.543657	0.710696	0.332581	0.503476	0.406109	0.497304	NaN	NaN	NaN	NaN	NaN
69.697	-44.4143	0.528546	0.488946	0.450167	0.406834	0.423379	0.437441	0.529232	0.570687	0.718184	0.332895	0.501356	0.399331	0.491582	NaN	NaN	NaN	NaN	NaN
69.6986	-44.4022	0.53518	0.480417	0.45672	0.487316	0.405481	0.437857	0.544667	0.571355	0.691294	0.349282	0.501581	0.397146	0.483182	NaN	NaN	NaN	NaN	NaN
69.7007	-44.386	0.54847	0.480839	0.457632	0.557367	0.380069	0.438198	0.567505	0.554061	0.664013	0.349179	0.511095	0.392525	0.4773	NaN	NaN	NaN	NaN	NaN
69.7029	-44.3697	0.561801	0.481296	0.451997	0.592946	0.357865	0.460299	0.583266	0.536995	0.637163	0.365561	0.49917	0.394783	0.468949	NaN	NaN	NaN	NaN	NaN
69.7044	-44.3574	0.568485	0.485917	0.44613	0.570346	0.3502	0.471116	0.606044	0.510621	0.630491	0.381957	0.482396	0.397008	0.46064	NaN	NaN	NaN	NaN	NaN
69.7065	-44.3411	0.568486	0.503492	0.447065	0.501872	0.338432	0.498035	0.613747	0.492939	0.609958	0.39269	0.455621	0.410382	0.452225	NaN	NaN	NaN	NaN	NaN
69.7087	-44.3247	0.561804	0.512052	0.453674	0.432752	0.345417	0.497511	0.613202	0.474664	0.616116	0.381463	0.443068	0.414481	0.457481	NaN	NaN	NaN	NaN	NaN
69.7103	-44.3124	0.551806	0.524892	0.453663	0.386672	0.360174	0.475393	0.619992	0.474277	0.608799	0.3757	0.4427	0.41193	0.462794	NaN	NaN	NaN	NaN	NaN
69.7125	-44.2959	0.541824	0.537782	0.453689	0.340749	0.367273	0.453095	0.626588	0.464843	0.60131	0.386176	0.437629	0.402584	0.482175	0.512168	0.490377	NaN	NaN	NaN
69.7146	-44.2793	0.528555	0.537322	0.47263	0.306248	0.347598	0.473781	0.625892	0.446583	0.600623	0.396683	0.437469	0.379691	0.507195	0.50188	0.482125	NaN	NaN	NaN
69.7167	-44.2628	0.518633	0.536958	0.465325	0.340006	0.32459	0.478152	0.61733	0.454714	0.593067	0.396196	0.422547	0.38378	0.512499	0.501778	0.49495	NaN	NaN	NaN
69.7184	-44.2503	0.508729	0.536594	0.47119	0.328254	0.327996	0.472327	0.594245	0.462891	0.585585	0.390291	0.42935	0.379052	0.506647	0.507895	0.500582	NaN	NaN	NaN
69.7206	-44.2338	0.502144	0.527514	0.470192	0.327619	0.342638	0.455824	0.56364	0.461951	0.584506	0.346318	0.45965	0.367486	0.50055	0.515832	0.4988	NaN	NaN	NaN
69.7228	-44.2173	0.502145	0.509923	0.469189	0.304216	0.364563	0.433881	0.547926	0.461136	0.590333	0.329724	0.463785	0.36715	0.500101	0.528047	0.494251	NaN	NaN	NaN
69.7243	-44.2049	0.502146	0.501146	0.462105	0.292425	0.379142	0.428376	0.525319	0.469413	0.5898	0.345668	0.454033	0.36691	0.499767	0.536139	0.494022	NaN	NaN	NaN
69.7264	-44.1883	0.502147	0.492396	0.455086	0.269358	0.385949	0.427938	0.502574	0.486343	0.616431	0.345686	0.446831	0.366816	0.50251	0.54039	0.494115	NaN	NaN	NaN
69.7285	-44.1718	0.502148	0.479291	0.44782	0.280136	0.389248	0.42762	0.487402	0.503465	0.62968	0.345672	0.446805	0.369064	0.505296	0.54038	0.492658	NaN	NaN	NaN
69.7302	-44.1594	0.502149	0.47928	0.447803	0.280127	0.389227	0.422132	0.479794	0.520795	0.629565	0.345633	0.449141	0.373585	0.508069	0.540304	0.492529	NaN	NaN	NaN
69.7324	-44.143	0.50215	0.479275	0.447797	0.314056	0.378314	0.400343	0.508788	0.520763	0.629514	0.345615	0.46117	0.371491	0.516563	0.538313	0.496794	NaN	NaN	NaN
69.7345	-44.1265	0.502151	0.47929	0.45435	0.348257	0.363771	0.40038	0.516275	0.529843	0.623156	0.340333	0.475763	0.374092	0.52545	0.532503	0.504247	NaN	NaN	NaN
69.7361	-44.1141	0.502152	0.479283	0.473966	0.34876	0.352818	0.400362	0.53851	0.539096	0.616878	0.340513	0.480778	0.378809	0.53126	0.528425	0.505658	NaN	NaN	NaN
69.7381	-44.0975	0.508739	0.470776	0.493591	0.349232	0.341843	0.416635	0.546342	0.55731	0.603974	0.362351	0.483664	0.385907	0.531495	0.520033	0.504041	NaN	NaN	NaN
69.7402	-44.081	0.518646	0.475455	0.488044	0.372514	0.331132	0.42779	0.56926	0.54935	0.597863	0.395177	0.477086	0.390695	0.534471	0.522167	0.495419	NaN	NaN	NaN
69.7418	-44.0687	0.518647	0.479799	0.501393	0.384446	0.327853	0.439086	0.577427	0.550051	0.59167	0.411763	0.475058	0.386269	0.539937	0.524068	0.496544	NaN	NaN	NaN
69.744	-44.0522	0.518648	0.492896	0.508747	0.396605	0.313291	0.466547	0.593344	0.560031	0.579147	0.417702	0.48523	0.368436	0.551144	0.530381	0.512075	NaN	NaN	NaN
69.7461	-44.0357	0.518649	0.501648	0.515857	0.408619	0.313799	0.483621	0.617028	0.543542	0.573306	0.407312	0.500098	0.364242	0.545771	0.547264	0.51924	NaN	NaN	NaN
69.7477	-44.0233	0.521954	0.506134	0.516363	0.420478	0.314166	0.489568	0.632674	0.544272	0.560321	0.407549	0.505135	0.378059	0.523591	0.563976	0.513475	NaN	NaN	NaN
69.7498	-44.0068	0.535206	0.502218	0.517156	0.421041	0.322183	0.484894	0.663535	0.527442	0.561028	0.402536	0.512775	0.387474	0.501594	0.585143	0.502287	NaN	NaN	NaN
69.7519	-43.9903	0.535207	0.515372	0.511311	0.432952	0.326382	0.502046	0.664772	0.501448	0.561432	0.413699	0.503389	0.392058	0.501608	0.597736	0.498002	NaN	NaN	NaN
69.7535	-43.978	0.535208	0.52416	0.51844	0.433508	0.330597	0.524776	0.635954	0.492941	0.561718	0.424808	0.491506	0.392003	0.509888	0.603982	0.499344	NaN	NaN	NaN
69.7556	-43.9615	0.535209	0.528559	0.51208	0.456623	0.338529	0.542107	0.591829	0.484118	0.568542	0.430354	0.48678	0.396574	0.51276	0.608299	0.505068	NaN	NaN	NaN
69.7577	-43.9451	0.53521	0.546197	0.486581	0.45662	0.353884	0.520632	0.56919	0.510578	0.568529	0.41941	0.491495	0.403422	0.504449	0.614615	0.509323	NaN	NaN	NaN
69.7593	-43.9327	0.535211	0.546205	0.486593	0.421975	0.368845	0.515286	0.554166	0.501415	0.575036	0.41383	0.496196	0.40571	0.504526	0.614747	0.51368	NaN	NaN	NaN
69.7614	-43.9162	0.535212	0.5462	0.486587	0.387387	0.379929	0.515269	0.554142	0.483531	0.567941	0.424502	0.488806	0.414678	0.504478	0.614666	0.51503	NaN	NaN	NaN
69.7635	-43.8997	0.52858	0.554795	0.486595	0.341385	0.394701	0.493139	0.583666	0.483552	0.547533	0.418834	0.498279	0.414705	0.504528	0.614751	0.515102	NaN	NaN	NaN
69.7651	-43.8874	0.518659	0.567674	0.486588	0.34138	0.387001	0.487271	0.60575	0.456761	0.553954	0.429569	0.493381	0.41917	0.504469	0.614651	0.515018	NaN	NaN	NaN
69.7672	-43.8709	0.51866	0.563251	0.492977	0.341385	0.375488	0.486799	0.597726	0.474155	0.567352	0.429587	0.486122	0.425941	0.51571	0.60637	0.512251	NaN	NaN	NaN
69.7693	-43.8544	0.515355	0.549885	0.518476	0.341397	0.375504	0.486838	0.590267	0.483003	0.567431	0.429638	0.486196	0.426013	0.518643	0.604488	0.508177	NaN	NaN	NaN
69.7708	-43.842	0.505462	0.562768	0.518493	0.341406	0.375517	0.486868	0.59032	0.483043	0.567491	0.429677	0.486252	0.430652	0.521619	0.596256	0.505463	NaN	NaN	NaN
69.7729	-43.8255	0.502172	0.567042	0.498597	0.375388	0.375496	0.486818	0.590233	0.482976	0.567391	0.413238	0.495667	0.435184	0.518753	0.58126	0.505186	NaN	NaN	NaN
69.7751	-43.809	0.502173	0.549366	0.5108	0.386517	0.379181	0.486808	0.590214	0.482962	0.56737	0.402324	0.510088	0.426162	0.513115	0.572716	0.503652	NaN	NaN	NaN
69.7767	-43.7966	0.502174	0.544953	0.517137	0.352066	0.390227	0.48679	0.590183	0.482938	0.567334	0.407752	0.514988	0.41709	0.504626	0.570423	0.503514	NaN	NaN	NaN
69.7788	-43.78	0.502175	0.544973	0.517168	0.340623	0.393934	0.486848	0.582754	0.49182	0.56745	0.42965	0.510532	0.39896	0.504606	0.570543	0.502275	NaN	NaN	NaN
69.7808	-43.7635	0.502176	0.544982	0.517184	0.340632	0.382432	0.502955	0.552725	0.527074	0.567509	0.429687	0.505722	0.378364	0.509915	0.57889	0.50517	NaN	NaN	NaN
69.7824	-43.751	0.512061	0.532156	0.517202	0.340642	0.374781	0.513698	0.530246	0.580416	0.547502	0.446129	0.486537	0.373666	0.506974	0.589407	0.50953	NaN	NaN	NaN
69.7845	-43.7344	0.521973	0.519333	0.523827	0.340806	0.371111	0.513725	0.515284	0.616051	0.534159	0.440693	0.471934	0.375726	0.492854	0.599807	0.513818	NaN	NaN	NaN
69.7866	-43.7178	0.535225	0.502246	0.550327	0.341429	0.356367	0.513723	0.507785	0.588978	0.560935	0.407915	0.461827	0.386748	0.481502	0.601658	0.512285	NaN	NaN	NaN
69.7887	-43.7011	0.548513	0.485189	0.563596	0.31876	0.356369	0.491632	0.477305	0.552054	0.613971	0.36408	0.46345	0.395444	0.472907	0.597161	0.503638	NaN	NaN	NaN
69.7902	-43.6886	0.558507	0.472417	0.583553	0.284716	0.356381	0.44759	0.461328	0.541809	0.660292	0.342134	0.465377	0.386089	0.483762	0.590773	0.496556	NaN	NaN	NaN
69.7923	-43.672	0.568527	0.455303	0.556752	0.295545	0.359673	0.37052	0.496231	0.49591	0.719455	0.330866	0.467255	0.379036	0.494761	0.580426	0.491099	NaN	NaN	NaN
69.7945	-43.6553	0.568528	0.437897	0.509336	0.305498	0.377301	0.320927	0.531186	0.45063	0.758142	0.324961	0.464209	0.387747	0.477819	0.58223	0.488151	NaN	NaN	NaN
69.796	-43.6428	0.568529	0.4379	0.417339	0.383092	0.383842	0.314959	0.537606	0.432457	0.743251	0.340581	0.463794	0.389784	0.472088	0.584179	0.48669	NaN	NaN	NaN
69.7982	-43.6261	0.561847	0.433347	0.371069	0.415253	0.382708	0.330394	0.529522	0.431846	0.708285	0.35067	0.46078	0.396209	0.469055	0.586033	0.485152	NaN	NaN	NaN
69.7992	-43.6124	0.541868	0.450112	0.383696	0.392565	0.371004	0.351449	0.507228	0.466512	0.654093	0.355529	0.460339	0.39597	0.474485	0.588213	0.483859	NaN	NaN	NaN
69.8007	-43.6001	0.525289	0.458293	0.402643	0.392611	0.371051	0.367767	0.478291	0.475311	0.627297	0.371508	0.450818	0.398205	0.485811	0.582425	0.48711	NaN	NaN	NaN
69.8028	-43.5837	0.502183	0.479318	0.389216	0.437272	0.371076	0.373229	0.471122	0.484185	0.620827	0.371567	0.446098	0.391382	0.499764	0.58272	0.487355	NaN	NaN	NaN
69.8049	-43.5674	0.482483	0.504831	0.382721	0.493936	0.356495	0.389515	0.478954	0.484723	0.60786	0.366316	0.448568	0.384637	0.508093	0.586992	0.481707	NaN	NaN	NaN
69.8064	-43.5552	0.472668	0.51759	0.4022	0.506033	0.349464	0.389756	0.49397	0.476351	0.628473	0.350508	0.451084	0.375617	0.516266	0.588866	0.480076	NaN	NaN	NaN
69.8084	-43.5388	0.469404	0.521834	0.434761	0.507212	0.342566	0.38469	0.531295	0.450743	0.656094	0.340231	0.456246	0.364518	0.521798	0.595094	0.475716	NaN	NaN	NaN
69.8104	-43.5224	0.469405	0.521832	0.480519	0.474496	0.339321	0.3851	0.561539	0.433948	0.670468	0.340697	0.463981	0.353559	0.524781	0.603725	0.468748	NaN	NaN	NaN
69.8133	-43.506	0.469406	0.521809	0.506718	0.463872	0.335904	0.385317	0.58413	0.434445	0.671029	0.346374	0.466694	0.346924	0.527477	0.607712	0.464308	NaN	NaN	NaN
69.8153	-43.4899	0.479213	0.513397	0.506969	0.452588	0.347322	0.385698	0.606987	0.426252	0.678484	0.357561	0.46718	0.342626	0.533151	0.603457	0.46138	NaN	NaN	NaN
69.8173	-43.4739	0.485769	0.522402	0.481723	0.452567	0.354943	0.385934	0.622247	0.435495	0.679139	0.374139	0.467671	0.340598	0.536094	0.588669	0.465473	NaN	NaN	NaN
69.8187	-43.4618	0.495615	0.509603	0.488271	0.441301	0.358746	0.396967	0.622735	0.453495	0.672973	0.385255	0.470446	0.334003	0.541733	0.575995	0.465341	NaN	NaN	NaN
69.8207	-43.4456	0.502198	0.501081	0.514581	0.396257	0.374042	0.37567	0.637742	0.48923	0.667067	0.396513	0.47337	0.318418	0.555829	0.563549	0.465376	NaN	NaN	NaN
69.8227	-43.4295	0.502199	0.50983	0.521691	0.40827	0.36315	0.392167	0.630931	0.516239	0.654182	0.402219	0.483359	0.298295	0.558505	0.55289	0.470839	NaN	NaN	NaN
69.8242	-43.4173	0.512083	0.510197	0.515903	0.420125	0.363593	0.381634	0.62361	0.551884	0.647921	0.402441	0.485995	0.289367	0.558504	0.550784	0.469415	NaN	NaN	NaN
69.8262	-43.4011	0.518691	0.501666	0.542326	0.409406	0.356368	0.376301	0.623627	0.569758	0.63455	0.40245	0.476297	0.298302	0.544517	0.554898	0.465179	NaN	NaN	NaN
69.8282	-43.3848	0.518692	0.501666	0.548944	0.398081	0.348705	0.386976	0.623626	0.569757	0.614057	0.418589	0.456896	0.307102	0.530351	0.565177	0.460897	NaN	NaN	NaN
69.8297	-43.3726	0.518693	0.50167	0.548953	0.386582	0.340923	0.402979	0.623652	0.543	0.606866	0.440126	0.439966	0.318205	0.516336	0.573468	0.456679	NaN	NaN	NaN
69.8317	-43.3563	0.518694	0.501683	0.54898	0.340675	0.340382	0.424329	0.616234	0.516207	0.592809	0.461543	0.422984	0.327003	0.510696	0.579805	0.45256	NaN	NaN	NaN
69.8338	-43.3399	0.518695	0.501678	0.548969	0.294854	0.347448	0.418548	0.60816	0.50675	0.578504	0.477295	0.420291	0.324542	0.507596	0.585825	0.448211	NaN	NaN	NaN
69.8353	-43.3276	0.518696	0.501672	0.54234	0.271866	0.347013	0.423561	0.607748	0.488706	0.577936	0.482358	0.422486	0.317662	0.510112	0.587704	0.44669	NaN	NaN	NaN
69.8373	-43.3112	0.518697	0.501672	0.515922	0.282765	0.354199	0.417946	0.577494	0.496798	0.584054	0.476527	0.434233	0.299591	0.523725	0.585493	0.446631	NaN	NaN	NaN
69.8393	-43.2949	0.518698	0.501681	0.50934	0.259854	0.3652	0.401604	0.54721	0.522503	0.597152	0.460032	0.438784	0.290503	0.534713	0.583456	0.446693	NaN	NaN	NaN
69.8408	-43.2826	0.512092	0.510225	0.489586	0.270876	0.372526	0.385273	0.539326	0.548582	0.60387	0.438287	0.438565	0.292655	0.534688	0.587733	0.443969	NaN	NaN	NaN
69.8429	-43.2664	0.50221	0.523039	0.483023	0.282126	0.357303	0.395638	0.516759	0.556772	0.630548	0.416576	0.426291	0.303661	0.540223	0.583612	0.446844	NaN	NaN	NaN
69.8449	-43.2501	0.502211	0.523037	0.45672	0.327092	0.345889	0.395209	0.531112	0.565471	0.630526	0.400276	0.423673	0.31028	0.531759	0.589779	0.443985	NaN	NaN	NaN
69.8464	-43.2379	0.502212	0.509862	0.46913	0.338316	0.334493	0.400211	0.567892	0.539299	0.630493	0.38399	0.440321	0.301385	0.528921	0.591795	0.443942	NaN	NaN	NaN
69.8483	-43.2217	0.502213	0.501105	0.481761	0.338318	0.334495	0.400215	0.59768	0.504442	0.630505	0.373162	0.466741	0.281403	0.528939	0.591822	0.441147	NaN	NaN	NaN
69.8502	-43.2054	0.502214	0.501109	0.481767	0.338322	0.338294	0.394932	0.620084	0.478309	0.630536	0.373174	0.471597	0.279222	0.526234	0.591886	0.43697	NaN	NaN	NaN
69.8517	-43.1933	0.502215	0.501104	0.481759	0.372513	0.338715	0.379032	0.620042	0.478281	0.630482	0.373153	0.471559	0.285962	0.517916	0.591778	0.4369	NaN	NaN	NaN
69.8537	-43.1771	0.502216	0.501098	0.48175	0.395354	0.354215	0.347217	0.590174	0.513107	0.630425	0.37313	0.457024	0.303783	0.520716	0.585427	0.436826	NaN	NaN	NaN
69.8558	-43.1609	0.502217	0.501095	0.481745	0.395349	0.373288	0.320667	0.582709	0.521798	0.630393	0.373117	0.454589	0.315021	0.515263	0.581208	0.436785	NaN	NaN	NaN
69.8577	-43.1447	0.502218	0.501094	0.508029	0.350363	0.36565	0.331287	0.582701	0.521791	0.630381	0.373112	0.471486	0.299453	0.515249	0.581187	0.436771	NaN	NaN	NaN
69.8592	-43.1325	0.502219	0.501083	0.514594	0.33909	0.346577	0.35779	0.582631	0.521727	0.609915	0.394507	0.45941	0.30605	0.517859	0.580988	0.436637	NaN	NaN	NaN
69.8611	-43.1163	0.50222	0.501086	0.5146	0.339093	0.327565	0.384285	0.582646	0.52174	0.59638	0.426903	0.435583	0.310364	0.528877	0.581033	0.440881	NaN	NaN	NaN
69.8631	-43.1	0.502221	0.501092	0.514612	0.327682	0.327438	0.389593	0.582682	0.521773	0.596427	0.42693	0.435615	0.310384	0.520579	0.581043	0.447941	NaN	NaN	NaN
69.8646	-43.0878	0.502222	0.501092	0.494875	0.327229	0.349818	0.3737	0.582677	0.521768	0.59642	0.443228	0.428581	0.310381	0.514991	0.580966	0.453531	NaN	NaN	NaN
69.8666	-43.0714	0.502223	0.501089	0.48174	0.338301	0.357271	0.368398	0.58266	0.521752	0.596397	0.454096	0.423878	0.310371	0.514959	0.580918	0.459127	NaN	NaN	NaN
69.8686	-43.0551	0.502224	0.501078	0.481722	0.338289	0.372488	0.352594	0.57533	0.521687	0.596304	0.454035	0.423817	0.312585	0.512077	0.582822	0.463213	NaN	NaN	NaN
69.8701	-43.0428	0.502225	0.501074	0.488278	0.32706	0.376292	0.363577	0.553516	0.521659	0.603038	0.464984	0.416763	0.319336	0.503794	0.589059	0.461785	NaN	NaN	NaN
69.872	-43.0264	0.502226	0.501064	0.514562	0.282093	0.391539	0.347751	0.546191	0.521598	0.630074	0.454393	0.414427	0.319331	0.51206	0.582673	0.46447	NaN	NaN	NaN
69.8741	-43.0097	0.502228	0.501058	0.514551	0.282088	0.391528	0.34774	0.546155	0.521561	0.630016	0.448916	0.433595	0.303759	0.514768	0.580487	0.464384	NaN	NaN	NaN
69.8756	-42.9974	0.502229	0.501052	0.507959	0.293332	0.391519	0.347728	0.546122	0.521527	0.629961	0.432574	0.452652	0.290382	0.517438	0.578279	0.465697	NaN	NaN	NaN
69.8776	-42.981	0.50223	0.501065	0.462024	0.371952	0.391539	0.347751	0.54619	0.521597	0.630073	0.4272	0.457485	0.279194	0.528564	0.570082	0.471439	NaN	NaN	NaN
69.8795	-42.9645	0.502231	0.501083	0.448956	0.394398	0.391569	0.336915	0.560818	0.548268	0.6103	0.40556	0.452486	0.290316	0.520376	0.57868	0.466046	NaN	NaN	NaN
69.881	-42.9521	0.502232	0.501087	0.462058	0.371981	0.387755	0.325956	0.582623	0.548292	0.603547	0.389233	0.447408	0.29689	0.517507	0.587054	0.460467	NaN	NaN	NaN
69.883	-42.9357	0.495652	0.509611	0.501443	0.304603	0.372497	0.341749	0.574996	0.539136	0.596335	0.372686	0.449323	0.303441	0.511788	0.59741	0.450598	NaN	NaN	NaN
69.885	-42.9192	0.485808	0.522401	0.514609	0.282111	0.36107	0.335976	0.58172	0.547553	0.609623	0.329509	0.460806	0.303344	0.508891	0.595195	0.44633	NaN	NaN	NaN
69.8865	-42.9068	0.485809	0.522408	0.501457	0.30461	0.35347	0.346572	0.581754	0.512202	0.629432	0.307927	0.465293	0.303258	0.508827	0.588869	0.446314	NaN	NaN	NaN
69.8885	-42.8903	0.48581	0.522414	0.468634	0.326616	0.349237	0.351496	0.573822	0.511679	0.628889	0.291576	0.481672	0.298773	0.508804	0.578366	0.444879	NaN	NaN	NaN
69.8904	-42.8737	0.485811	0.522421	0.448992	0.337518	0.352745	0.345972	0.580918	0.485111	0.635125	0.280692	0.493381	0.289792	0.511489	0.574167	0.443481	NaN	NaN	NaN
69.8919	-42.8613	0.485813	0.522417	0.429358	0.371116	0.345148	0.356533	0.580889	0.476283	0.621385	0.29659	0.488524	0.29196	0.514174	0.569877	0.439182	NaN	NaN	NaN
69.8939	-42.8447	0.485814	0.522417	0.416299	0.393486	0.333779	0.372367	0.580886	0.47628	0.594335	0.328543	0.476626	0.298605	0.514168	0.56987	0.432158	NaN	NaN	NaN
69.8959	-42.8281	0.485815	0.522412	0.43589	0.359915	0.348936	0.351239	0.580855	0.476256	0.594294	0.344662	0.469594	0.298588	0.50576	0.576002	0.429296	NaN	NaN	NaN
69.8974	-42.8157	0.485816	0.522396	0.448962	0.371606	0.341768	0.345927	0.580765	0.493797	0.580961	0.344618	0.471908	0.296325	0.500034	0.579891	0.42913	NaN	NaN	NaN
69.8994	-42.7991	0.485817	0.522397	0.462058	0.371977	0.349652	0.330191	0.573535	0.520263	0.574624	0.334004	0.481549	0.287467	0.497264	0.581975	0.433342	NaN	NaN	NaN
69.9013	-42.7825	0.485818	0.522404	0.48175	0.338302	0.364878	0.330677	0.544611	0.520295	0.594936	0.318091	0.481587	0.280743	0.494423	0.590367	0.439021	NaN	NaN	NaN
69.9028	-42.7701	0.485819	0.522393	0.481735	0.338292	0.372484	0.32006	0.544555	0.520237	0.594853	0.318064	0.474289	0.282862	0.499773	0.590179	0.443107	NaN	NaN	NaN
69.9048	-42.7535	0.48582	0.51361	0.494347	0.315515	0.379785	0.320048	0.544515	0.502551	0.601268	0.31798	0.462136	0.296116	0.499691	0.590048	0.448631	NaN	NaN	NaN
69.9068	-42.7369	0.485821	0.500481	0.487009	0.314927	0.37915	0.33041	0.544183	0.475879	0.607317	0.306993	0.464098	0.307185	0.505263	0.592252	0.445889	NaN	NaN	NaN
69.9083	-42.7244	0.4891	0.496238	0.467382	0.314485	0.374882	0.32995	0.550937	0.475517	0.627201	0.290934	0.46872	0.309422	0.516464	0.588306	0.443199	NaN	NaN	NaN
69.9102	-42.7078	0.502248	0.479238	0.447784	0.302705	0.370456	0.323962	0.594292	0.475525	0.627216	0.290938	0.473539	0.305002	0.530403	0.582187	0.439039	NaN	NaN	NaN
69.9122	-42.6911	0.502249	0.466162	0.46665	0.2801	0.370138	0.318336	0.615937	0.475517	0.627202	0.307009	0.478575	0.300674	0.536095	0.578114	0.426445	NaN	NaN	NaN
69.9137	-42.6785	0.50225	0.457462	0.492258	0.257771	0.370126	0.318323	0.615879	0.484265	0.640803	0.323283	0.476576	0.296321	0.536123	0.571755	0.416554	NaN	NaN	NaN
69.9157	-42.6618	0.502251	0.457472	0.518469	0.235647	0.374254	0.334872	0.58746	0.51984	0.62829	0.34511	0.470035	0.296531	0.525363	0.56359	0.40686	NaN	NaN	NaN
69.9178	-42.645	0.502252	0.457478	0.544733	0.258756	0.379019	0.335735	0.588785	0.503212	0.615541	0.366916	0.460951	0.298905	0.506123	0.553099	0.401232	NaN	NaN	NaN
69.9192	-42.6324	0.492388	0.470196	0.544739	0.326906	0.376166	0.330917	0.596979	0.486232	0.595669	0.388541	0.45161	0.298911	0.489464	0.548747	0.401148	NaN	NaN	NaN
69.9212	-42.6155	0.485829	0.461266	0.569844	0.395355	0.37328	0.309804	0.59717	0.468707	0.602305	0.399369	0.434894	0.296493	0.478119	0.542151	0.402374	NaN	NaN	NaN
69.9232	-42.5986	0.48583	0.456926	0.569536	0.360924	0.380297	0.293358	0.588804	0.467955	0.635301	0.383061	0.415397	0.296083	0.480395	0.541807	0.405016	NaN	NaN	NaN
69.9252	-42.5817	0.485832	0.456927	0.5433	0.314792	0.375219	0.292416	0.579736	0.484238	0.654412	0.371877	0.400555	0.297874	0.482653	0.551932	0.403538	NaN	NaN	NaN
69.9267	-42.569	0.485833	0.456939	0.52368	0.269077	0.37793	0.291797	0.571316	0.465804	0.686983	0.360846	0.395442	0.30661	0.474316	0.564514	0.400872	NaN	NaN	NaN
69.9288	-42.552	0.485834	0.456943	0.510616	0.22372	0.373175	0.312542	0.548646	0.465041	0.692794	0.344345	0.41408	0.30438	0.47155	0.568724	0.400918	NaN	NaN	NaN
69.9307	-42.535	0.485835	0.456934	0.510598	0.246246	0.365912	0.317901	0.541392	0.500042	0.666263	0.317464	0.447225	0.286711	0.479784	0.560274	0.407789	NaN	NaN	NaN
69.9322	-42.5221	0.485836	0.456908	0.530153	0.269192	0.362859	0.318319	0.541918	0.518017	0.626345	0.31738	0.461437	0.28009	0.487878	0.553659	0.410287	NaN	NaN	NaN
69.9342	-42.5051	0.485837	0.456891	0.556319	0.281025	0.367401	0.318982	0.557625	0.519063	0.586873	0.322821	0.46154	0.28237	0.490602	0.553499	0.412936	NaN	NaN	NaN
69.9362	-42.4882	0.485838	0.456891	0.576014	0.281426	0.371665	0.31944	0.573135	0.502289	0.580688	0.317652	0.454481	0.289061	0.485146	0.557673	0.418538	NaN	NaN	NaN
69.9377	-42.4755	0.495683	0.444213	0.576014	0.304132	0.364371	0.30324	0.602237	0.493612	0.580684	0.31765	0.44488	0.291165	0.487777	0.555507	0.425472	NaN	NaN	NaN
69.9397	-42.4585	0.502265	0.435774	0.549801	0.383178	0.334438	0.313501	0.58695	0.484225	0.593453	0.322798	0.435171	0.28425	0.490287	0.551293	0.438088	NaN	NaN	NaN
69.9417	-42.4415	0.502266	0.431454	0.523357	0.382271	0.322402	0.323362	0.563738	0.465532	0.585232	0.364923	0.422981	0.283978	0.484486	0.561594	0.438147	NaN	NaN	NaN
69.9431	-42.4288	0.502267	0.418494	0.515998	0.358858	0.32536	0.328151	0.548303	0.438542	0.590694	0.391161	0.413237	0.292702	0.476122	0.574065	0.431219	NaN	NaN	NaN
69.9451	-42.4118	0.502268	0.41418	0.489656	0.335395	0.328137	0.338149	0.540224	0.429187	0.623347	0.396444	0.40845	0.2971	0.470579	0.584455	0.417258	NaN	NaN	NaN
69.9472	-42.3948	0.502269	0.414178	0.47665	0.335063	0.331611	0.343383	0.554917	0.446868	0.610502	0.401977	0.413419	0.297272	0.479053	0.574191	0.406096	NaN	NaN	NaN
69.9487	-42.382	0.50227	0.414174	0.483138	0.346509	0.33566	0.333011	0.584543	0.473718	0.591483	0.391607	0.420764	0.292985	0.492986	0.5618	0.401881	NaN	NaN	NaN
69.9506	-42.3649	0.502271	0.414165	0.515674	0.358663	0.332736	0.328231	0.59999	0.50959	0.579349	0.370679	0.428154	0.290947	0.495873	0.54925	0.404543	NaN	NaN	NaN
69.9526	-42.3478	0.502272	0.414157	0.541766	0.336661	0.351918	0.312901	0.61549	0.483996	0.593146	0.344134	0.442461	0.293359	0.487744	0.540827	0.414173	NaN	NaN	NaN
69.9541	-42.3349	0.502273	0.414148	0.561352	0.303126	0.367063	0.297183	0.615588	0.475275	0.593033	0.344091	0.444778	0.297833	0.484957	0.536502	0.422388	NaN	NaN	NaN
69.9561	-42.3177	0.502274	0.414145	0.574446	0.280745	0.370853	0.291902	0.593354	0.483636	0.585984	0.338501	0.454049	0.293335	0.484827	0.548901	0.430776	NaN	NaN	NaN
69.9582	-42.3005	0.502275	0.414149	0.567906	0.246696	0.37402	0.302344	0.585812	0.448328	0.591887	0.359616	0.444417	0.290936	0.484621	0.569694	0.437882	NaN	NaN	NaN
69.9597	-42.2875	0.502276	0.414148	0.548274	0.268917	0.366281	0.302008	0.592615	0.421846	0.611303	0.37019	0.434828	0.28855	0.484378	0.588336	0.439316	NaN	NaN	NaN
69.9617	-42.2702	0.502277	0.414144	0.52214	0.313544	0.347363	0.317545	0.570064	0.447414	0.624387	0.386282	0.425438	0.286256	0.495266	0.594578	0.44071	NaN	NaN	NaN
69.9637	-42.2528	0.502278	0.414144	0.48307	0.346459	0.343146	0.338546	0.547972	0.499486	0.60467	0.413187	0.425784	0.286427	0.514858	0.582415	0.437999	NaN	NaN	NaN
69.9652	-42.2398	0.502279	0.414147	0.476581	0.335014	0.350391	0.354685	0.511741	0.56942	0.592131	0.418943	0.433335	0.291195	0.518133	0.563994	0.435274	NaN	NaN	NaN
69.9672	-42.2223	0.50228	0.427102	0.496902	0.313395	0.347233	0.376663	0.557088	0.527593	0.633816	0.371584	0.448127	0.284859	0.518584	0.545536	0.432549	NaN	NaN	NaN
69.9692	-42.2049	0.502281	0.435761	0.543211	0.314765	0.352356	0.367232	0.603115	0.44143	0.654783	0.345162	0.457915	0.273851	0.510362	0.537188	0.432518	NaN	NaN	NaN
69.9707	-42.1918	0.502282	0.435758	0.569439	0.326722	0.364501	0.341172	0.581365	0.467789	0.628121	0.34508	0.450605	0.271472	0.499004	0.543112	0.429589	NaN	NaN	NaN
69.9727	-42.1742	0.502283	0.435758	0.562874	0.337941	0.368304	0.314241	0.558406	0.502083	0.593901	0.349895	0.438098	0.271089	0.479111	0.559198	0.425228	NaN	NaN	NaN
69.9747	-42.1567	0.489138	0.452674	0.523601	0.302981	0.336635	0.317702	0.592575	0.544573	0.525928	0.375637	0.418246	0.290636	0.45676	0.567183	0.418205	NaN	NaN	NaN
69.9763	-42.1435	0.485861	0.452581	0.490726	0.27957	0.335528	0.284666	0.656436	0.517593	0.505018	0.390955	0.405889	0.312648	0.434862	0.567261	0.412759	NaN	NaN	NaN
69.9783	-42.1259	0.485862	0.435262	0.463683	0.300974	0.368557	0.21567	0.683827	0.472968	0.55046	0.374554	0.398291	0.319003	0.426398	0.556559	0.405637	NaN	NaN	NaN
69.9803	-42.1083	0.485863	0.422298	0.443502	0.367523	0.361013	0.220827	0.654092	0.446123	0.582806	0.390406	0.393536	0.305492	0.434329	0.537604	0.397081	NaN	NaN	NaN
69.9818	-42.0951	0.485864	0.413675	0.443011	0.389664	0.338412	0.252188	0.646698	0.428561	0.58233	0.427726	0.384264	0.296532	0.439628	0.520801	0.392716	NaN	NaN	NaN
69.9838	-42.0775	0.479311	0.422093	0.449474	0.378594	0.315876	0.29948	0.603165	0.419487	0.581725	0.486603	0.358536	0.287442	0.444768	0.512249	0.385597	NaN	NaN	NaN
69.9858	-42.0599	0.469507	0.434724	0.475387	0.334257	0.312131	0.315372	0.574195	0.410558	0.574609	0.524026	0.339721	0.293959	0.425481	0.51821	0.379971	NaN	NaN	NaN
69.9873	-42.0467	0.469508	0.43472	0.494841	0.28972	0.315737	0.315363	0.574159	0.384523	0.587468	0.518457	0.334842	0.302716	0.406258	0.530359	0.378514	NaN	NaN	NaN
69.9893	-42.0291	0.469509	0.434708	0.507814	0.222614	0.330141	0.315338	0.574058	0.384472	0.587337	0.480558	0.34623	0.313747	0.398053	0.536359	0.375641	NaN	NaN	NaN
69.9913	-42.0117	0.46951	0.434684	0.533781	0.178195	0.341353	0.299642	0.581189	0.375829	0.607105	0.410825	0.373936	0.32936	0.398166	0.534114	0.372706	NaN	NaN	NaN
69.9934	-41.9944	0.469511	0.434673	0.533752	0.178191	0.348846	0.299843	0.596172	0.341611	0.620341	0.34679	0.408794	0.329509	0.395518	0.546499	0.369956	NaN	NaN	NaN
69.9948	-41.9816	0.469512	0.434675	0.514234	0.211503	0.360124	0.300195	0.57474	0.35026	0.61384	0.30953	0.436825	0.325252	0.403845	0.548841	0.367314	NaN	NaN	NaN
69.9968	-41.9644	0.469513	0.417415	0.532595	0.245007	0.360442	0.30041	0.589797	0.350666	0.587706	0.272372	0.460063	0.318646	0.422974	0.54487	0.367354	NaN	NaN	NaN
69.9987	-41.9474	0.469514	0.413114	0.538806	0.27871	0.349617	0.316467	0.575687	0.385448	0.561773	0.251256	0.476524	0.309868	0.414784	0.555221	0.364643	NaN	NaN	NaN
70.0001	-41.9347	0.469515	0.413107	0.538785	0.312451	0.338766	0.31645	0.575618	0.420172	0.555587	0.219684	0.483348	0.309827	0.414695	0.555037	0.364549	NaN	NaN	NaN
70.0021	-41.9177	0.469516	0.413086	0.538722	0.334968	0.331492	0.316401	0.575424	0.428755	0.555504	0.224971	0.469008	0.318493	0.411713	0.550333	0.368382	NaN	NaN	NaN
70.004	-41.9009	0.469517	0.413093	0.538743	0.334978	0.32398	0.310831	0.596954	0.428791	0.555571	0.235554	0.462088	0.311784	0.411628	0.552416	0.372564	NaN	NaN	NaN
70.0054	-41.8883	0.469519	0.413094	0.538749	0.312434	0.319949	0.315821	0.589218	0.428426	0.575179	0.235556	0.454958	0.309438	0.416947	0.550297	0.376682	NaN	NaN	NaN
70.0073	-41.8714	0.46952	0.413097	0.538755	0.278691	0.319525	0.326145	0.581706	0.367471	0.607224	0.267085	0.443241	0.304864	0.416764	0.558467	0.380838	NaN	NaN	NaN
70.0092	-41.8546	0.469521	0.413097	0.519268	0.267062	0.326454	0.315222	0.602921	0.315552	0.646166	0.288222	0.42921	0.306973	0.413945	0.564581	0.391903	NaN	NaN	NaN
70.0106	-41.8419	0.469522	0.413094	0.506295	0.278	0.318812	0.330847	0.580886	0.341124	0.646117	0.288211	0.429182	0.313648	0.405839	0.570736	0.402984	NaN	NaN	NaN
70.0125	-41.8251	0.469523	0.408784	0.512486	0.26678	0.314926	0.341241	0.573513	0.384191	0.619974	0.293496	0.42684	0.327018	0.403285	0.577031	0.414121	NaN	NaN	NaN
70.0144	-41.8083	0.469524	0.39161	0.511339	0.288629	0.322115	0.341233	0.573487	0.418811	0.620578	0.293749	0.424743	0.331598	0.417101	0.57942	0.423969	NaN	NaN	NaN
70.0158	-41.7957	0.469525	0.391611	0.504881	0.333317	0.311323	0.341237	0.573498	0.453534	0.621232	0.272774	0.434259	0.327301	0.436349	0.588132	0.424195	NaN	NaN	NaN
70.0177	-41.779	0.482606	0.379154	0.498704	0.333319	0.315063	0.357395	0.566945	0.471347	0.635438	0.257265	0.441714	0.32536	0.45581	0.601181	0.41616	NaN	NaN	NaN
70.0196	-41.7623	0.485886	0.392104	0.493309	0.333807	0.322967	0.352703	0.574973	0.463268	0.656118	0.236398	0.458565	0.32796	0.458921	0.605602	0.40236	NaN	NaN	NaN
70.021	-41.7497	0.485887	0.404979	0.494106	0.334287	0.323376	0.358432	0.59033	0.455283	0.656783	0.231322	0.470718	0.332743	0.448245	0.603473	0.391199	NaN	NaN	NaN
70.0229	-41.7331	0.485888	0.430847	0.495729	0.323998	0.327847	0.353882	0.642958	0.404444	0.637609	0.242096	0.485491	0.339933	0.418643	0.591116	0.377351	NaN	NaN	NaN
70.0248	-41.7164	0.48589	0.452496	0.503604	0.313645	0.336109	0.344057	0.658867	0.396522	0.598268	0.263386	0.490663	0.340207	0.380593	0.576373	0.367547	NaN	NaN	NaN
70.0262	-41.7039	0.485891	0.456836	0.530002	0.291754	0.336544	0.344436	0.652078	0.388004	0.578269	0.273923	0.485869	0.33563	0.361348	0.573893	0.357723	NaN	NaN	NaN
70.028	-41.6872	0.485892	0.452497	0.549357	0.280709	0.325357	0.349565	0.607463	0.448397	0.531389	0.284157	0.473505	0.339728	0.328442	0.575255	0.34783	NaN	NaN	NaN
70.0299	-41.6705	0.482614	0.435084	0.547914	0.268753	0.309488	0.364402	0.554663	0.507828	0.510562	0.288888	0.453784	0.359296	0.306575	0.566594	0.339417	NaN	NaN	NaN
70.0313	-41.658	0.472799	0.426132	0.526933	0.267743	0.300934	0.36841	0.516503	0.514589	0.548966	0.293792	0.439118	0.365579	0.295558	0.562221	0.337959	NaN	NaN	NaN
70.0332	-41.6413	0.453237	0.416898	0.485849	0.310638	0.292167	0.334781	0.513505	0.468544	0.652461	0.293383	0.424436	0.362839	0.300661	0.553804	0.342023	NaN	NaN	NaN
70.0351	-41.6245	0.430539	0.411876	0.458011	0.319894	0.294429	0.307051	0.510882	0.414842	0.749177	0.308941	0.417186	0.355927	0.31943	0.551967	0.342126	NaN	NaN	NaN
70.0365	-41.612	0.420784	0.41156	0.444431	0.330184	0.290186	0.311709	0.495722	0.405492	0.787995	0.324803	0.424477	0.356171	0.325028	0.552286	0.34087	NaN	NaN	NaN
70.0384	-41.5952	0.420785	0.420135	0.425725	0.329996	0.290035	0.322109	0.495821	0.439896	0.788822	0.330443	0.44626	0.363513	0.330939	0.548608	0.342377	NaN	NaN	NaN
70.0402	-41.5784	0.42731	0.433258	0.4141	0.319369	0.301407	0.333325	0.504229	0.484083	0.76445	0.32041	0.477767	0.357584	0.36409	0.539027	0.341219	NaN	NaN	NaN
70.0415	-41.5658	0.440258	0.437993	0.421657	0.298052	0.309368	0.339392	0.534404	0.476957	0.745947	0.304861	0.504269	0.346852	0.402566	0.520767	0.343997	NaN	NaN	NaN
70.0433	-41.5491	0.453248	0.43411	0.461019	0.277029	0.321536	0.35136	0.551169	0.470219	0.728081	0.257589	0.542679	0.349734	0.44159	0.49669	0.338657	NaN	NaN	NaN
70.0453	-41.5322	0.466277	0.434541	0.487932	0.266927	0.341276	0.34763	0.56783	0.47199	0.689948	0.220779	0.573932	0.375073	0.447945	0.482844	0.323708	NaN	NaN	NaN
70.0468	-41.5197	0.469544	0.434647	0.514173	0.256345	0.356921	0.337935	0.583643	0.464327	0.670875	0.199747	0.590782	0.388932	0.445612	0.466545	0.316854	NaN	NaN	NaN
70.0486	-41.5029	0.469545	0.434649	0.540212	0.268098	0.365251	0.338814	0.562874	0.473599	0.631299	0.205004	0.598038	0.375472	0.462094	0.433559	0.319466	NaN	NaN	NaN
70.0504	-41.486	0.469546	0.43465	0.540217	0.279368	0.36541	0.349704	0.511908	0.499306	0.577452	0.252326	0.583568	0.35489	0.483667	0.410736	0.320637	NaN	NaN	NaN
70.0517	-41.4733	0.469547	0.434648	0.533695	0.2905	0.35031	0.370708	0.460575	0.524509	0.5234	0.320728	0.557126	0.354484	0.474946	0.41452	0.314992	NaN	NaN	NaN
70.0536	-41.4563	0.469549	0.426016	0.507138	0.323387	0.331057	0.412662	0.387594	0.523014	0.455735	0.436561	0.516494	0.3539	0.460621	0.42231	0.309343	NaN	NaN	NaN
70.0555	-41.4394	0.46955	0.413099	0.486883	0.333663	0.31909	0.449134	0.322121	0.495413	0.414674	0.509584	0.48975	0.335282	0.473482	0.419817	0.315984	NaN	NaN	NaN
70.0575	-41.4223	0.469551	0.413095	0.45457	0.332825	0.30717	0.46929	0.314452	0.416771	0.419659	0.518702	0.486389	0.33477	0.467402	0.419391	0.328105	NaN	NaN	NaN
70.0589	-41.4094	0.469552	0.404496	0.441198	0.343352	0.299314	0.47917	0.314153	0.364779	0.431743	0.501868	0.495117	0.334549	0.467212	0.421344	0.339069	NaN	NaN	NaN
70.0607	-41.3922	0.469553	0.391617	0.440445	0.331646	0.306197	0.462639	0.34249	0.338902	0.418132	0.453195	0.517533	0.341015	0.478017	0.423349	0.358291	NaN	NaN	NaN
70.0625	-41.375	0.469554	0.39162	0.440451	0.331651	0.309925	0.43599	0.370943	0.373242	0.372864	0.415804	0.545235	0.347842	0.500324	0.419624	0.369514	NaN	NaN	NaN
70.064	-41.362	0.463027	0.399997	0.440442	0.331644	0.309918	0.414546	0.399346	0.407628	0.334136	0.415566	0.56169	0.359247	0.500686	0.41981	0.369596	NaN	NaN	NaN
70.0659	-41.3448	0.453263	0.412576	0.440455	0.376373	0.303032	0.382809	0.427777	0.424897	0.347373	0.394854	0.576121	0.373046	0.490257	0.42832	0.361558	NaN	NaN	NaN
70.0679	-41.3274	0.453264	0.41258	0.466201	0.343531	0.310635	0.367238	0.44955	0.39944	0.353915	0.410839	0.581392	0.36884	0.482207	0.440766	0.352049	NaN	NaN	NaN
70.0693	-41.3144	0.453265	0.41258	0.472648	0.354895	0.303451	0.351228	0.485397	0.39967	0.34758	0.426826	0.574606	0.364374	0.484912	0.440753	0.349283	NaN	NaN	NaN
70.0712	-41.2969	0.453266	0.412585	0.472661	0.388576	0.292666	0.340588	0.499634	0.425591	0.354419	0.437889	0.560904	0.364411	0.484992	0.428464	0.350638	NaN	NaN	NaN
70.0731	-41.2794	0.453267	0.412588	0.498481	0.344407	0.292669	0.356581	0.492881	0.425861	0.341555	0.453849	0.554043	0.364427	0.485028	0.416145	0.350582	NaN	NaN	NaN
70.0745	-41.2662	0.453268	0.412598	0.504975	0.333362	0.292683	0.367288	0.500567	0.426302	0.328797	0.464685	0.547272	0.364499	0.485185	0.412162	0.350668	NaN	NaN	NaN
70.0764	-41.2487	0.453269	0.412595	0.504967	0.333357	0.292678	0.367277	0.500543	0.426281	0.354938	0.443794	0.547226	0.364472	0.476842	0.42439	0.343777	NaN	NaN	NaN
70.0784	-41.2311	0.45327	0.412588	0.504947	0.333346	0.292668	0.37259	0.493374	0.426236	0.354903	0.443733	0.547122	0.364413	0.471201	0.440706	0.336884	NaN	NaN	NaN
70.0798	-41.2179	0.453271	0.399696	0.523478	0.333338	0.29266	0.388608	0.471983	0.426206	0.354879	0.443693	0.547053	0.364374	0.471121	0.442687	0.336841	NaN	NaN	NaN
70.0817	-41.2002	0.453272	0.391124	0.535803	0.333332	0.292655	0.393945	0.464834	0.400254	0.374199	0.44366	0.539814	0.370964	0.471056	0.442621	0.336796	NaN	NaN	NaN
70.0836	-41.1825	0.453273	0.391123	0.522869	0.355441	0.292652	0.393938	0.464823	0.382992	0.387074	0.443645	0.527829	0.381982	0.471027	0.434351	0.342225	NaN	NaN	NaN
70.0851	-41.1692	0.453274	0.391124	0.503516	0.388559	0.292653	0.393939	0.464823	0.382992	0.387074	0.433014	0.520474	0.388507	0.47646	0.42612	0.347678	NaN	NaN	NaN
70.087	-41.1515	0.453276	0.391127	0.503525	0.388566	0.285198	0.398993	0.471961	0.348545	0.393207	0.432727	0.522611	0.386182	0.484648	0.422044	0.346303	NaN	NaN	NaN
70.0889	-41.1337	0.453277	0.391132	0.503541	0.388578	0.274035	0.393205	0.500465	0.339966	0.386585	0.443178	0.522676	0.386227	0.484736	0.413894	0.347688	NaN	NaN	NaN
70.0903	-41.1203	0.453278	0.391139	0.503561	0.388594	0.274044	0.393231	0.500514	0.339992	0.386622	0.443231	0.529931	0.379668	0.484852	0.411936	0.345001	NaN	NaN	NaN
70.0923	-41.1025	0.453279	0.391142	0.50357	0.377365	0.281369	0.388053	0.500533	0.340001	0.373552	0.437728	0.556002	0.362035	0.482134	0.414004	0.339523	NaN	NaN	NaN
70.0942	-41.0846	0.45328	0.386858	0.509738	0.332526	0.310656	0.367271	0.485956	0.357	0.353955	0.442712	0.57017	0.348699	0.465486	0.422017	0.336707	NaN	NaN	NaN
70.0956	-41.0712	0.453281	0.374034	0.528211	0.332525	0.310655	0.367268	0.464134	0.382485	0.353951	0.442705	0.560568	0.341785	0.459676	0.423825	0.340716	NaN	NaN	NaN
70.0976	-41.0533	0.453282	0.36977	0.534363	0.287796	0.317549	0.356322	0.470766	0.382139	0.373244	0.421494	0.541031	0.339047	0.45365	0.411106	0.358327	NaN	NaN	NaN
70.0995	-41.035	0.453283	0.369772	0.508594	0.287218	0.313255	0.360953	0.448389	0.389912	0.405281	0.416111	0.509832	0.340661	0.450342	0.388191	0.384155	NaN	NaN	NaN
70.101	-41.0216	0.453284	0.369774	0.482886	0.308907	0.301826	0.365565	0.440551	0.380741	0.424211	0.415824	0.490537	0.346909	0.444552	0.379784	0.393624	NaN	NaN	NaN
70.1029	-41.0036	0.453285	0.369778	0.444437	0.330175	0.293868	0.375319	0.411108	0.371235	0.475442	0.399878	0.473584	0.353142	0.433301	0.383597	0.394884	NaN	NaN	NaN
70.1048	-40.9856	0.453286	0.369782	0.41888	0.362833	0.278945	0.379884	0.40335	0.362134	0.513948	0.38934	0.46396	0.361841	0.425063	0.389647	0.38662	NaN	NaN	NaN
70.1063	-40.9722	0.453288	0.369777	0.406113	0.384665	0.271554	0.390151	0.388949	0.37893	0.513882	0.389297	0.461522	0.372933	0.416936	0.391631	0.381032	NaN	NaN	NaN
70.1082	-40.9542	0.453289	0.369769	0.406097	0.384645	0.275232	0.384973	0.410463	0.370711	0.500978	0.394517	0.473368	0.379879	0.406251	0.391648	0.378226	NaN	NaN	NaN
70.1101	-40.9362	0.45329	0.356974	0.450027	0.340916	0.293699	0.364487	0.453789	0.362946	0.462438	0.426171	0.476176	0.384628	0.392831	0.391629	0.378153	NaN	NaN	NaN
70.1116	-40.9227	0.453291	0.348467	0.481454	0.341427	0.2941	0.3649	0.468673	0.337828	0.449555	0.447297	0.478824	0.378076	0.387364	0.397656	0.378093	NaN	NaN	NaN
70.1135	-40.9047	0.453292	0.348466	0.500678	0.330808	0.305496	0.344377	0.497782	0.295609	0.449537	0.468497	0.474401	0.369181	0.392715	0.399667	0.376698	NaN	NaN	NaN
70.1154	-40.8866	0.453293	0.348467	0.507096	0.319845	0.309214	0.339209	0.490542	0.295519	0.455956	0.468507	0.464917	0.357802	0.414209	0.401699	0.376714	NaN	NaN	NaN
70.1169	-40.8731	0.453294	0.34847	0.513523	0.308878	0.30179	0.349558	0.454383	0.312117	0.475201	0.468531	0.455455	0.357637	0.416812	0.407786	0.376753	NaN	NaN	NaN
70.1188	-40.855	0.453295	0.348472	0.500702	0.375432	0.272662	0.370224	0.403922	0.362584	0.481629	0.457936	0.455313	0.366515	0.408737	0.411888	0.375432	NaN	NaN	NaN
70.1207	-40.8369	0.453296	0.348474	0.500708	0.386614	0.254283	0.39086	0.389544	0.387982	0.475236	0.442043	0.474043	0.366767	0.395308	0.420101	0.370011	NaN	NaN	NaN
70.1226	-40.8189	0.453297	0.348471	0.500695	0.386603	0.254278	0.39084	0.425512	0.388581	0.462766	0.426429	0.490613	0.364814	0.392745	0.411977	0.374085	NaN	NaN	NaN
70.1241	-40.8053	0.453298	0.348464	0.500671	0.386583	0.261661	0.396434	0.433135	0.38045	0.456541	0.415977	0.502395	0.364973	0.395553	0.405877	0.375382	NaN	NaN	NaN
70.126	-40.7873	0.453299	0.348458	0.50065	0.386566	0.276466	0.386392	0.455069	0.346737	0.450061	0.415919	0.509435	0.362805	0.409175	0.397781	0.379445	NaN	NaN	NaN
70.1279	-40.7693	0.453301	0.348456	0.500641	0.39773	0.287723	0.365703	0.462284	0.338269	0.450034	0.437066	0.495494	0.362685	0.419977	0.401872	0.380836	NaN	NaN	NaN
70.1293	-40.7559	0.453302	0.348456	0.500642	0.431303	0.276969	0.365702	0.462281	0.338267	0.45003	0.442362	0.481322	0.366929	0.428048	0.407997	0.380878	NaN	NaN	NaN
70.1312	-40.7381	0.453303	0.348457	0.500644	0.442517	0.27338	0.365703	0.462284	0.338268	0.443491	0.463472	0.467349	0.37351	0.428053	0.412093	0.382295	NaN	NaN	NaN
70.1331	-40.7203	0.453304	0.348459	0.500652	0.442524	0.258545	0.386388	0.462297	0.338276	0.417381	0.494904	0.465168	0.378059	0.420004	0.420311	0.376884	NaN	NaN	NaN
70.1345	-40.707	0.453305	0.348462	0.500663	0.442535	0.254845	0.391562	0.462318	0.338289	0.417402	0.494937	0.474698	0.373795	0.417391	0.418341	0.376933	NaN	NaN	NaN
70.1363	-40.6892	0.453306	0.348464	0.500671	0.442542	0.254848	0.391571	0.462333	0.32974	0.417298	0.500159	0.493743	0.356248	0.43383	0.406257	0.376965	NaN	NaN	NaN
70.1382	-40.6714	0.453307	0.348466	0.500676	0.442547	0.258553	0.386412	0.455101	0.304021	0.416832	0.515634	0.498426	0.347339	0.441936	0.400136	0.375555	NaN	NaN	NaN
70.1395	-40.6581	0.453308	0.348468	0.500686	0.431343	0.273273	0.370917	0.433431	0.329348	0.41685	0.49971	0.493427	0.347141	0.428089	0.410135	0.376893	NaN	NaN	NaN
70.1414	-40.6404	0.453309	0.348472	0.487872	0.408556	0.287613	0.370929	0.404584	0.363116	0.416873	0.478501	0.483598	0.34681	0.422349	0.409906	0.380913	NaN	NaN	NaN
70.1433	-40.6228	0.45331	0.348475	0.468687	0.441452	0.269079	0.396783	0.375797	0.362671	0.442505	0.457327	0.471419	0.350904	0.430314	0.39146	0.3904	NaN	NaN	NaN
70.1447	-40.6096	0.453311	0.348477	0.468692	0.441458	0.254277	0.401473	0.375416	0.379409	0.448913	0.441454	0.466426	0.352918	0.427435	0.391343	0.393093	NaN	NaN	NaN
70.1465	-40.592	0.453312	0.348478	0.468696	0.396773	0.250125	0.416598	0.389523	0.379412	0.442389	0.430771	0.468538	0.350594	0.427317	0.395351	0.391706	NaN	NaN	NaN
70.1483	-40.5744	0.453314	0.348479	0.468697	0.385627	0.253695	0.416598	0.389522	0.370865	0.422711	0.440912	0.473096	0.350593	0.427316	0.399435	0.383469	NaN	NaN	NaN
70.1497	-40.5613	0.453315	0.348479	0.468699	0.385628	0.261074	0.395682	0.425223	0.320027	0.441884	0.440912	0.480207	0.344032	0.427317	0.405568	0.378013	NaN	NaN	NaN
70.1515	-40.5438	0.443569	0.360964	0.468702	0.363339	0.279306	0.364324	0.46081	0.294683	0.448275	0.419786	0.494075	0.339658	0.427324	0.40353	0.371118	NaN	NaN	NaN
70.1534	-40.5261	0.43709	0.369289	0.468707	0.329982	0.301105	0.348869	0.460819	0.294687	0.42223	0.435207	0.482136	0.35056	0.424568	0.387155	0.376471	NaN	NaN	NaN
70.1547	-40.513	0.437091	0.36929	0.46871	0.329984	0.297404	0.354028	0.460824	0.269181	0.434882	0.440381	0.465569	0.356934	0.427142	0.37485	0.380454	NaN	NaN	NaN
70.1565	-40.4956	0.437092	0.369291	0.455925	0.351869	0.282611	0.374639	0.431989	0.285821	0.447647	0.440389	0.45139	0.354419	0.435045	0.364576	0.381682	NaN	NaN	NaN
70.1584	-40.4781	0.437093	0.369293	0.436786	0.384646	0.256787	0.394747	0.438738	0.302627	0.428134	0.455912	0.44904	0.343229	0.448459	0.3666	0.376196	NaN	NaN	NaN
70.1597	-40.4651	0.437094	0.369294	0.43679	0.384649	0.234726	0.414941	0.431234	0.327831	0.415146	0.466256	0.449049	0.338779	0.453849	0.368647	0.370726	NaN	NaN	NaN
70.1615	-40.4478	0.437095	0.352273	0.46127	0.340218	0.245287	0.420069	0.42405	0.336228	0.415148	0.466258	0.453777	0.338874	0.448478	0.36865	0.369355	NaN	NaN	NaN
70.1633	-40.4305	0.437096	0.348029	0.467377	0.329135	0.293012	0.358486	0.424048	0.336226	0.415145	0.466254	0.460868	0.339009	0.434943	0.368592	0.366564	NaN	NaN	NaN
70.1647	-40.4176	0.437097	0.348029	0.467377	0.329135	0.322621	0.317272	0.424044	0.336223	0.415141	0.460962	0.463139	0.339005	0.426747	0.368504	0.366503	NaN	NaN	NaN
70.1664	-40.4003	0.437098	0.348029	0.467378	0.329135	0.32262	0.317271	0.424041	0.336221	0.415137	0.439839	0.467501	0.338908	0.429381	0.360334	0.36778	NaN	NaN	NaN
70.1682	-40.383	0.424144	0.364655	0.448254	0.361862	0.29302	0.347896	0.438111	0.33622	0.415135	0.439837	0.450955	0.345264	0.429202	0.354129	0.371771	NaN	NaN	NaN
70.1696	-40.37	0.420874	0.368813	0.435534	0.350393	0.277875	0.368003	0.444818	0.353025	0.41514	0.439843	0.436805	0.351664	0.434536	0.345991	0.374439	NaN	NaN	NaN
70.1713	-40.3527	0.420875	0.368815	0.42282	0.350043	0.259249	0.403858	0.423287	0.378216	0.415145	0.43985	0.417966	0.360183	0.434368	0.343867	0.375731	NaN	NaN	NaN
70.1731	-40.3354	0.420876	0.368815	0.403786	0.38264	0.251919	0.414083	0.408942	0.386488	0.42152	0.439849	0.403854	0.368786	0.431549	0.343789	0.372925	NaN	NaN	NaN
70.1744	-40.3224	0.420877	0.368815	0.403785	0.382638	0.251918	0.414078	0.387459	0.386096	0.421136	0.455329	0.401494	0.37095	0.426081	0.347779	0.368786	NaN	NaN	NaN
70.1762	-40.305	0.420878	0.368813	0.384772	0.370983	0.266081	0.41407	0.38745	0.37758	0.414512	0.465632	0.406178	0.371039	0.417972	0.349761	0.368759	NaN	NaN	NaN
70.178	-40.2877	0.42088	0.368812	0.372124	0.381611	0.269613	0.41406	0.387439	0.377568	0.414496	0.465609	0.417916	0.366821	0.399027	0.363832	0.368781	NaN	NaN	NaN
70.1793	-40.2747	0.420881	0.368809	0.37212	0.381605	0.276941	0.403822	0.387424	0.377552	0.414474	0.449751	0.431761	0.366947	0.390962	0.369888	0.367418	NaN	NaN	NaN
70.1811	-40.2573	0.420882	0.368807	0.372116	0.381599	0.287954	0.388452	0.387409	0.377536	0.414453	0.439187	0.445692	0.362666	0.385575	0.377978	0.367447	NaN	NaN	NaN
70.1829	-40.2399	0.417506	0.372973	0.372115	0.381596	0.287953	0.388447	0.387403	0.377529	0.414444	0.439176	0.448036	0.360475	0.385559	0.384062	0.364738	NaN	NaN	NaN
70.1847	-40.2224	0.404056	0.389641	0.372115	0.337509	0.309435	0.378203	0.387397	0.377523	0.414436	0.439166	0.448024	0.356008	0.390894	0.388116	0.359271	NaN	NaN	NaN
70.186	-40.2093	0.404059	0.389641	0.372115	0.326513	0.324007	0.362819	0.387395	0.37752	0.414432	0.439161	0.440948	0.353628	0.401586	0.388108	0.355151	NaN	NaN	NaN
70.1878	-40.1918	0.404062	0.389642	0.372118	0.326516	0.324009	0.362822	0.387399	0.377525	0.414438	0.433901	0.433806	0.353436	0.412298	0.384051	0.353758	NaN	NaN	NaN
70.1896	-40.1743	0.404065	0.389643	0.37212	0.326517	0.32401	0.362824	0.3874	0.377526	0.414439	0.412867	0.431109	0.357636	0.412171	0.383968	0.350968	NaN	NaN	NaN
70.191	-40.1612	0.404067	0.389643	0.372121	0.326517	0.324011	0.362823	0.387399	0.377525	0.414438	0.412865	0.424056	0.359705	0.412081	0.381872	0.348174	NaN	NaN	NaN
70.1927	-40.1436	0.40407	0.389643	0.372121	0.326517	0.324009	0.36282	0.387395	0.37752	0.414432	0.412859	0.424048	0.359698	0.401206	0.379712	0.352181	NaN	NaN	NaN
70.1945	-40.1261	0.404073	0.372591	0.396509	0.326517	0.324009	0.36282	0.373093	0.394281	0.41443	0.412857	0.424045	0.359696	0.398489	0.373586	0.357584	NaN	NaN	NaN
70.1959	-40.1129	0.404076	0.36834	0.402595	0.326519	0.324011	0.362821	0.351683	0.419408	0.414431	0.402351	0.428577	0.359697	0.390354	0.373503	0.361643	NaN	NaN	NaN
70.1976	-40.0954	0.404078	0.368341	0.402596	0.326519	0.324011	0.362821	0.351683	0.419408	0.394992	0.402044	0.437715	0.357524	0.384932	0.377504	0.361643	NaN	NaN	NaN
70.1994	-40.0779	0.404081	0.368341	0.402597	0.32652	0.324011	0.36282	0.351682	0.419406	0.382053	0.412322	0.447122	0.348826	0.38493	0.377501	0.36164	NaN	NaN	NaN
70.2007	-40.0647	0.404084	0.368341	0.402598	0.32652	0.32401	0.362819	0.35168	0.402379	0.394759	0.412318	0.447116	0.348822	0.384923	0.377494	0.361632	NaN	NaN	NaN
70.2025	-40.0471	0.404087	0.368342	0.402599	0.326521	0.312966	0.378201	0.344547	0.38526	0.407336	0.417461	0.447117	0.355495	0.376919	0.377496	0.361634	NaN	NaN	NaN
70.2043	-40.0295	0.40409	0.368343	0.402602	0.326523	0.305617	0.388444	0.316068	0.41871	0.381484	0.417027	0.449113	0.366477	0.371587	0.377503	0.361642	NaN	NaN	NaN
70.2056	-40.0162	0.404092	0.368345	0.402607	0.326527	0.30562	0.388451	0.316074	0.418722	0.381494	0.411799	0.441986	0.370735	0.376945	0.373466	0.364373	NaN	NaN	NaN
70.2074	-39.9986	0.404095	0.368348	0.402613	0.326532	0.298276	0.398702	0.316081	0.418737	0.381507	0.411816	0.43261	0.368316	0.365942	0.379322	0.369778	NaN	NaN	NaN
70.2092	-39.9809	0.404098	0.36835	0.402618	0.326535	0.287275	0.41405	0.316086	0.418746	0.381516	0.411827	0.423235	0.363667	0.349514	0.39319	0.372448	NaN	NaN	NaN
70.2105	-39.9677	0.404101	0.36835	0.402619	0.326536	0.287275	0.398207	0.337079	0.418745	0.381514	0.411825	0.423233	0.359219	0.346738	0.395123	0.376522	NaN	NaN	NaN
70.2123	-39.95	0.404104	0.368349	0.402617	0.326533	0.287273	0.387657	0.351054	0.418733	0.381504	0.396091	0.434687	0.354864	0.36562	0.387193	0.382047	NaN	NaN	NaN
70.2141	-39.9323	0.404106	0.368349	0.402618	0.326534	0.287273	0.382385	0.343806	0.418452	0.394193	0.385625	0.450947	0.352896	0.384722	0.375341	0.383517	NaN	NaN	NaN
70.2154	-39.919	0.404109	0.368355	0.40263	0.326544	0.287282	0.366613	0.34345	0.418064	0.413252	0.385661	0.458059	0.348644	0.401101	0.371555	0.378205	NaN	NaN	NaN
70.2171	-39.9013	0.404112	0.36411	0.408738	0.326561	0.287296	0.361388	0.350463	0.418122	0.413314	0.385722	0.455802	0.348666	0.412047	0.369726	0.364647	NaN	NaN	NaN
70.2189	-39.8835	0.404115	0.347149	0.433058	0.326574	0.287307	0.361412	0.350489	0.418165	0.41336	0.385766	0.441758	0.348416	0.401002	0.377652	0.349539	NaN	NaN	NaN
70.2203	-39.8702	0.404118	0.34715	0.433061	0.326576	0.279976	0.355859	0.371437	0.418171	0.413366	0.385772	0.425324	0.345844	0.378976	0.389379	0.342519	NaN	NaN	NaN
70.222	-39.8525	0.40412	0.347151	0.433062	0.326576	0.268997	0.360657	0.385383	0.418168	0.413364	0.38577	0.404224	0.338725	0.351465	0.394754	0.343527	NaN	NaN	NaN
70.2238	-39.8347	0.404123	0.34715	0.43306	0.326575	0.26168	0.370845	0.385375	0.392695	0.432389	0.364837	0.399196	0.327343	0.359085	0.378231	0.3514	NaN	NaN	NaN
70.2251	-39.8213	0.404126	0.347148	0.426728	0.3374	0.250726	0.386104	0.385363	0.37574	0.445051	0.359599	0.39909	0.318434	0.385822	0.354065	0.358064	NaN	NaN	NaN
70.2269	-39.8036	0.404129	0.347147	0.401469	0.380639	0.247074	0.391184	0.385352	0.375728	0.445031	0.359585	0.39907	0.314002	0.415453	0.334103	0.363484	NaN	NaN	NaN
70.2287	-39.7858	0.404131	0.347145	0.401466	0.380635	0.232502	0.411502	0.371109	0.392398	0.445014	0.359572	0.403727	0.30967	0.423551	0.338202	0.35945	NaN	NaN	NaN
70.23	-39.7725	0.404134	0.347145	0.401466	0.380634	0.232501	0.411498	0.3498	0.391982	0.444601	0.374946	0.410738	0.303186	0.423538	0.344252	0.355394	NaN	NaN	NaN
70.2318	-39.7548	0.404137	0.347144	0.401465	0.380632	0.2325	0.411492	0.349794	0.375065	0.444317	0.385183	0.410725	0.309797	0.410119	0.350242	0.352659	NaN	NaN	NaN
70.2335	-39.737	0.40414	0.347143	0.401463	0.380628	0.232499	0.411484	0.349787	0.375056	0.444303	0.385171	0.401353	0.322842	0.388552	0.354083	0.352553	NaN	NaN	NaN
70.2348	-39.7237	0.404143	0.347142	0.401459	0.380624	0.232497	0.411474	0.328501	0.400013	0.444284	0.385155	0.391989	0.331463	0.375027	0.357945	0.356562	NaN	NaN	NaN
70.2365	-39.706	0.404145	0.34714	0.401455	0.380617	0.232494	0.41146	0.314334	0.382818	0.469568	0.385133	0.387296	0.335756	0.369599	0.355824	0.360555	NaN	NaN	NaN
70.2383	-39.6883	0.404148	0.347138	0.401451	0.380611	0.232491	0.411448	0.314325	0.374368	0.475865	0.385114	0.387274	0.333525	0.374916	0.355822	0.360537	NaN	NaN	NaN
70.2397	-39.6749	0.404151	0.347137	0.401449	0.380608	0.23249	0.41144	0.31432	0.374359	0.475849	0.369437	0.401016	0.320415	0.390947	0.357913	0.359227	NaN	NaN	NaN
70.2414	-39.6572	0.404154	0.347136	0.401447	0.380606	0.232489	0.411434	0.321389	0.366049	0.475835	0.359001	0.414849	0.31398	0.401778	0.362091	0.355249	NaN	NaN	NaN
70.2431	-39.6394	0.404157	0.347136	0.401447	0.380605	0.247056	0.39111	0.349737	0.332811	0.475826	0.358995	0.421856	0.320741	0.39934	0.358188	0.353928	NaN	NaN	NaN
70.2448	-39.6216	0.404159	0.347136	0.401448	0.380605	0.250705	0.386022	0.349737	0.324387	0.482149	0.358993	0.421854	0.325158	0.396725	0.356194	0.353926	NaN	NaN	NaN
70.2462	-39.6082	0.404162	0.347137	0.401451	0.380607	0.250706	0.386024	0.349738	0.299157	0.501117	0.358995	0.421857	0.320741	0.399342	0.35819	0.349832	NaN	NaN	NaN
70.2479	-39.5903	0.404165	0.347138	0.401453	0.38061	0.250707	0.386027	0.34974	0.290761	0.50744	0.358998	0.419522	0.30966	0.401775	0.360067	0.348395	NaN	NaN	NaN
70.2497	-39.5724	0.404168	0.347139	0.401455	0.380611	0.250708	0.386028	0.349742	0.290762	0.507443	0.358999	0.4055	0.307172	0.404151	0.359885	0.346914	NaN	NaN	NaN
70.251	-39.5589	0.404171	0.347139	0.401457	0.380613	0.243414	0.396202	0.349743	0.290763	0.507446	0.359001	0.393832	0.309137	0.403962	0.359764	0.346837	NaN	NaN	NaN
70.2527	-39.541	0.404173	0.34714	0.376263	0.423795	0.232492	0.41144	0.321393	0.323953	0.507451	0.359004	0.386842	0.304592	0.403729	0.359615	0.346744	NaN	NaN	NaN
70.2545	-39.523	0.404176	0.347141	0.36998	0.434574	0.225217	0.421598	0.293107	0.357132	0.507457	0.343377	0.39359	0.304595	0.392947	0.365553	0.346731	NaN	NaN	NaN
70.2559	-39.5094	0.404179	0.347141	0.36998	0.434573	0.214321	0.436803	0.278989	0.373705	0.494497	0.343193	0.398076	0.311194	0.384991	0.365543	0.34672	NaN	NaN	NaN
70.2576	-39.4914	0.404182	0.347141	0.36998	0.434572	0.214321	0.436799	0.278987	0.373701	0.475096	0.358515	0.398068	0.315593	0.379685	0.365532	0.346709	NaN	NaN	NaN
70.2593	-39.4733	0.404185	0.347141	0.36998	0.434571	0.203438	0.451997	0.278986	0.373698	0.475091	0.358512	0.398064	0.324407	0.369087	0.365526	0.346702	NaN	NaN	NaN
70.2606	-39.4598	0.404187	0.347141	0.369981	0.434571	0.196196	0.462113	0.2931	0.35712	0.475088	0.35851	0.39806	0.324404	0.371774	0.363534	0.346697	NaN	NaN	NaN
70.2624	-39.4417	0.40419	0.347142	0.369983	0.434573	0.196197	0.462113	0.314312	0.332236	0.475087	0.358509	0.39806	0.324404	0.382548	0.355583	0.346697	NaN	NaN	NaN
70.2642	-39.4237	0.404193	0.347143	0.369984	0.434575	0.196197	0.462115	0.314312	0.332237	0.47509	0.35851	0.398061	0.324405	0.382551	0.355586	0.3467	NaN	NaN	NaN
70.2655	-39.4101	0.404196	0.347144	0.369987	0.434578	0.20344	0.436239	0.335184	0.332239	0.455724	0.363426	0.402558	0.324409	0.382557	0.34954	0.346647	NaN	NaN	NaN
70.2672	-39.3921	0.404199	0.347144	0.369988	0.434578	0.214323	0.410558	0.349082	0.332238	0.442831	0.358027	0.406957	0.322151	0.385159	0.343458	0.346562	NaN	NaN	NaN
70.269	-39.3741	0.404201	0.347144	0.369988	0.434576	0.228854	0.390281	0.327845	0.357118	0.442823	0.358021	0.397627	0.324145	0.382315	0.341312	0.347808	NaN	NaN	NaN
70.2703	-39.3606	0.404204	0.347144	0.369989	0.434577	0.232494	0.385204	0.313716	0.365272	0.449129	0.358019	0.392966	0.326244	0.376882	0.341219	0.346379	NaN	NaN	NaN
70.272	-39.3426	0.404207	0.347144	0.36999	0.434579	0.225218	0.395354	0.313716	0.331655	0.474341	0.358019	0.385986	0.323886	0.376701	0.341098	0.343572	NaN	NaN	NaN
70.2738	-39.3247	0.40421	0.347145	0.369992	0.434581	0.207066	0.420686	0.299596	0.348218	0.455002	0.373326	0.385988	0.321685	0.37128	0.341008	0.34215	NaN	NaN	NaN
70.2751	-39.3112	0.404213	0.338678	0.382124	0.434582	0.196199	0.43586	0.278455	0.373041	0.442131	0.383522	0.385988	0.315083	0.371145	0.340917	0.346174	NaN	NaN	NaN
70.2768	-39.2932	0.404215	0.326012	0.400281	0.434583	0.196199	0.43586	0.278455	0.37304	0.442129	0.362722	0.394953	0.312882	0.36841	0.344877	0.346172	NaN	NaN	NaN
70.2785	-39.2752	0.404218	0.326013	0.400282	0.434583	0.207066	0.410201	0.292328	0.373038	0.442126	0.357528	0.39719	0.312879	0.368406	0.344872	0.346167	NaN	NaN	NaN
70.2798	-39.2618	0.404221	0.326013	0.400283	0.434582	0.214324	0.384377	0.313116	0.373036	0.442122	0.357525	0.397185	0.312876	0.3684	0.344867	0.34616	NaN	NaN	NaN
70.2815	-39.244	0.404224	0.326013	0.400284	0.434583	0.214324	0.384376	0.313115	0.373034	0.422828	0.372804	0.387878	0.321469	0.368396	0.344862	0.346156	NaN	NaN	NaN
70.2832	-39.2261	0.404227	0.326013	0.400284	0.423564	0.21785	0.384374	0.313113	0.356225	0.422564	0.382981	0.38555	0.323614	0.371077	0.342876	0.346149	NaN	NaN	NaN
70.2845	-39.2127	0.404229	0.326013	0.400284	0.39057	0.22841	0.384372	0.31311	0.331063	0.441408	0.382975	0.385543	0.328009	0.373846	0.336924	0.346138	NaN	NaN	NaN
70.2862	-39.1949	0.404232	0.326013	0.38143	0.411897	0.231924	0.384368	0.313107	0.331059	0.441401	0.367387	0.392252	0.334609	0.368594	0.334933	0.346125	NaN	NaN	NaN
70.2878	-39.1771	0.404235	0.326012	0.368889	0.433393	0.231923	0.373909	0.326962	0.331053	0.441391	0.357007	0.396716	0.334599	0.368579	0.334919	0.344746	NaN	NaN	NaN
70.2891	-39.1637	0.404238	0.326013	0.368892	0.433397	0.231924	0.358259	0.347731	0.331056	0.441396	0.357011	0.396721	0.332401	0.371231	0.334926	0.340671	NaN	NaN	NaN
70.2908	-39.1459	0.404241	0.326015	0.368896	0.433404	0.221041	0.37344	0.347739	0.331063	0.415737	0.377363	0.38744	0.329999	0.379088	0.330864	0.337888	NaN	NaN	NaN
70.2925	-39.1281	0.404243	0.309169	0.393063	0.389513	0.227848	0.383547	0.319548	0.36412	0.409339	0.382453	0.378165	0.325395	0.376137	0.338705	0.329682	NaN	NaN	NaN
70.2938	-39.1148	0.404246	0.30497	0.399094	0.378569	0.231355	0.383551	0.312516	0.347224	0.428178	0.38246	0.371215	0.316455	0.370452	0.348487	0.325536	NaN	NaN	NaN
70.2954	-39.0971	0.404249	0.304971	0.399097	0.378571	0.231356	0.383553	0.298448	0.346988	0.440726	0.372084	0.36642	0.307475	0.359363	0.362176	0.320007	NaN	NaN	NaN
70.2971	-39.0794	0.404252	0.30497	0.399096	0.378569	0.231355	0.367903	0.298105	0.371712	0.440715	0.356531	0.366161	0.302932	0.345747	0.369858	0.321223	NaN	NaN	NaN
70.2984	-39.0662	0.404255	0.304968	0.399091	0.378561	0.231352	0.35748	0.311894	0.371694	0.440688	0.356511	0.361511	0.30062	0.342908	0.371683	0.322477	NaN	NaN	NaN
70.3	-39.0487	0.404257	0.304966	0.399082	0.378551	0.231347	0.357463	0.311879	0.371669	0.440648	0.356481	0.361476	0.30059	0.340191	0.367559	0.322356	NaN	NaN	NaN
70.3017	-39.0311	0.40426	0.304962	0.399072	0.378538	0.220482	0.372579	0.31186	0.371639	0.434189	0.361525	0.361436	0.30493	0.334889	0.363466	0.32631	NaN	NaN	NaN
70.3033	-39.0135	0.404263	0.304961	0.39907	0.378534	0.213255	0.382645	0.311853	0.346524	0.427358	0.381806	0.363733	0.309347	0.334998	0.365554	0.32637	NaN	NaN	NaN
70.3046	-39.0002	0.404266	0.304961	0.399069	0.378532	0.213254	0.382641	0.311849	0.329818	0.439864	0.376617	0.372896	0.309493	0.337785	0.359652	0.325021	NaN	NaN	NaN
70.3063	-38.9826	0.404269	0.304961	0.39907	0.378533	0.213255	0.361838	0.339434	0.329817	0.439862	0.355924	0.391077	0.305315	0.34321	0.35577	0.322351	NaN	NaN	NaN
70.3079	-38.9652	0.404271	0.304962	0.386535	0.400014	0.213255	0.356649	0.346325	0.329819	0.439866	0.355927	0.395718	0.307609	0.34602	0.353903	0.318354	NaN	NaN	NaN
70.3091	-38.9521	0.404274	0.304963	0.367774	0.432182	0.213257	0.356653	0.346329	0.329824	0.439875	0.355933	0.395726	0.312002	0.340771	0.357934	0.315698	NaN	NaN	NaN
70.3108	-38.9347	0.404277	0.288187	0.391859	0.432184	0.213257	0.356654	0.346329	0.329824	0.439875	0.355933	0.386456	0.320569	0.340772	0.363966	0.310342	NaN	NaN	NaN
70.3124	-38.9173	0.40428	0.284005	0.397868	0.432185	0.213258	0.356654	0.346329	0.321475	0.446136	0.355933	0.384139	0.322708	0.340771	0.363965	0.304928	NaN	NaN	NaN
70.3136	-38.9044	0.404283	0.284005	0.397869	0.432186	0.213258	0.356654	0.346329	0.296467	0.464903	0.355931	0.384138	0.322707	0.340769	0.363963	0.304926	NaN	NaN	NaN
70.3152	-38.8871	0.404285	0.284006	0.397873	0.43219	0.213259	0.351464	0.353226	0.288148	0.464755	0.345505	0.390831	0.320518	0.343407	0.359953	0.307603	NaN	NaN	NaN
70.3168	-38.8699	0.404288	0.284007	0.397876	0.432194	0.21326	0.330732	0.380774	0.288151	0.439171	0.355436	0.395291	0.311752	0.361959	0.348009	0.311612	NaN	NaN	NaN
70.3181	-38.857	0.404291	0.284008	0.39788	0.432198	0.213262	0.330735	0.380779	0.288154	0.439178	0.355441	0.395298	0.311758	0.367325	0.344069	0.311623	NaN	NaN	NaN
70.3197	-38.8398	0.404294	0.284009	0.397885	0.432205	0.213264	0.330742	0.380788	0.28816	0.439194	0.355452	0.395314	0.311771	0.367347	0.342083	0.31027	NaN	NaN	NaN
70.3213	-38.8225	0.404297	0.284011	0.397891	0.432213	0.220492	0.320683	0.380798	0.288166	0.439209	0.355464	0.393012	0.30954	0.359242	0.343951	0.311564	NaN	NaN	NaN
70.3225	-38.8096	0.404299	0.284012	0.397895	0.39937	0.241869	0.305566	0.380804	0.279845	0.445471	0.355471	0.386075	0.309393	0.351093	0.353805	0.30885	NaN	NaN	NaN
70.324	-38.7924	0.404302	0.284013	0.372914	0.420339	0.248867	0.305568	0.380809	0.246615	0.444887	0.37572	0.383767	0.311536	0.327071	0.363548	0.307424	NaN	NaN	NaN
70.3256	-38.7752	0.404305	0.284014	0.366683	0.431025	0.248868	0.305568	0.380809	0.246615	0.438503	0.370443	0.381278	0.313568	0.318993	0.365377	0.307342	NaN	NaN	NaN
70.3269	-38.7623	0.404308	0.284013	0.36668	0.431018	0.238002	0.320682	0.380796	0.246608	0.438482	0.35495	0.383306	0.311255	0.326835	0.361326	0.305919	NaN	NaN	NaN
70.3284	-38.7451	0.404311	0.284012	0.366679	0.431014	0.230773	0.330742	0.380787	0.246604	0.438468	0.354939	0.376359	0.317651	0.326819	0.353277	0.311226	NaN	NaN	NaN
70.33	-38.7279	0.404314	0.284012	0.366678	0.409162	0.234152	0.330592	0.387667	0.246601	0.419321	0.37009	0.371731	0.31972	0.329429	0.353261	0.305803	NaN	NaN	NaN
70.3312	-38.715	0.404316	0.284012	0.366678	0.376464	0.233793	0.330147	0.408301	0.246598	0.406578	0.380181	0.364799	0.319549	0.337282	0.353246	0.304439	NaN	NaN	NaN
70.3328	-38.6979	0.404319	0.284012	0.366678	0.376463	0.226583	0.335019	0.41517	0.246597	0.406573	0.380175	0.360183	0.32162	0.3319	0.359149	0.304431	NaN	NaN	NaN
70.3344	-38.6808	0.404322	0.284012	0.366679	0.376463	0.212189	0.355073	0.415168	0.213444	0.431486	0.380172	0.360179	0.321617	0.32657	0.363084	0.301724	NaN	NaN	NaN
70.3356	-38.668	0.404325	0.284012	0.36668	0.376465	0.212189	0.355073	0.408126	0.213373	0.437709	0.380171	0.360178	0.321616	0.326569	0.363083	0.297673	NaN	NaN	NaN
70.3371	-38.6509	0.404328	0.284013	0.347994	0.40849	0.21219	0.355073	0.380013	0.246145	0.437706	0.380169	0.360176	0.315052	0.323775	0.370962	0.297669	NaN	NaN	NaN
70.3387	-38.6338	0.40433	0.284012	0.335564	0.429801	0.212189	0.355069	0.380008	0.246142	0.437697	0.35954	0.36905	0.310673	0.326338	0.372917	0.294958	NaN	NaN	NaN
70.3399	-38.6211	0.404333	0.284013	0.335565	0.4298	0.212189	0.355068	0.380005	0.246141	0.437693	0.35439	0.371265	0.31067	0.323673	0.374881	0.290906	NaN	NaN	NaN
70.3414	-38.604	0.404336	0.284013	0.335566	0.4298	0.212189	0.355067	0.380003	0.24614	0.412229	0.374561	0.371261	0.310667	0.313038	0.380748	0.29223	NaN	NaN	NaN
70.343	-38.587	0.404339	0.284014	0.335568	0.429804	0.21219	0.355069	0.380007	0.246142	0.405879	0.379605	0.371266	0.31067	0.313043	0.372725	0.297553	NaN	NaN	NaN
70.3442	-38.5741	0.404342	0.284014	0.33557	0.429806	0.212191	0.35507	0.380008	0.246142	0.405881	0.379607	0.364352	0.317065	0.313044	0.372728	0.297555	NaN	NaN	NaN
70.3458	-38.557	0.404344	0.284015	0.335572	0.429808	0.212191	0.355072	0.358961	0.237602	0.430753	0.379608	0.359747	0.31914	0.315661	0.372731	0.294858	NaN	NaN	NaN
70.3473	-38.5398	0.404347	0.271477	0.353583	0.429811	0.212192	0.355074	0.344958	0.245691	0.436969	0.379611	0.35975	0.310406	0.323465	0.374707	0.290817	NaN	NaN	NaN
70.3485	-38.527	0.40435	0.263143	0.365564	0.429812	0.212193	0.355074	0.344958	0.245691	0.436968	0.37961	0.35975	0.310406	0.315493	0.376599	0.293474	NaN	NaN	NaN
70.3501	-38.5098	0.404353	0.263143	0.365564	0.42981	0.212192	0.355071	0.344954	0.245688	0.436959	0.379602	0.357438	0.312527	0.312829	0.372532	0.296098	NaN	NaN	NaN
70.3517	-38.4924	0.404356	0.263143	0.365564	0.429808	0.212192	0.355067	0.34495	0.245686	0.411531	0.399756	0.348229	0.321032	0.31282	0.372518	0.290695	NaN	NaN	NaN
70.3528	-38.4794	0.404358	0.263143	0.346931	0.461762	0.212191	0.355064	0.344946	0.245683	0.40518	0.404785	0.348222	0.321025	0.312811	0.368493	0.291992	NaN	NaN	NaN
70.3544	-38.4621	0.404361	0.263143	0.334538	0.483028	0.212191	0.355063	0.344944	0.245682	0.405177	0.384172	0.357085	0.316654	0.318033	0.362475	0.290579	NaN	NaN	NaN
70.356	-38.4448	0.404364	0.263143	0.334539	0.483027	0.212191	0.355061	0.344942	0.212651	0.429995	0.379023	0.359295	0.310104	0.325863	0.360463	0.289205	NaN	NaN	NaN
70.3575	-38.4274	0.404367	0.263143	0.33454	0.483027	0.212191	0.35506	0.34494	0.20441	0.42984	0.384054	0.359292	0.310101	0.325859	0.35245	0.290466	NaN	NaN	NaN
70.3587	-38.4144	0.40437	0.263143	0.33454	0.483023	0.201411	0.370082	0.344936	0.204408	0.410805	0.399137	0.352385	0.316471	0.325847	0.352434	0.28776	NaN	NaN	NaN
70.3603	-38.3969	0.404373	0.263143	0.33454	0.483022	0.194238	0.380081	0.337932	0.212574	0.404467	0.404159	0.347786	0.320716	0.32584	0.350424	0.285041	NaN	NaN	NaN
70.3619	-38.3795	0.404375	0.263144	0.334541	0.461218	0.20121	0.364572	0.330546	0.245219	0.404466	0.404157	0.347785	0.31199	0.325661	0.350278	0.290341	NaN	NaN	NaN
70.363	-38.3663	0.414349	0.250869	0.334543	0.428591	0.211648	0.354252	0.344239	0.245218	0.404466	0.404157	0.347784	0.30981	0.325615	0.35224	0.29034	NaN	NaN	NaN
70.3646	-38.3487	0.421023	0.234383	0.346517	0.428593	0.211649	0.354253	0.344239	0.245219	0.404466	0.404157	0.347784	0.30981	0.325616	0.352241	0.290341	NaN	NaN	NaN
70.3662	-38.331	0.421024	0.221964	0.364437	0.428596	0.211649	0.354255	0.344241	0.24522	0.40447	0.404161	0.347787	0.309813	0.32562	0.352247	0.290346	NaN	NaN	NaN
70.3674	-38.3178	0.421025	0.221965	0.36444	0.428599	0.21165	0.354257	0.344244	0.245221	0.404473	0.404164	0.34779	0.309816	0.325624	0.350253	0.291676	NaN	NaN	NaN
70.369	-38.3	0.421027	0.221966	0.364442	0.428601	0.200898	0.369249	0.344245	0.245222	0.404475	0.404167	0.347792	0.303282	0.333458	0.342262	0.296982	NaN	NaN	NaN
70.3706	-38.2823	0.421028	0.221966	0.364444	0.428603	0.193743	0.379227	0.344246	0.245222	0.404477	0.404168	0.347793	0.298929	0.33868	0.342264	0.296985	NaN	NaN	NaN
70.3718	-38.2689	0.421029	0.221967	0.364446	0.428606	0.193744	0.379229	0.344247	0.245223	0.404478	0.40417	0.347794	0.29893	0.330713	0.348154	0.296987	NaN	NaN	NaN
70.3733	-38.2511	0.42103	0.221967	0.364448	0.428608	0.193744	0.37923	0.337261	0.253387	0.40448	0.383592	0.356649	0.298931	0.325407	0.352081	0.294295	NaN	NaN	NaN
70.3749	-38.2333	0.421031	0.221968	0.36445	0.42861	0.193745	0.379232	0.309366	0.286013	0.404481	0.378456	0.358862	0.298932	0.325409	0.352084	0.290258	NaN	NaN	NaN
70.3761	-38.2199	0.421033	0.221969	0.364453	0.428614	0.193746	0.379236	0.309369	0.286016	0.404488	0.378462	0.354273	0.303185	0.325417	0.350095	0.291592	NaN	NaN	NaN
70.3777	-38.202	0.421034	0.221969	0.364457	0.428619	0.193747	0.379241	0.309373	0.286019	0.404496	0.37847	0.347395	0.300851	0.335862	0.342116	0.296905	NaN	NaN	NaN
70.3793	-38.1842	0.421035	0.22197	0.364461	0.406893	0.200702	0.379246	0.309378	0.286023	0.404504	0.378478	0.347402	0.298683	0.338481	0.34213	0.29557	NaN	NaN	NaN
70.3806	-38.1708	0.421036	0.221971	0.364465	0.374378	0.207534	0.384243	0.309382	0.286027	0.404513	0.378486	0.34741	0.298691	0.338494	0.342145	0.291544	NaN	NaN	NaN
70.3821	-38.153	0.421037	0.221972	0.364469	0.374383	0.193249	0.404181	0.309387	0.286032	0.404522	0.378495	0.345123	0.300821	0.338507	0.334172	0.295511	NaN	NaN	NaN
70.3837	-38.1351	0.421039	0.221973	0.364472	0.374387	0.19325	0.404187	0.281549	0.318657	0.404531	0.378503	0.335959	0.309312	0.330551	0.338072	0.296849	NaN	NaN	NaN
70.3849	-38.1217	0.42104	0.221974	0.364476	0.374391	0.193252	0.404193	0.274606	0.32681	0.404539	0.378511	0.335966	0.30932	0.325256	0.342007	0.296861	NaN	NaN	NaN
70.3865	-38.1038	0.421041	0.221975	0.364479	0.374395	0.193253	0.404198	0.274609	0.326814	0.404546	0.378518	0.335971	0.307148	0.327872	0.336027	0.298152	NaN	NaN	NaN
70.3881	-38.0859	0.421042	0.221975	0.36448	0.374394	0.193253	0.404196	0.274607	0.318536	0.410741	0.378513	0.335967	0.298444	0.330333	0.337909	0.296755	NaN	NaN	NaN
70.3893	-38.0725	0.421044	0.221975	0.36448	0.374394	0.193252	0.404193	0.274605	0.293747	0.429319	0.378507	0.335961	0.298438	0.325021	0.341818	0.296746	NaN	NaN	NaN
70.3908	-38.0546	0.421045	0.221975	0.364479	0.374391	0.193252	0.404186	0.274601	0.285494	0.435497	0.373357	0.338163	0.298428	0.317057	0.347678	0.296729	NaN	NaN	NaN
70.3924	-38.0367	0.421046	0.221975	0.364477	0.374387	0.193251	0.404177	0.274596	0.285487	0.43548	0.35282	0.346986	0.298415	0.311744	0.351571	0.296707	NaN	NaN	NaN
70.3936	-38.0232	0.421047	0.221975	0.364477	0.374386	0.19325	0.404172	0.274593	0.285483	0.43547	0.352813	0.346978	0.298407	0.311734	0.345567	0.300668	NaN	NaN	NaN
70.3952	-38.0054	0.421048	0.221975	0.364477	0.374385	0.19325	0.393842	0.288263	0.285481	0.435466	0.352809	0.346974	0.298403	0.311729	0.34157	0.30331	NaN	NaN	NaN
70.3967	-37.9875	0.42105	0.221975	0.364479	0.374387	0.193251	0.37838	0.308746	0.285482	0.435466	0.352809	0.346974	0.298403	0.31173	0.341571	0.303311	NaN	NaN	NaN
70.3979	-37.974	0.421051	0.221976	0.36448	0.374388	0.193251	0.37838	0.308746	0.285481	0.416454	0.367869	0.346973	0.298402	0.311728	0.341569	0.303309	NaN	NaN	NaN
70.3994	-37.9561	0.421052	0.221976	0.364482	0.374389	0.193251	0.378381	0.308746	0.285481	0.403803	0.377902	0.346973	0.294056	0.316933	0.34157	0.30331	NaN	NaN	NaN
70.401	-37.9382	0.421053	0.221977	0.364484	0.37439	0.193252	0.378381	0.308746	0.285481	0.403803	0.377901	0.346972	0.287541	0.324739	0.341569	0.303309	NaN	NaN	NaN
70.4022	-37.9247	0.421055	0.221977	0.364486	0.374392	0.193252	0.378382	0.308747	0.285482	0.403804	0.377902	0.346972	0.287542	0.324739	0.34157	0.30331	NaN	NaN	NaN
70.4038	-37.9068	0.421056	0.221978	0.364488	0.374394	0.193253	0.378384	0.3157	0.277346	0.403805	0.377903	0.346974	0.287542	0.324741	0.341572	0.300619	NaN	NaN	NaN
70.4053	-37.8888	0.421057	0.221978	0.36449	0.374396	0.193254	0.378386	0.343568	0.236533	0.409996	0.377906	0.346977	0.287545	0.324745	0.339583	0.29791	NaN	NaN	NaN
70.4065	-37.8753	0.421058	0.221979	0.364493	0.374399	0.189685	0.383367	0.34357	0.211861	0.428547	0.377909	0.346979	0.287547	0.319452	0.337522	0.301886	NaN	NaN	NaN
70.4081	-37.8573	0.421059	0.221979	0.364495	0.374401	0.175437	0.403253	0.343573	0.203651	0.43473	0.377914	0.346983	0.287551	0.31152	0.341405	0.303216	NaN	NaN	NaN
70.4096	-37.8393	0.421061	0.22198	0.364498	0.374405	0.175438	0.403257	0.343576	0.203652	0.434737	0.377919	0.356162	0.27908	0.311526	0.341414	0.303225	NaN	NaN	NaN
70.4112	-37.8212	0.421062	0.221981	0.364501	0.374407	0.175439	0.40326	0.343578	0.203653	0.434741	0.362536	0.365089	0.276963	0.31153	0.34142	0.30323	NaN	NaN	NaN
70.4109	-37.8177	0.421063	0.221981	0.364503	0.374409	0.175439	0.403261	0.343579	0.203653	0.434742	0.352296	0.369503	0.276963	0.311531	0.34142	0.303231	NaN	NaN	NaN
70.4124	-37.8003	0.421064	0.221982	0.364505	0.374411	0.17544	0.403264	0.343581	0.203654	0.434745	0.352298	0.374098	0.272726	0.311533	0.341424	0.301888	NaN	NaN	NaN
70.4139	-37.7828	0.421066	0.221982	0.364507	0.374412	0.175441	0.403265	0.343581	0.203654	0.434745	0.352298	0.380995	0.266364	0.306244	0.341351	0.299152	NaN	NaN	NaN
70.4151	-37.7697	0.421067	0.221983	0.364509	0.374414	0.175441	0.403266	0.343582	0.203654	0.434746	0.352298	0.380996	0.266364	0.298318	0.341239	0.303122	NaN	NaN	NaN
70.4166	-37.7522	0.421068	0.221983	0.36451	0.374415	0.175442	0.403267	0.343582	0.203654	0.434747	0.352299	0.380996	0.266364	0.298318	0.34124	0.303123	NaN	NaN	NaN
70.4181	-37.7346	0.421069	0.221984	0.364512	0.374416	0.175442	0.403267	0.343582	0.203654	0.434745	0.352297	0.380994	0.266363	0.298316	0.341237	0.303121	NaN	NaN	NaN
70.4193	-37.7214	0.42107	0.221984	0.364513	0.374417	0.175442	0.403266	0.343581	0.203653	0.434743	0.352295	0.380991	0.266361	0.298314	0.341234	0.303117	NaN	NaN	NaN
70.4208	-37.7038	0.421072	0.221984	0.364514	0.374416	0.175442	0.403264	0.343579	0.203652	0.434738	0.352291	0.380986	0.266358	0.298309	0.341226	0.303111	NaN	NaN	NaN
70.4223	-37.6862	0.421073	0.221985	0.364515	0.374418	0.175442	0.403264	0.343579	0.203652	0.434738	0.352291	0.380986	0.266357	0.298308	0.341226	0.30311	NaN	NaN	NaN
70.4234	-37.673	0.421074	0.221985	0.364517	0.374419	0.175443	0.403266	0.34358	0.203653	0.434739	0.352292	0.37409	0.272719	0.298309	0.341228	0.303113	NaN	NaN	NaN
70.4249	-37.6553	0.421075	0.221986	0.36452	0.374422	0.175444	0.403269	0.343582	0.203653	0.434744	0.352295	0.369501	0.27696	0.298313	0.341234	0.303118	NaN	NaN	NaN
70.4265	-37.6376	0.421077	0.221986	0.36452	0.374421	0.175443	0.403264	0.343578	0.203652	0.434735	0.352289	0.369493	0.276955	0.298305	0.341222	0.303107	NaN	NaN	NaN
70.4276	-37.6243	0.421078	0.221986	0.364518	0.374417	0.175443	0.403257	0.343571	0.203649	0.43472	0.352278	0.369479	0.276944	0.298291	0.3412	0.303087	NaN	NaN	NaN
70.4291	-37.6065	0.421079	0.221985	0.364517	0.374414	0.175442	0.403249	0.343564	0.203646	0.434706	0.352266	0.369465	0.276934	0.298276	0.349153	0.297776	NaN	NaN	NaN
70.4306	-37.5887	0.42108	0.221985	0.364515	0.374411	0.175441	0.403241	0.343556	0.203643	0.434691	0.352255	0.369451	0.276924	0.298262	0.351125	0.296434	NaN	NaN	NaN
70.4318	-37.5753	0.421081	0.221985	0.364516	0.374411	0.175441	0.40324	0.343555	0.203642	0.434687	0.352253	0.369447	0.276921	0.298258	0.351119	0.296429	NaN	NaN	NaN
70.4333	-37.5575	0.421083	0.221986	0.364517	0.374412	0.175442	0.403239	0.343554	0.203642	0.434686	0.352251	0.369446	0.27692	0.298257	0.351117	0.296427	NaN	NaN	NaN
70.4348	-37.5397	0.421084	0.221986	0.364519	0.374414	0.175442	0.403241	0.343555	0.203642	0.428357	0.357266	0.369447	0.276921	0.300898	0.349164	0.296429	NaN	NaN	NaN
70.4359	-37.5263	0.421085	0.221987	0.364521	0.374415	0.175443	0.403241	0.343555	0.203642	0.409392	0.372294	0.369445	0.27692	0.308823	0.343293	0.296427	NaN	NaN	NaN
70.4374	-37.5084	0.421086	0.221987	0.364522	0.374415	0.175443	0.403239	0.343553	0.203641	0.403076	0.377298	0.369442	0.276917	0.311463	0.341332	0.296423	NaN	NaN	NaN
70.4389	-37.4906	0.421088	0.221987	0.364523	0.374416	0.175443	0.40324	0.343553	0.203641	0.403076	0.377297	0.369441	0.276916	0.311463	0.341331	0.296422	NaN	NaN	NaN
70.4401	-37.4772	0.421089	0.221988	0.364525	0.374417	0.175443	0.40324	0.343553	0.203641	0.403075	0.377297	0.36944	0.276915	0.311462	0.34133	0.296421	NaN	NaN	NaN
70.4416	-37.4593	0.42109	0.221988	0.364527	0.374419	0.175444	0.403242	0.343555	0.203642	0.403078	0.377299	0.37863	0.26844	0.316754	0.337423	0.296425	NaN	NaN	NaN
70.4435	-37.4442	0.421091	0.221989	0.364529	0.374421	0.175445	0.403245	0.343557	0.203642	0.40308	0.377301	0.380931	0.257652	0.335106	0.331558	0.296429	NaN	NaN	NaN
70.4445	-37.4313	0.421092	0.22199	0.364532	0.374424	0.175445	0.403248	0.329616	0.219914	0.403084	0.377304	0.37404	0.261846	0.337712	0.331563	0.296434	NaN	NaN	NaN
70.446	-37.4141	0.421094	0.22199	0.364532	0.374424	0.175445	0.403245	0.308741	0.244299	0.40308	0.3773	0.369443	0.266078	0.340356	0.329601	0.296428	NaN	NaN	NaN
70.4474	-37.397	0.421095	0.22199	0.364533	0.374424	0.175446	0.403243	0.308739	0.244297	0.403076	0.377296	0.369439	0.266075	0.35096	0.321771	0.296421	NaN	NaN	NaN
70.4485	-37.3842	0.421096	0.221991	0.364535	0.374426	0.175446	0.403246	0.30874	0.244298	0.403078	0.377298	0.369441	0.266076	0.350963	0.321774	0.296425	NaN	NaN	NaN
70.4499	-37.3671	0.421097	0.221991	0.364537	0.374427	0.175447	0.403246	0.308741	0.244298	0.403078	0.377298	0.360262	0.274546	0.350963	0.321774	0.296424	NaN	NaN	NaN
70.4514	-37.35	0.421099	0.221992	0.364539	0.374428	0.175447	0.403247	0.308741	0.244298	0.403078	0.377298	0.35797	0.276662	0.350963	0.325756	0.29378	NaN	NaN	NaN
70.4525	-37.3371	0.4211	0.221992	0.364541	0.374431	0.175448	0.403249	0.308742	0.244299	0.403081	0.3773	0.357972	0.276664	0.350967	0.331736	0.289816	NaN	NaN	NaN
70.4539	-37.3199	0.421101	0.221993	0.364544	0.374433	0.175448	0.403253	0.308745	0.244301	0.403085	0.377305	0.357976	0.276667	0.350973	0.337723	0.285854	NaN	NaN	NaN
70.4553	-37.3027	0.421102	0.221993	0.364546	0.374436	0.175449	0.403255	0.308746	0.244302	0.403088	0.377307	0.364858	0.270318	0.350976	0.341717	0.283212	NaN	NaN	NaN
70.4564	-37.2898	0.421104	0.221994	0.36455	0.37444	0.17545	0.403261	0.301796	0.252437	0.403096	0.377315	0.369458	0.268253	0.348385	0.345722	0.280578	NaN	NaN	NaN
70.4579	-37.2725	0.421105	0.221995	0.364553	0.374444	0.175451	0.403268	0.274037	0.284941	0.403105	0.377324	0.378656	0.268455	0.337979	0.35173	0.279308	NaN	NaN	NaN
70.4593	-37.2551	0.421106	0.221997	0.364562	0.374456	0.175454	0.403288	0.274048	0.284955	0.403135	0.377352	0.380989	0.266355	0.343328	0.347861	0.283381	NaN	NaN	NaN
70.4607	-37.2377	0.421107	0.221999	0.36457	0.374466	0.175457	0.403306	0.274058	0.284966	0.40316	0.377377	0.381018	0.266373	0.351335	0.336028	0.287388	NaN	NaN	NaN
70.4618	-37.2246	0.421109	0.222001	0.36458	0.374478	0.17546	0.403327	0.274069	0.28498	0.403191	0.377407	0.374153	0.26625	0.359208	0.332085	0.29008	NaN	NaN	NaN
70.4633	-37.2071	0.42111	0.222003	0.364588	0.374489	0.175463	0.403346	0.27408	0.284993	0.403218	0.377434	0.364992	0.268242	0.361756	0.328066	0.291378	NaN	NaN	NaN
70.4648	-37.1895	0.421111	0.222003	0.364589	0.374489	0.175463	0.403344	0.274078	0.284991	0.403214	0.377429	0.353514	0.270159	0.364201	0.323965	0.292608	NaN	NaN	NaN
70.4659	-37.1763	0.421112	0.222003	0.364588	0.374487	0.175463	0.403338	0.274075	0.284987	0.403205	0.377421	0.34663	0.270001	0.364029	0.321855	0.292507	NaN	NaN	NaN
70.4673	-37.1586	0.421113	0.222003	0.364585	0.374482	0.175462	0.403327	0.274069	0.284979	0.403188	0.377403	0.346613	0.265659	0.363894	0.321759	0.289747	NaN	NaN	NaN
70.4688	-37.1408	0.421115	0.222002	0.364582	0.374476	0.17546	0.403314	0.274061	0.284969	0.403166	0.377382	0.351174	0.261416	0.363859	0.321727	0.289716	NaN	NaN	NaN
70.4699	-37.1275	0.421116	0.222001	0.364578	0.374469	0.175459	0.4033	0.274053	0.284959	0.403144	0.37736	0.35803	0.255054	0.363823	0.321694	0.289685	NaN	NaN	NaN
70.4713	-37.1097	0.421117	0.222001	0.364576	0.374466	0.175458	0.403291	0.274048	0.284953	0.40313	0.3671	0.362429	0.261533	0.355992	0.321673	0.289664	NaN	NaN	NaN
70.4728	-37.092	0.421118	0.222001	0.364576	0.374465	0.175458	0.39298	0.287689	0.28495	0.403124	0.35175	0.36674	0.267975	0.350775	0.321663	0.289656	NaN	NaN	NaN
70.4739	-37.0786	0.42112	0.222001	0.364578	0.374466	0.175458	0.377548	0.308131	0.28495	0.403122	0.351748	0.359861	0.274321	0.350773	0.321661	0.289654	NaN	NaN	NaN
70.4753	-37.0609	0.421121	0.222003	0.364583	0.374472	0.17546	0.377557	0.308138	0.284956	0.403137	0.35176	0.357585	0.276446	0.350794	0.315712	0.29364	NaN	NaN	NaN
70.4768	-37.0431	0.421122	0.222004	0.364588	0.374479	0.175461	0.377567	0.308145	0.284964	0.396837	0.356781	0.357601	0.26996	0.35863	0.311757	0.294963	NaN	NaN	NaN
70.4779	-37.0298	0.421123	0.222005	0.364594	0.374485	0.175463	0.377577	0.308153	0.28497	0.377929	0.371806	0.357615	0.265643	0.36386	0.311777	0.290951	NaN	NaN	NaN
70.4793	-37.012	0.421125	0.222006	0.3646	0.374493	0.175465	0.377587	0.308161	0.284978	0.371645	0.376823	0.357632	0.265654	0.363887	0.311801	0.28963	NaN	NaN	NaN
70.4808	-36.9943	0.421126	0.222008	0.358404	0.385127	0.175467	0.377599	0.30817	0.284987	0.371662	0.376842	0.357651	0.265667	0.353293	0.319649	0.286968	NaN	NaN	NaN
70.4818	-36.981	0.421127	0.22201	0.339842	0.416974	0.17547	0.377615	0.308183	0.284999	0.371685	0.376869	0.357678	0.263522	0.35063	0.321609	0.284296	NaN	NaN	NaN
70.4833	-36.9633	0.421128	0.222013	0.333674	0.427594	0.175475	0.377644	0.315148	0.276896	0.371725	0.376915	0.357725	0.254902	0.350496	0.321536	0.289651	NaN	NaN	NaN
70.4848	-36.9456	0.417819	0.226095	0.333685	0.427617	0.175479	0.377672	0.343003	0.244382	0.371765	0.37696	0.355478	0.257047	0.350566	0.321605	0.289717	NaN	NaN	NaN
70.4858	-36.9322	0.40792	0.238336	0.333693	0.427632	0.175482	0.377688	0.34302	0.244391	0.371788	0.376987	0.348629	0.25692	0.358419	0.315669	0.291034	NaN	NaN	NaN
70.4872	-36.9145	0.404633	0.242417	0.333698	0.427641	0.175484	0.357139	0.370322	0.244397	0.371803	0.377003	0.346354	0.254721	0.363653	0.311712	0.289666	NaN	NaN	NaN
70.4887	-36.8968	0.404635	0.242418	0.333702	0.427648	0.175486	0.352016	0.377146	0.244401	0.371813	0.377015	0.346365	0.25689	0.366385	0.307817	0.289683	NaN	NaN	NaN
70.4898	-36.8836	0.404638	0.242417	0.333699	0.42764	0.175484	0.352006	0.377132	0.244394	0.371795	0.376995	0.353219	0.259183	0.363908	0.30789	0.285685	NaN	NaN	NaN
70.4912	-36.8659	0.404641	0.242417	0.333698	0.427635	0.175483	0.352	0.377123	0.24439	0.378088	0.371976	0.364676	0.263748	0.353616	0.315941	0.276409	NaN	NaN	NaN
70.4927	-36.8483	0.404644	0.242417	0.333699	0.427636	0.175484	0.352	0.377122	0.244389	0.403347	0.351937	0.373861	0.266109	0.345894	0.325979	0.273867	NaN	NaN	NaN
70.4937	-36.835	0.404647	0.234126	0.345655	0.427661	0.175489	0.352026	0.377158	0.244406	0.403397	0.35198	0.380816	0.26629	0.343455	0.33012	0.27536	NaN	NaN	NaN
70.4951	-36.8174	0.40465	0.221721	0.36354	0.427676	0.175492	0.352042	0.377179	0.244416	0.403427	0.352005	0.38085	0.266311	0.351482	0.332273	0.276828	NaN	NaN	NaN
70.4965	-36.7997	0.404652	0.221722	0.363544	0.427682	0.175493	0.352048	0.377187	0.244419	0.403437	0.352014	0.373959	0.272683	0.351497	0.32829	0.283535	NaN	NaN	NaN
70.4976	-36.7864	0.404655	0.221722	0.363545	0.427682	0.175493	0.352046	0.377185	0.219748	0.421985	0.35201	0.369358	0.270408	0.359328	0.322291	0.284812	NaN	NaN	NaN
70.499	-36.7687	0.404658	0.221721	0.363542	0.427675	0.175492	0.352037	0.377171	0.203333	0.43432	0.351994	0.369337	0.263888	0.356479	0.324119	0.287415	NaN	NaN	NaN
70.5005	-36.751	0.404661	0.221717	0.363524	0.427639	0.175485	0.351996	0.377114	0.203314	0.415253	0.366953	0.36925	0.255169	0.361462	0.317945	0.288537	NaN	NaN	NaN
70.5016	-36.7377	0.404664	0.221715	0.363512	0.427614	0.17548	0.351968	0.377075	0.203301	0.402572	0.37691	0.364598	0.255037	0.35861	0.315767	0.292405	NaN	NaN	NaN
70.503	-36.7199	0.404667	0.221713	0.363501	0.427592	0.175476	0.351943	0.377039	0.203289	0.383611	0.391871	0.350792	0.261203	0.355716	0.315555	0.29493	NaN	NaN	NaN
70.5044	-36.7021	0.40467	0.20933	0.381346	0.427581	0.175474	0.351929	0.377019	0.203283	0.371004	0.401839	0.337038	0.265208	0.355462	0.315375	0.296141	NaN	NaN	NaN
70.5054	-36.6888	0.404672	0.2011	0.393217	0.427575	0.175473	0.351922	0.377009	0.20328	0.352137	0.41682	0.327887	0.271477	0.350086	0.317234	0.298762	NaN	NaN	NaN
70.5069	-36.6711	0.404675	0.2011	0.393216	0.427573	0.175473	0.351918	0.377004	0.186888	0.351889	0.426799	0.323315	0.269206	0.355215	0.313213	0.302713	NaN	NaN	NaN
70.5083	-36.6534	0.404678	0.2011	0.393217	0.427573	0.175473	0.351916	0.363067	0.178576	0.370324	0.426793	0.332443	0.256453	0.349805	0.319023	0.304028	NaN	NaN	NaN
70.5097	-36.6358	0.404681	0.2011	0.393218	0.427573	0.175473	0.351916	0.342208	0.202887	0.370323	0.426791	0.334726	0.252186	0.352398	0.311078	0.309311	NaN	NaN	NaN
70.5107	-36.6226	0.404684	0.201101	0.39322	0.427575	0.175473	0.351917	0.342209	0.202887	0.370324	0.426792	0.334726	0.245719	0.360184	0.311079	0.305275	NaN	NaN	NaN
70.5121	-36.6051	0.404687	0.201101	0.393223	0.427577	0.175474	0.351919	0.34221	0.202888	0.370325	0.426794	0.334728	0.243565	0.362781	0.311081	0.302588	NaN	NaN	NaN
70.5135	-36.5876	0.404689	0.201102	0.393225	0.427579	0.175475	0.35192	0.342211	0.202888	0.370326	0.426795	0.334728	0.243565	0.365431	0.309132	0.302589	NaN	NaN	NaN
70.5145	-36.5745	0.404692	0.201102	0.393227	0.427582	0.175475	0.351921	0.342212	0.202888	0.370327	0.426797	0.334729	0.243566	0.373389	0.299318	0.305233	NaN	NaN	NaN
70.5159	-36.557	0.404695	0.201103	0.39323	0.427584	0.175476	0.351923	0.342214	0.202889	0.37033	0.4268	0.334731	0.243567	0.376047	0.291426	0.305163	NaN	NaN	NaN
70.5172	-36.5394	0.404698	0.201103	0.393233	0.427588	0.175476	0.351925	0.314452	0.235302	0.370333	0.426805	0.334734	0.243569	0.376053	0.291431	0.30248	NaN	NaN	NaN
70.5183	-36.5263	0.404701	0.201104	0.393236	0.427591	0.175477	0.346799	0.31433	0.2434	0.370337	0.42681	0.334738	0.243572	0.376061	0.291436	0.302487	NaN	NaN	NaN
70.5197	-36.5087	0.404704	0.201104	0.393239	0.427594	0.175478	0.326324	0.341509	0.210666	0.394921	0.426815	0.327888	0.249897	0.376068	0.285498	0.306454	NaN	NaN	NaN
70.5211	-36.4911	0.404707	0.201105	0.393242	0.427597	0.175479	0.326326	0.341511	0.2025	0.401063	0.42169	0.325527	0.254111	0.376072	0.281542	0.309098	NaN	NaN	NaN
70.5221	-36.4779	0.404709	0.188778	0.411041	0.4276	0.175479	0.326327	0.341512	0.202501	0.401066	0.406326	0.332131	0.254113	0.376076	0.281545	0.309103	NaN	NaN	NaN
70.5235	-36.4602	0.404712	0.180584	0.422882	0.427603	0.17548	0.326329	0.334578	0.210593	0.401069	0.401214	0.334331	0.254114	0.376081	0.275613	0.313069	NaN	NaN	NaN
70.5249	-36.4425	0.404715	0.180584	0.422884	0.427605	0.175481	0.32633	0.306892	0.242931	0.401071	0.401216	0.334332	0.254115	0.376084	0.27166	0.315712	NaN	NaN	NaN
70.5259	-36.4291	0.404718	0.180584	0.422888	0.427609	0.175481	0.326333	0.306894	0.242933	0.401075	0.401221	0.332053	0.256225	0.376092	0.271665	0.31572	NaN	NaN	NaN
70.5273	-36.4112	0.404721	0.180585	0.422892	0.427612	0.175482	0.326336	0.306897	0.242935	0.40108	0.401226	0.322934	0.264652	0.370792	0.275562	0.315728	NaN	NaN	NaN
70.5288	-36.3934	0.404724	0.180586	0.422896	0.427617	0.175483	0.326339	0.3069	0.242937	0.401086	0.401233	0.322939	0.264656	0.362846	0.281406	0.315738	NaN	NaN	NaN
70.5298	-36.38	0.404726	0.180586	0.422901	0.427622	0.175484	0.311008	0.327259	0.24294	0.401095	0.3859	0.329541	0.264662	0.36286	0.281416	0.315753	NaN	NaN	NaN
70.5311	-36.3622	0.404729	0.180587	0.422905	0.427627	0.175485	0.300807	0.333894	0.251029	0.375982	0.395641	0.333939	0.264666	0.362871	0.281424	0.315765	NaN	NaN	NaN
70.5325	-36.3444	0.404732	0.180587	0.42291	0.427632	0.175487	0.300811	0.306263	0.283353	0.369721	0.400632	0.333946	0.264672	0.362884	0.281432	0.315779	NaN	NaN	NaN
70.5336	-36.3311	0.404735	0.184683	0.416998	0.427638	0.175488	0.300814	0.306267	0.283356	0.369728	0.400641	0.333953	0.264677	0.362897	0.281441	0.315792	NaN	NaN	NaN
70.535	-36.3134	0.404738	0.201112	0.393281	0.427643	0.175489	0.300818	0.306272	0.283361	0.369735	0.400651	0.333961	0.264683	0.362912	0.281452	0.315808	NaN	NaN	NaN
70.5364	-36.2958	0.404741	0.201113	0.393285	0.427649	0.17549	0.300822	0.306276	0.283364	0.369742	0.385337	0.340557	0.264689	0.362925	0.281461	0.315822	NaN	NaN	NaN
70.5374	-36.2825	0.404744	0.201113	0.393289	0.427654	0.175491	0.300825	0.30628	0.283368	0.369749	0.375147	0.344953	0.264694	0.362938	0.28147	0.313141	NaN	NaN	NaN
70.5387	-36.2649	0.404746	0.201114	0.393293	0.427658	0.175492	0.300828	0.306283	0.283371	0.350956	0.390093	0.344958	0.264698	0.352345	0.289265	0.309112	NaN	NaN	NaN
70.54	-36.2472	0.404749	0.201115	0.393296	0.427662	0.175493	0.30083	0.306285	0.283373	0.33845	0.400049	0.344961	0.2647	0.349702	0.291217	0.309118	NaN	NaN	NaN
70.5411	-36.2339	0.404752	0.201115	0.393298	0.427663	0.175493	0.300831	0.285594	0.307615	0.33845	0.400049	0.344962	0.264701	0.349703	0.291217	0.30912	NaN	NaN	NaN
70.5425	-36.2162	0.404755	0.201115	0.3933	0.427665	0.175494	0.285535	0.29212	0.323761	0.33845	0.400049	0.344961	0.2647	0.349702	0.291217	0.309119	NaN	NaN	NaN
70.5438	-36.1984	0.404758	0.201116	0.3933	0.427665	0.175494	0.275358	0.305631	0.323759	0.338448	0.379649	0.353732	0.260382	0.349591	0.295107	0.309113	NaN	NaN	NaN
70.5448	-36.1851	0.404761	0.201116	0.393301	0.427664	0.175494	0.275357	0.30563	0.323756	0.338444	0.374554	0.355919	0.253913	0.349423	0.300942	0.307759	NaN	NaN	NaN
70.5462	-36.1672	0.404763	0.201116	0.393301	0.427663	0.175494	0.275356	0.305627	0.323753	0.33844	0.374549	0.355913	0.253909	0.349414	0.300935	0.302369	NaN	NaN	NaN
70.5475	-36.1494	0.404766	0.201116	0.393302	0.427663	0.175494	0.275355	0.305626	0.323751	0.325937	0.384489	0.355909	0.253907	0.346763	0.296932	0.306323	NaN	NaN	NaN
70.5485	-36.136	0.404769	0.201116	0.393303	0.427663	0.175494	0.275354	0.305624	0.323749	0.307218	0.399388	0.355905	0.247443	0.346598	0.298804	0.308957	NaN	NaN	NaN
70.5499	-36.1182	0.404772	0.201117	0.393306	0.427666	0.175495	0.275356	0.305627	0.323752	0.307221	0.399392	0.355909	0.238839	0.354322	0.300754	0.308964	NaN	NaN	NaN
70.5513	-36.1004	0.404775	0.201118	0.393308	0.427668	0.175495	0.275357	0.305628	0.323753	0.307222	0.399394	0.35591	0.24099	0.351735	0.294815	0.307545	NaN	NaN	NaN
70.5523	-36.0871	0.404778	0.201118	0.39331	0.42767	0.164822	0.290224	0.305628	0.323753	0.307222	0.389206	0.360295	0.25606	0.333603	0.290858	0.308839	NaN	NaN	NaN
70.5536	-36.0693	0.404781	0.201118	0.393312	0.427672	0.15772	0.30012	0.305629	0.323754	0.307223	0.373949	0.366864	0.269003	0.31806	0.290858	0.30884	NaN	NaN	NaN
70.555	-36.0516	0.404783	0.201119	0.393315	0.427674	0.157721	0.300121	0.30563	0.315552	0.313349	0.373951	0.3623	0.260273	0.333606	0.282949	0.31143	NaN	NaN	NaN
70.5563	-36.0339	0.404786	0.201119	0.393317	0.427676	0.157721	0.300122	0.305631	0.282811	0.33783	0.373952	0.355458	0.249356	0.35433	0.280974	0.308715	NaN	NaN	NaN
70.5573	-36.0206	0.404789	0.20112	0.39332	0.427679	0.157722	0.300124	0.305632	0.282812	0.337832	0.373954	0.35546	0.242907	0.362105	0.280977	0.30872	NaN	NaN	NaN
70.5586	-36.0029	0.404792	0.20112	0.393322	0.427681	0.157722	0.300125	0.305634	0.282813	0.337833	0.373956	0.355462	0.245057	0.359517	0.280978	0.306033	NaN	NaN	NaN
70.56	-35.9853	0.404795	0.201121	0.393324	0.427683	0.157723	0.300125	0.305634	0.282813	0.337833	0.373956	0.355461	0.253663	0.349153	0.280978	0.302001	NaN	NaN	NaN
70.561	-35.9721	0.404798	0.201121	0.393326	0.427685	0.157723	0.300127	0.305635	0.282814	0.337834	0.373957	0.355463	0.253664	0.349156	0.28098	0.302004	NaN	NaN	NaN
70.5623	-35.9545	0.404801	0.201122	0.393329	0.427687	0.157724	0.300128	0.305636	0.282815	0.337836	0.373959	0.353184	0.255768	0.349158	0.280981	0.29932	NaN	NaN	NaN
70.5636	-35.937	0.404803	0.201122	0.393332	0.427692	0.157724	0.300131	0.305639	0.282818	0.33784	0.373965	0.344077	0.257721	0.356941	0.280988	0.295301	NaN	NaN	NaN
70.5646	-35.9238	0.411353	0.193014	0.393336	0.427696	0.157725	0.300133	0.305642	0.28282	0.337844	0.37397	0.344082	0.253422	0.362129	0.280994	0.295309	NaN	NaN	NaN
70.5659	-35.9064	0.421209	0.180852	0.393339	0.4277	0.157726	0.300136	0.305645	0.282823	0.337848	0.373976	0.344087	0.253426	0.359492	0.282944	0.289949	NaN	NaN	NaN
70.5672	-35.8888	0.421211	0.180852	0.393343	0.427704	0.157727	0.300138	0.305648	0.282825	0.337852	0.37398	0.344092	0.253429	0.348921	0.290724	0.288615	NaN	NaN	NaN
70.5682	-35.8754	0.421212	0.180853	0.393345	0.427706	0.157727	0.300139	0.305649	0.282826	0.337853	0.373982	0.339539	0.257632	0.348923	0.290726	0.287276	NaN	NaN	NaN
70.5695	-35.858	0.421213	0.180853	0.393347	0.427708	0.157728	0.30014	0.305649	0.282826	0.337853	0.373982	0.332715	0.263931	0.340996	0.288644	0.287178	NaN	NaN	NaN
70.5709	-35.8405	0.421214	0.180854	0.393349	0.42771	0.157728	0.300141	0.30565	0.291003	0.331736	0.373982	0.332715	0.263931	0.335717	0.290552	0.288495	NaN	NaN	NaN
70.5719	-35.8274	0.421216	0.180854	0.393351	0.427711	0.157728	0.300141	0.30565	0.315573	0.31337	0.373982	0.332715	0.26393	0.330439	0.294437	0.285813	NaN	NaN	NaN
70.5732	-35.8099	0.421217	0.180855	0.393353	0.427713	0.157729	0.300142	0.30565	0.315573	0.31337	0.373983	0.330441	0.266031	0.322532	0.296307	0.284425	NaN	NaN	NaN
70.5744	-35.7924	0.421218	0.180855	0.393356	0.427716	0.157729	0.300143	0.305652	0.282829	0.337856	0.353668	0.330101	0.274428	0.322535	0.29038	0.288375	NaN	NaN	NaN
70.5754	-35.7793	0.421219	0.180856	0.387171	0.438328	0.15773	0.300145	0.305654	0.282831	0.337859	0.3486	0.332287	0.272277	0.325126	0.284458	0.292328	NaN	NaN	NaN
70.5767	-35.7618	0.421221	0.180856	0.36248	0.480695	0.157731	0.300148	0.298767	0.274548	0.350105	0.348604	0.332292	0.263675	0.33547	0.278542	0.290918	NaN	NaN	NaN
70.578	-35.7443	0.421222	0.180857	0.362484	0.480702	0.157732	0.300151	0.271268	0.282274	0.343483	0.368445	0.332299	0.26368	0.335481	0.270663	0.294849	NaN	NaN	NaN
70.579	-35.7312	0.421223	0.180858	0.362488	0.48071	0.157733	0.300156	0.271272	0.282279	0.337259	0.373409	0.332308	0.257238	0.343252	0.264761	0.298811	NaN	NaN	NaN
70.5803	-35.7138	0.421225	0.180858	0.362492	0.480716	0.157734	0.30016	0.271276	0.282283	0.337265	0.373418	0.332315	0.252948	0.348434	0.258862	0.30277	NaN	NaN	NaN
70.5815	-35.6963	0.421226	0.180859	0.362497	0.480725	0.157735	0.300164	0.27128	0.282288	0.337273	0.373428	0.332325	0.252954	0.345809	0.252939	0.308049	NaN	NaN	NaN
70.5825	-35.6832	0.421227	0.18086	0.362501	0.480732	0.157736	0.300168	0.271284	0.282292	0.33728	0.373437	0.332332	0.25296	0.337905	0.258754	0.308063	NaN	NaN	NaN
70.5838	-35.6657	0.421228	0.18086	0.362503	0.480736	0.157737	0.30017	0.271285	0.282294	0.337283	0.373441	0.332335	0.252962	0.335274	0.260693	0.30807	NaN	NaN	NaN
70.5851	-35.6483	0.42123	0.180861	0.362506	0.480739	0.157737	0.300171	0.271286	0.282295	0.337284	0.373443	0.336881	0.24877	0.335277	0.260695	0.308073	NaN	NaN	NaN
70.5861	-35.6352	0.421231	0.180861	0.362508	0.480742	0.157738	0.300173	0.271287	0.282297	0.337286	0.373444	0.343707	0.242476	0.335279	0.266604	0.304129	NaN	NaN	NaN
70.5873	-35.6177	0.421232	0.180862	0.362509	0.480743	0.157738	0.300173	0.271288	0.282297	0.337285	0.373444	0.343706	0.242476	0.335279	0.272515	0.300181	NaN	NaN	NaN
70.5886	-35.6002	0.421233	0.180862	0.362511	0.480744	0.157738	0.300173	0.271287	0.282296	0.337284	0.373442	0.343705	0.242475	0.335276	0.280403	0.294916	NaN	NaN	NaN
70.5895	-35.5871	0.421235	0.180862	0.362512	0.480744	0.157739	0.300172	0.271286	0.282294	0.355995	0.358568	0.343701	0.244618	0.332688	0.286321	0.294988	NaN	NaN	NaN
70.5908	-35.5696	0.421236	0.180862	0.362512	0.46988	0.147018	0.319955	0.271285	0.282292	0.36849	0.348642	0.343696	0.253209	0.322347	0.290266	0.295032	NaN	NaN	NaN
70.5921	-35.552	0.421237	0.180863	0.362512	0.426538	0.157324	0.32489	0.271283	0.28229	0.368485	0.348636	0.34369	0.253205	0.332882	0.282498	0.295023	NaN	NaN	NaN
70.5931	-35.5388	0.421238	0.180863	0.362516	0.426543	0.157325	0.314708	0.284792	0.282294	0.368493	0.338501	0.348069	0.253211	0.335533	0.280567	0.295036	NaN	NaN	NaN
70.5943	-35.5213	0.42124	0.180864	0.362521	0.42655	0.157326	0.299463	0.305032	0.282299	0.368502	0.32332	0.354631	0.253218	0.335548	0.28058	0.295053	NaN	NaN	NaN
70.5956	-35.5037	0.421241	0.180865	0.362525	0.426557	0.157327	0.299468	0.305037	0.282304	0.368512	0.323328	0.354642	0.253224	0.335564	0.280592	0.295069	NaN	NaN	NaN
70.5966	-35.4905	0.421242	0.180866	0.36253	0.426564	0.157329	0.299472	0.284427	0.290126	0.380758	0.323336	0.3501	0.257431	0.335579	0.27863	0.292376	NaN	NaN	NaN
70.5978	-35.4729	0.421243	0.180866	0.362533	0.426568	0.157329	0.299475	0.270715	0.281745	0.399102	0.32334	0.343283	0.255129	0.345933	0.270742	0.294965	NaN	NaN	NaN
70.5991	-35.4553	0.421245	0.180866	0.337892	0.468842	0.157329	0.299472	0.270713	0.281741	0.399094	0.323334	0.343275	0.252975	0.348506	0.270732	0.290927	NaN	NaN	NaN
70.6004	-35.4377	0.421246	0.180867	0.331748	0.479394	0.157329	0.299472	0.270712	0.273593	0.380191	0.343152	0.338728	0.248579	0.350921	0.270631	0.290848	NaN	NaN	NaN
70.6013	-35.4245	0.421247	0.180867	0.331749	0.479394	0.15733	0.299472	0.270712	0.249191	0.392255	0.348101	0.331914	0.252716	0.348221	0.270561	0.289451	NaN	NaN	NaN
70.6026	-35.4069	0.421249	0.180867	0.331751	0.479398	0.15733	0.299474	0.270713	0.241074	0.398356	0.348103	0.331917	0.244138	0.35592	0.26462	0.289352	NaN	NaN	NaN
70.6039	-35.3894	0.42125	0.180868	0.331753	0.479401	0.157331	0.299475	0.243325	0.273158	0.39836	0.327861	0.331567	0.248225	0.350531	0.264491	0.290592	NaN	NaN	NaN
70.6048	-35.3762	0.421251	0.193186	0.313936	0.479406	0.157332	0.299478	0.236494	0.281174	0.392116	0.327762	0.331483	0.243892	0.353005	0.258528	0.293147	NaN	NaN	NaN
70.6061	-35.3581	0.421252	0.201423	0.302036	0.479427	0.157334	0.29949	0.236503	0.281188	0.367193	0.347568	0.32471	0.245902	0.350302	0.256494	0.293086	NaN	NaN	NaN
70.6074	-35.3405	0.421254	0.201425	0.302042	0.479447	0.157337	0.284267	0.256705	0.281202	0.36722	0.347594	0.320207	0.241537	0.350118	0.25836	0.294391	NaN	NaN	NaN
70.6083	-35.3273	0.421255	0.201426	0.302048	0.479462	0.157339	0.274139	0.270159	0.281213	0.367239	0.347613	0.320225	0.24155	0.347516	0.260315	0.290404	NaN	NaN	NaN
70.6096	-35.3097	0.421256	0.201428	0.302054	0.479479	0.157341	0.274148	0.270168	0.281224	0.367261	0.347635	0.317981	0.243656	0.337015	0.273983	0.283823	NaN	NaN	NaN
70.6109	-35.2921	0.421257	0.201428	0.302055	0.479482	0.157342	0.274149	0.270169	0.281226	0.367263	0.347637	0.320247	0.241566	0.331753	0.28377	0.279887	NaN	NaN	NaN
70.6118	-35.2789	0.421259	0.201426	0.302048	0.479454	0.157339	0.274133	0.270151	0.281203	0.36722	0.332423	0.333536	0.235267	0.323796	0.295436	0.273207	NaN	NaN	NaN
70.613	-35.2613	0.42126	0.201425	0.302043	0.479435	0.157336	0.274123	0.270138	0.281187	0.36719	0.322302	0.3492	0.224795	0.321123	0.299301	0.267842	NaN	NaN	NaN
70.6142	-35.2436	0.421261	0.201423	0.302036	0.479405	0.157333	0.274107	0.270119	0.281163	0.367146	0.322263	0.35369	0.220585	0.321055	0.297258	0.269087	NaN	NaN	NaN
70.6152	-35.2304	0.421262	0.201424	0.302036	0.479404	0.157333	0.274106	0.270118	0.281161	0.367142	0.32226	0.349143	0.224765	0.321048	0.291336	0.273012	NaN	NaN	NaN
70.6165	-35.2128	0.421264	0.201424	0.302037	0.479404	0.157333	0.274105	0.270116	0.28116	0.367139	0.322257	0.340067	0.233122	0.321043	0.28345	0.280921	NaN	NaN	NaN
70.6177	-35.1952	0.421265	0.201424	0.302039	0.479408	0.157334	0.274106	0.270118	0.281161	0.367141	0.322259	0.331008	0.241478	0.321046	0.279517	0.287558	NaN	NaN	NaN
70.6187	-35.182	0.421266	0.201425	0.302041	0.479411	0.153791	0.273976	0.276844	0.281163	0.367144	0.312175	0.335361	0.24148	0.32105	0.27952	0.287562	NaN	NaN	NaN
70.6199	-35.1643	0.421268	0.201426	0.302044	0.479417	0.139649	0.27345	0.303712	0.281167	0.367151	0.297076	0.346416	0.237308	0.32106	0.279529	0.287573	NaN	NaN	NaN
70.6211	-35.1466	0.421269	0.201426	0.302046	0.479423	0.13965	0.273452	0.303716	0.28117	0.367156	0.29708	0.353225	0.231042	0.321068	0.279536	0.287582	NaN	NaN	NaN
70.622	-35.1333	0.42127	0.201427	0.302049	0.47943	0.139651	0.273455	0.30372	0.281174	0.367164	0.297085	0.353234	0.224635	0.328796	0.279546	0.287595	NaN	NaN	NaN
70.6233	-35.1157	0.421271	0.201428	0.302052	0.479435	0.139652	0.273458	0.303723	0.281177	0.367169	0.297089	0.346435	0.226634	0.333946	0.279552	0.287603	NaN	NaN	NaN
70.6246	-35.098	0.421273	0.201428	0.302053	0.479435	0.136119	0.27838	0.303722	0.281175	0.34227	0.316816	0.3419	0.230806	0.333941	0.279547	0.287597	NaN	NaN	NaN
70.6255	-35.0848	0.421274	0.201428	0.302054	0.479435	0.125537	0.293131	0.303721	0.281174	0.336056	0.321743	0.346428	0.22663	0.333937	0.279544	0.287593	NaN	NaN	NaN
70.6267	-35.0671	0.421275	0.201429	0.302056	0.479439	0.122016	0.298044	0.283193	0.305227	0.336059	0.311673	0.357582	0.220365	0.333941	0.279547	0.287598	NaN	NaN	NaN
70.6279	-35.0494	0.421276	0.20143	0.302058	0.479443	0.122017	0.298046	0.269538	0.321249	0.336062	0.296595	0.3641	0.220367	0.333946	0.279552	0.286265	NaN	NaN	NaN
70.6288	-35.0361	0.421278	0.20143	0.30206	0.479447	0.122017	0.298047	0.26954	0.321251	0.336064	0.296596	0.357296	0.226635	0.333951	0.279555	0.282257	NaN	NaN	NaN
70.6301	-35.0184	0.421279	0.20143	0.302061	0.479447	0.122017	0.298047	0.269539	0.32125	0.336062	0.296595	0.352761	0.230808	0.333947	0.279552	0.280916	NaN	NaN	NaN
70.6313	-35.0007	0.42128	0.201431	0.302062	0.436175	0.135835	0.298047	0.269539	0.32125	0.336062	0.296594	0.345964	0.234933	0.328636	0.28535	0.280916	NaN	NaN	NaN
70.6323	-34.9875	0.421282	0.201431	0.302063	0.425384	0.139282	0.282884	0.289658	0.321249	0.336061	0.296593	0.341437	0.232697	0.331094	0.283304	0.284846	NaN	NaN	NaN
70.6335	-34.9698	0.421283	0.201432	0.302065	0.425386	0.139283	0.272797	0.275751	0.353291	0.336062	0.296594	0.341437	0.230564	0.333664	0.279369	0.284793	NaN	NaN	NaN
70.6347	-34.9521	0.421284	0.201432	0.302066	0.425388	0.139283	0.272797	0.268941	0.361294	0.336062	0.296594	0.341437	0.230563	0.333663	0.279369	0.280783	NaN	NaN	NaN
70.6356	-34.9388	0.421285	0.201433	0.302068	0.42539	0.139284	0.272798	0.268942	0.361296	0.336063	0.296595	0.341438	0.230564	0.333665	0.279371	0.280785	NaN	NaN	NaN
70.6368	-34.9211	0.421287	0.201433	0.30207	0.425392	0.14986	0.258066	0.268942	0.361297	0.336064	0.296595	0.341439	0.224165	0.336122	0.283234	0.280786	NaN	NaN	NaN
70.6381	-34.9034	0.421288	0.201433	0.302071	0.425394	0.156926	0.248228	0.268943	0.361297	0.336064	0.296595	0.341438	0.219903	0.333382	0.289026	0.280786	NaN	NaN	NaN
70.639	-34.8901	0.421289	0.201434	0.302073	0.425396	0.156927	0.248229	0.268943	0.361298	0.336065	0.296595	0.341439	0.219903	0.333383	0.289027	0.280787	NaN	NaN	NaN
70.6402	-34.8724	0.42129	0.201434	0.302074	0.425397	0.156927	0.248229	0.268943	0.361297	0.336064	0.296594	0.341437	0.219902	0.333381	0.281153	0.286025	NaN	NaN	NaN
70.6414	-34.8548	0.421292	0.205554	0.296121	0.425398	0.156927	0.248229	0.268943	0.361297	0.336064	0.296594	0.341437	0.219902	0.325512	0.284976	0.287334	NaN	NaN	NaN
70.6427	-34.8371	0.421293	0.222077	0.272254	0.425399	0.149862	0.258067	0.268943	0.361296	0.336063	0.296593	0.341435	0.219901	0.320269	0.288832	0.287332	NaN	NaN	NaN
70.6436	-34.8235	0.421294	0.222078	0.272256	0.4254	0.139286	0.272801	0.268943	0.35314	0.342151	0.296593	0.341435	0.2199	0.320269	0.288831	0.287331	NaN	NaN	NaN
70.6448	-34.8058	0.421296	0.222078	0.272257	0.425401	0.139286	0.272801	0.268943	0.320589	0.366482	0.311672	0.334923	0.219899	0.317645	0.290758	0.29134	NaN	NaN	NaN
70.646	-34.7881	0.421297	0.222078	0.272258	0.425401	0.132241	0.282619	0.268942	0.320588	0.360259	0.326674	0.330577	0.219897	0.307175	0.292566	0.297944	NaN	NaN	NaN
70.6469	-34.7747	0.421298	0.222079	0.272259	0.425402	0.121695	0.297323	0.268942	0.304339	0.353781	0.341457	0.330575	0.219896	0.307173	0.288631	0.300563	NaN	NaN	NaN
70.6481	-34.757	0.421299	0.226216	0.266288	0.425403	0.121696	0.297323	0.268941	0.280021	0.365785	0.34638	0.330574	0.219895	0.307171	0.288629	0.300561	NaN	NaN	NaN
70.6494	-34.7392	0.421301	0.24281	0.24235	0.425403	0.121696	0.297323	0.268941	0.280021	0.365783	0.351419	0.31936	0.228227	0.304553	0.290553	0.300556	NaN	NaN	NaN
70.6503	-34.7258	0.421302	0.24281	0.242351	0.425405	0.121696	0.297324	0.268941	0.280021	0.365784	0.366566	0.310586	0.230309	0.296715	0.296338	0.300557	NaN	NaN	NaN
70.6515	-34.708	0.421303	0.242811	0.242353	0.42541	0.121697	0.297328	0.268945	0.280025	0.365791	0.371629	0.308418	0.234577	0.288994	0.298275	0.30057	NaN	NaN	NaN
70.6526	-34.6901	0.421305	0.242812	0.242355	0.425416	0.121697	0.297331	0.268948	0.280029	0.365798	0.371637	0.308424	0.240984	0.281321	0.298285	0.300582	NaN	NaN	NaN
70.6536	-34.6767	0.421306	0.242813	0.242357	0.425421	0.121698	0.297335	0.268951	0.280032	0.365804	0.371645	0.308429	0.240988	0.281329	0.298295	0.297915	NaN	NaN	NaN
70.6548	-34.6588	0.421307	0.242814	0.242359	0.425426	0.125211	0.292439	0.268954	0.280036	0.36581	0.371651	0.308434	0.240992	0.281335	0.298304	0.292572	NaN	NaN	NaN
70.656	-34.641	0.421308	0.242815	0.242361	0.425429	0.139291	0.272814	0.268955	0.280037	0.365813	0.356495	0.314957	0.232458	0.302029	0.290594	0.28589	NaN	NaN	NaN
70.6569	-34.6277	0.42131	0.242816	0.242362	0.403848	0.146189	0.272815	0.268957	0.280038	0.365815	0.346408	0.3193	0.230327	0.307209	0.288668	0.280548	NaN	NaN	NaN
70.6581	-34.6099	0.421311	0.242816	0.242363	0.371557	0.149468	0.282636	0.268958	0.24768	0.383877	0.331181	0.327983	0.223934	0.3149	0.280806	0.275104	NaN	NaN	NaN
70.6592	-34.5921	0.421312	0.242817	0.242366	0.371563	0.138919	0.297348	0.268963	0.239614	0.36513	0.330741	0.336668	0.213298	0.327731	0.269039	0.272294	NaN	NaN	NaN
70.6601	-34.5788	0.421314	0.242819	0.242369	0.37157	0.138921	0.282222	0.289044	0.239618	0.352748	0.315468	0.34073	0.211042	0.33538	0.261175	0.266849	NaN	NaN	NaN
70.6614	-34.5611	0.421315	0.226227	0.266319	0.350082	0.145803	0.26211	0.315809	0.239636	0.328049	0.310062	0.331279	0.217024	0.329862	0.258985	0.264012	NaN	NaN	NaN
70.6626	-34.5433	0.421316	0.217957	0.265991	0.33899	0.142057	0.251585	0.349087	0.247641	0.29725	0.309579	0.312889	0.22916	0.3191	0.26454	0.261231	NaN	NaN	NaN
70.6634	-34.53	0.421317	0.205576	0.26551	0.359844	0.131478	0.241107	0.368679	0.263521	0.284888	0.304337	0.299165	0.239314	0.305908	0.270161	0.259851	NaN	NaN	NaN
70.6646	-34.5123	0.421319	0.189111	0.270958	0.348545	0.138184	0.210977	0.38098	0.279031	0.278332	0.313835	0.281062	0.249354	0.292627	0.273722	0.259685	NaN	NaN	NaN
70.6657	-34.4946	0.42132	0.172703	0.264173	0.379557	0.14153	0.186057	0.359571	0.32637	0.28417	0.308652	0.269698	0.253159	0.281958	0.279246	0.260877	NaN	NaN	NaN
70.6666	-34.4814	0.421321	0.160438	0.269759	0.368445	0.141295	0.190733	0.325413	0.341544	0.295896	0.313342	0.27179	0.248888	0.279247	0.279129	0.260816	NaN	NaN	NaN
70.6678	-34.4637	0.421322	0.16044	0.269765	0.336465	0.14804	0.200543	0.271658	0.388923	0.314219	0.318581	0.27428	0.240662	0.279279	0.277207	0.262155	NaN	NaN	NaN
70.669	-34.4461	0.421324	0.164524	0.288248	0.273398	0.158336	0.225488	0.232071	0.47007	0.272385	0.318927	0.303615	0.2161	0.276903	0.281262	0.26231	NaN	NaN	NaN
70.6699	-34.4328	0.421325	0.176805	0.294918	0.231522	0.186316	0.216429	0.239453	0.512375	0.224392	0.319347	0.32868	0.199849	0.274627	0.281465	0.263763	NaN	NaN	NaN
70.671	-34.4151	0.421326	0.201457	0.289896	0.210919	0.200705	0.227179	0.253964	0.514677	0.206832	0.315169	0.356408	0.183674	0.272515	0.275909	0.269205	NaN	NaN	NaN
70.6722	-34.3973	0.421328	0.222104	0.272328	0.243102	0.197713	0.21757	0.274511	0.482639	0.243845	0.310818	0.365957	0.162827	0.288012	0.266213	0.285083	NaN	NaN	NaN
70.673	-34.384	0.421329	0.23038	0.260366	0.307204	0.177156	0.192525	0.300987	0.482338	0.27463	0.316213	0.352758	0.139543	0.313331	0.258238	0.303499	NaN	NaN	NaN
70.6742	-34.3661	0.42133	0.24283	0.230108	0.3927	0.142444	0.167239	0.320008	0.481039	0.317294	0.321303	0.330239	0.128784	0.32289	0.248091	0.327021	NaN	NaN	NaN
70.6754	-34.3481	0.421331	0.238671	0.211589	0.434769	0.12839	0.161943	0.319224	0.455463	0.36587	0.321264	0.30988	0.143203	0.296724	0.237893	0.345073	NaN	NaN	NaN
70.6763	-34.3346	0.421333	0.226232	0.21119	0.455514	0.124819	0.171688	0.298969	0.446734	0.390141	0.3112	0.300703	0.151404	0.281075	0.233723	0.348708	NaN	NaN	NaN
70.6775	-34.3166	0.421334	0.222096	0.186671	0.454177	0.141983	0.17169	0.298973	0.406125	0.395607	0.305769	0.295797	0.153262	0.28593	0.223912	0.343023	NaN	NaN	NaN
70.6787	-34.2984	0.421335	0.209697	0.198487	0.400362	0.152009	0.186307	0.30573	0.390113	0.376867	0.300359	0.293153	0.150959	0.303666	0.212337	0.33081	NaN	NaN	NaN
70.6796	-34.2849	0.421337	0.201456	0.210396	0.368356	0.144772	0.210628	0.326032	0.366344	0.358337	0.300084	0.295178	0.146714	0.313848	0.208511	0.320154	NaN	NaN	NaN
70.6808	-34.2669	0.421338	0.189111	0.252626	0.326555	0.137799	0.220348	0.359952	0.326662	0.333661	0.299699	0.303841	0.144633	0.316445	0.212406	0.300333	NaN	NaN	NaN
70.6819	-34.249	0.421339	0.180904	0.276724	0.305624	0.137802	0.220355	0.393983	0.286928	0.333685	0.294725	0.312754	0.142647	0.311425	0.227902	0.279387	NaN	NaN	NaN
70.6831	-34.2311	0.421341	0.180905	0.30122	0.263684	0.137803	0.225327	0.414653	0.28742	0.309515	0.299733	0.32185	0.142816	0.303966	0.245449	0.263834	NaN	NaN	NaN
70.684	-34.2177	0.421342	0.180906	0.301225	0.284997	0.137958	0.230544	0.408413	0.279576	0.303474	0.314758	0.324393	0.145049	0.301686	0.253397	0.257463	NaN	NaN	NaN
70.6851	-34.1999	0.421343	0.180905	0.301217	0.317029	0.148681	0.206309	0.40172	0.311952	0.279245	0.324742	0.331293	0.147303	0.301972	0.253577	0.260225	NaN	NaN	NaN
70.6863	-34.1821	0.421344	0.197338	0.277429	0.317013	0.155689	0.21647	0.347809	0.351955	0.291641	0.33005	0.329348	0.145285	0.312397	0.24206	0.270754	NaN	NaN	NaN
70.6872	-34.1688	0.421346	0.201456	0.259212	0.337998	0.155685	0.221449	0.31394	0.383805	0.30395	0.320186	0.32929	0.14527	0.317514	0.23236	0.282529	NaN	NaN	NaN
70.6883	-34.151	0.421347	0.213827	0.223006	0.337372	0.165942	0.221443	0.280055	0.399203	0.322102	0.320162	0.32025	0.149331	0.314755	0.224475	0.298217	NaN	NaN	NaN
70.6894	-34.1332	0.418095	0.226179	0.198861	0.336988	0.169259	0.226324	0.246296	0.406462	0.346308	0.32016	0.306752	0.155425	0.3016	0.226139	0.307297	NaN	NaN	NaN
70.6903	-34.1199	0.408362	0.23842	0.180599	0.336374	0.168984	0.225982	0.252702	0.398026	0.364467	0.310147	0.29986	0.159447	0.291096	0.229782	0.31382	NaN	NaN	NaN
70.6914	-34.1021	0.405128	0.242502	0.180603	0.304497	0.1757	0.220897	0.265943	0.365681	0.376299	0.304959	0.292907	0.161332	0.283101	0.233396	0.315004	NaN	NaN	NaN
70.6926	-34.0843	0.405131	0.242505	0.180606	0.262102	0.189293	0.20101	0.292408	0.333417	0.38193	0.30466	0.290442	0.163286	0.272651	0.233166	0.314814	NaN	NaN	NaN
70.6934	-34.0709	0.405133	0.242507	0.180608	0.262106	0.189295	0.191085	0.285398	0.34106	0.394009	0.294679	0.294761	0.157005	0.275084	0.227308	0.314663	NaN	NaN	NaN
70.6946	-34.0531	0.405136	0.242508	0.186693	0.251685	0.182299	0.180993	0.298324	0.356883	0.375478	0.294383	0.301234	0.154916	0.277626	0.217672	0.313181	NaN	NaN	NaN
70.6957	-34.0352	0.405139	0.242511	0.211087	0.241676	0.161643	0.195558	0.298339	0.36497	0.357141	0.294197	0.30556	0.146553	0.287755	0.209982	0.310428	NaN	NaN	NaN
70.6966	-34.0218	0.405142	0.242515	0.211092	0.262917	0.154843	0.190613	0.304959	0.389251	0.339093	0.294229	0.303359	0.146531	0.290335	0.208089	0.306486	NaN	NaN	NaN
70.6977	-34.0039	0.405145	0.242518	0.211097	0.305467	0.141225	0.195574	0.298385	0.405482	0.327058	0.294256	0.294437	0.154765	0.300724	0.204394	0.301308	NaN	NaN	NaN
70.6988	-33.986	0.414863	0.23028	0.211101	0.337471	0.130991	0.200533	0.291809	0.437981	0.30293	0.30926	0.292479	0.152754	0.316374	0.216228	0.287184	NaN	NaN	NaN
70.6997	-33.9726	0.421361	0.222117	0.211097	0.369533	0.127709	0.210658	0.278854	0.438296	0.290822	0.319225	0.308296	0.142592	0.332136	0.226209	0.272977	NaN	NaN	NaN
70.7008	-33.9547	0.421362	0.205588	0.234958	0.380217	0.152272	0.201553	0.306664	0.391261	0.291245	0.314628	0.342299	0.1222	0.350837	0.232517	0.257539	NaN	NaN	NaN
70.702	-33.9368	0.421364	0.201466	0.240906	0.423096	0.170203	0.177478	0.300432	0.399833	0.273172	0.324712	0.347052	0.120229	0.366696	0.226975	0.256341	NaN	NaN	NaN
70.7028	-33.9234	0.421365	0.201465	0.240903	0.42308	0.1702	0.177473	0.300415	0.399797	0.273154	0.339728	0.326985	0.120065	0.381903	0.217235	0.269413	NaN	NaN	NaN
70.704	-33.9055	0.421366	0.193227	0.252807	0.423068	0.152602	0.186975	0.313532	0.407744	0.27314	0.344726	0.306797	0.126103	0.381483	0.201566	0.295544	NaN	NaN	NaN
70.7051	-33.8876	0.421368	0.180908	0.270628	0.423068	0.138564	0.186595	0.292671	0.430906	0.297337	0.344724	0.306795	0.115661	0.370666	0.195501	0.317778	NaN	NaN	NaN
70.7059	-33.8741	0.421369	0.180909	0.270629	0.423071	0.138564	0.171704	0.299005	0.43867	0.303383	0.344725	0.306796	0.113576	0.360168	0.197282	0.326979	NaN	NaN	NaN
70.707	-33.8562	0.42137	0.180909	0.270631	0.423074	0.138565	0.171705	0.299007	0.430539	0.290951	0.359436	0.306798	0.113576	0.34976	0.195236	0.336151	NaN	NaN	NaN
70.7082	-33.8383	0.421372	0.18091	0.270633	0.423077	0.138566	0.171706	0.299008	0.398076	0.302798	0.369234	0.297815	0.11764	0.347027	0.199	0.337453	NaN	NaN	NaN
70.709	-33.8249	0.421373	0.180911	0.270636	0.423085	0.138567	0.171708	0.299016	0.39809	0.302807	0.354176	0.304305	0.11139	0.354644	0.195153	0.338744	NaN	NaN	NaN
70.7102	-33.807	0.421374	0.180912	0.270641	0.423098	0.138569	0.16675	0.305637	0.390005	0.308858	0.344167	0.319879	0.101104	0.354683	0.187464	0.338637	NaN	NaN	NaN
70.7113	-33.7891	0.421375	0.180913	0.270646	0.455361	0.124767	0.146874	0.338659	0.357669	0.333003	0.324151	0.337546	0.101199	0.344596	0.175941	0.341133	NaN	NaN	NaN
70.7121	-33.7756	0.421377	0.180914	0.270651	0.476929	0.107391	0.146651	0.344936	0.37354	0.333018	0.314163	0.337372	0.105323	0.336826	0.172028	0.340977	NaN	NaN	NaN
70.7132	-33.7577	0.411652	0.19308	0.270657	0.476951	0.103898	0.151511	0.324721	0.397331	0.333043	0.294213	0.332516	0.105179	0.346871	0.17007	0.334245	NaN	NaN	NaN
70.7143	-33.7398	0.405191	0.201193	0.270665	0.455424	0.0968095	0.190728	0.298384	0.397378	0.320754	0.294037	0.323382	0.102956	0.359467	0.16812	0.323545	NaN	NaN	NaN
70.7152	-33.7264	0.405194	0.201196	0.270676	0.423199	0.103619	0.21046	0.278626	0.397436	0.302344	0.293765	0.323152	0.0987381	0.364415	0.166148	0.318172	NaN	NaN	NaN
70.7163	-33.7085	0.405197	0.2012	0.270687	0.423235	0.103621	0.235332	0.245626	0.373222	0.314319	0.293705	0.318631	0.102825	0.359252	0.156523	0.312661	NaN	NaN	NaN
70.7174	-33.6906	0.4052	0.201203	0.270698	0.423266	0.103624	0.245317	0.232416	0.357122	0.301825	0.293326	0.318308	0.111039	0.351546	0.152645	0.304591	NaN	NaN	NaN
70.7182	-33.6772	0.4149	0.18904	0.27071	0.423304	0.103627	0.245338	0.21228	0.38094	0.301871	0.293374	0.31613	0.113099	0.343861	0.158335	0.296736	NaN	NaN	NaN
70.7193	-33.6593	0.421386	0.180932	0.270717	0.423324	0.103628	0.225421	0.225303	0.396802	0.301894	0.293398	0.316161	0.113104	0.341319	0.164066	0.287568	NaN	NaN	NaN
70.7205	-33.6414	0.421387	0.176829	0.276665	0.423342	0.10363	0.220458	0.231911	0.396834	0.301914	0.293419	0.316189	0.113109	0.341371	0.175588	0.28119	NaN	NaN	NaN
70.7216	-33.6234	0.421388	0.160463	0.300388	0.423359	0.107117	0.215608	0.2588	0.365186	0.326531	0.278908	0.318553	0.11941	0.339162	0.177638	0.285395	NaN	NaN	NaN
70.7224	-33.6098	0.42139	0.160463	0.300387	0.423354	0.117592	0.201014	0.279005	0.357561	0.320627	0.288964	0.323316	0.11955	0.336878	0.179669	0.28821	NaN	NaN	NaN
70.7235	-33.5918	0.421391	0.160463	0.300387	0.42335	0.12109	0.196143	0.306017	0.366272	0.302755	0.289164	0.339255	0.115627	0.339936	0.177966	0.293764	NaN	NaN	NaN
70.7246	-33.5736	0.421392	0.160463	0.300382	0.423336	0.124585	0.191271	0.333093	0.38312	0.284955	0.294445	0.346389	0.11163	0.350672	0.172422	0.30193	NaN	NaN	NaN
70.7254	-33.56	0.421394	0.160463	0.300383	0.423335	0.135092	0.176653	0.33309	0.41568	0.260754	0.29444	0.350902	0.113771	0.356098	0.170625	0.304733	NaN	NaN	NaN
70.7265	-33.5419	0.421395	0.160463	0.300382	0.42333	0.1386	0.176736	0.326461	0.440158	0.24259	0.314438	0.342246	0.113769	0.369175	0.172676	0.303586	NaN	NaN	NaN
70.7277	-33.5237	0.421396	0.160463	0.300379	0.423321	0.138599	0.19663	0.286389	0.456103	0.242581	0.319432	0.340061	0.113765	0.369135	0.180382	0.298344	NaN	NaN	NaN
70.7285	-33.51	0.421397	0.160463	0.300379	0.423316	0.138599	0.196628	0.266122	0.48002	0.224154	0.334117	0.335532	0.117892	0.369111	0.178445	0.295619	NaN	NaN	NaN
70.7295	-33.4918	0.421399	0.160463	0.27595	0.465292	0.1386	0.196629	0.266123	0.480025	0.205774	0.348804	0.328768	0.113631	0.368759	0.174455	0.29405	NaN	NaN	NaN
70.7307	-33.4736	0.4214	0.160464	0.26986	0.475772	0.1386	0.19165	0.272753	0.471849	0.187361	0.358339	0.32408	0.107272	0.370879	0.162755	0.293643	NaN	NaN	NaN
70.7315	-33.4599	0.421401	0.160464	0.269863	0.475785	0.131588	0.186492	0.292621	0.447365	0.193244	0.353095	0.321563	0.105092	0.373157	0.153066	0.293351	NaN	NaN	NaN
70.7326	-33.4417	0.421403	0.160466	0.269869	0.475804	0.121092	0.181247	0.319098	0.414801	0.199051	0.352738	0.316814	0.0987373	0.375224	0.152907	0.286496	NaN	NaN	NaN
70.7337	-33.4234	0.421404	0.160469	0.275978	0.465386	0.110611	0.185944	0.312082	0.39812	0.204771	0.357325	0.307638	0.0985821	0.380094	0.150903	0.278456	NaN	NaN	NaN
70.7345	-33.4097	0.421405	0.148228	0.312073	0.401704	0.113924	0.185758	0.311838	0.381631	0.222745	0.347267	0.305191	0.100567	0.380017	0.141295	0.280946	NaN	NaN	NaN
70.7356	-33.3914	0.421407	0.140092	0.317792	0.369362	0.113675	0.185392	0.311285	0.372958	0.252819	0.34235	0.296209	0.110817	0.369722	0.133597	0.282114	NaN	NaN	NaN
70.7367	-33.3732	0.421408	0.140093	0.287299	0.389661	0.120442	0.160644	0.323873	0.372361	0.276876	0.33241	0.289373	0.121064	0.367228	0.131686	0.283467	NaN	NaN	NaN
70.7375	-33.3595	0.421409	0.140095	0.256908	0.441927	0.120445	0.145899	0.330159	0.364006	0.307177	0.317717	0.289326	0.123119	0.359483	0.137358	0.286208	NaN	NaN	NaN
70.7386	-33.3412	0.421411	0.140096	0.238729	0.473238	0.120447	0.140988	0.336753	0.355979	0.343942	0.308328	0.285136	0.121078	0.349101	0.144913	0.295588	NaN	NaN	NaN
70.7397	-33.323	0.421412	0.140097	0.256918	0.441961	0.134382	0.151126	0.317526	0.340346	0.374955	0.294004	0.292123	0.115021	0.333705	0.156317	0.305082	NaN	NaN	NaN
70.7405	-33.3094	0.421413	0.140097	0.28732	0.421812	0.138102	0.181121	0.292003	0.333155	0.375687	0.289507	0.29918	0.113133	0.326265	0.164049	0.307984	NaN	NaN	NaN
70.7416	-33.2912	0.421414	0.140095	0.323932	0.412525	0.138476	0.216435	0.293613	0.35913	0.32819	0.285158	0.310884	0.117589	0.324392	0.170101	0.303055	NaN	NaN	NaN
70.7427	-33.2729	0.421416	0.140094	0.330039	0.466585	0.124879	0.241659	0.294524	0.474847	0.231479	0.285601	0.318035	0.124072	0.348525	0.170606	0.286276	NaN	NaN	NaN
70.7435	-33.2592	0.421417	0.152308	0.312296	0.509779	0.111106	0.241645	0.308114	0.532997	0.17669	0.2956	0.318169	0.122027	0.393172	0.16912	0.265429	NaN	NaN	NaN
70.7445	-33.2408	0.421418	0.160475	0.300443	0.531427	0.104207	0.211629	0.334445	0.573956	0.158416	0.295576	0.311373	0.107318	0.461113	0.154045	0.248341	NaN	NaN	NaN
70.7456	-33.2224	0.42142	0.160476	0.300446	0.498948	0.104039	0.211319	0.327186	0.556453	0.170336	0.295176	0.308776	0.0947146	0.502743	0.129115	0.242819	NaN	NaN	NaN
70.7464	-33.2086	0.421421	0.160476	0.294331	0.487875	0.103927	0.221069	0.306825	0.522738	0.194427	0.289872	0.306182	0.100834	0.494582	0.134791	0.230863	NaN	NaN	NaN
70.7475	-33.1902	0.421422	0.160477	0.269919	0.529905	0.0969359	0.230821	0.300056	0.473199	0.218448	0.279583	0.307993	0.117375	0.455097	0.146107	0.216226	NaN	NaN	NaN
70.7486	-33.1719	0.421424	0.160478	0.269923	0.486739	0.100215	0.245426	0.300065	0.44045	0.236534	0.27451	0.305582	0.12354	0.420736	0.151588	0.215979	NaN	NaN	NaN
70.7495	-33.1581	0.421425	0.160479	0.269929	0.47599	0.103646	0.245433	0.300078	0.440482	0.21812	0.289197	0.301115	0.123485	0.407449	0.151433	0.218445	NaN	NaN	NaN
70.7506	-33.1398	0.421426	0.160481	0.269936	0.476017	0.103648	0.245445	0.300098	0.44053	0.212002	0.294111	0.29442	0.117159	0.414951	0.151376	0.218398	NaN	NaN	NaN
70.7521	-33.1218	0.421427	0.160482	0.269943	0.47604	0.103649	0.245455	0.279792	0.448188	0.242538	0.279462	0.289964	0.110876	0.427799	0.151388	0.218428	NaN	NaN	NaN
70.7536	-33.1086	0.414967	0.168569	0.269946	0.465275	0.107081	0.245458	0.259523	0.44763	0.273022	0.269679	0.283257	0.106647	0.440594	0.149471	0.219727	NaN	NaN	NaN
70.756	-33.0916	0.405304	0.1807	0.269948	0.4223	0.120783	0.245461	0.232563	0.455022	0.291198	0.264694	0.285416	0.100433	0.448274	0.141797	0.224891	NaN	NaN	NaN
70.7591	-33.0755	0.405307	0.1807	0.269946	0.422289	0.120782	0.230491	0.252421	0.43868	0.303289	0.244766	0.298482	0.0880676	0.458419	0.137955	0.227446	NaN	NaN	NaN
70.7618	-33.0642	0.40531	0.180698	0.26994	0.422269	0.131253	0.205939	0.265632	0.438628	0.303261	0.244746	0.307412	0.0798841	0.458294	0.132198	0.231269	NaN	NaN	NaN
70.7658	-33.0503	0.405313	0.180698	0.269938	0.422258	0.13825	0.196193	0.265622	0.438598	0.303245	0.244735	0.32086	0.0758655	0.448019	0.134104	0.229955	NaN	NaN	NaN
70.7704	-33.0378	0.405316	0.180697	0.269936	0.422248	0.138249	0.176332	0.292057	0.438569	0.30323	0.244723	0.332083	0.0738876	0.43775	0.143675	0.223489	NaN	NaN	NaN
70.7754	-33.027	0.405319	0.180696	0.269931	0.422229	0.138246	0.171373	0.29864	0.438519	0.284713	0.259356	0.338799	0.0822187	0.419796	0.155175	0.215724	NaN	NaN	NaN
70.7794	-33.0202	0.405321	0.180695	0.269927	0.422212	0.138245	0.171369	0.298623	0.438477	0.272394	0.269096	0.332008	0.0987478	0.406967	0.160927	0.21183	NaN	NaN	NaN
70.785	-33.0127	0.405324	0.180694	0.269923	0.422199	0.131247	0.181097	0.312104	0.430675	0.266342	0.279034	0.302976	0.117161	0.411997	0.151309	0.216925	NaN	NaN	NaN
70.7907	-33.0059	0.405327	0.180693	0.269921	0.422187	0.113798	0.205379	0.332379	0.439355	0.242162	0.293977	0.263001	0.104303	0.46542	0.130232	0.225793	NaN	NaN	NaN
70.795	-33.0009	0.40533	0.180693	0.26992	0.422183	0.103358	0.219923	0.332372	0.43934	0.242156	0.293968	0.245209	0.0937946	0.498444	0.12259	0.230921	NaN	NaN	NaN
70.8008	-32.9946	0.405333	0.180693	0.26992	0.42218	0.103358	0.219921	0.332367	0.439331	0.242153	0.293963	0.238549	0.101955	0.495872	0.13405	0.224514	NaN	NaN	NaN
70.8067	-32.9892	0.405336	0.180693	0.26992	0.390037	0.127544	0.20052	0.332363	0.439321	0.24215	0.313936	0.24105	0.110342	0.483526	0.134133	0.224619	NaN	NaN	NaN
70.8111	-32.9856	0.405339	0.180694	0.269923	0.36867	0.137861	0.195664	0.332367	0.455652	0.230071	0.318945	0.252241	0.112579	0.471004	0.13609	0.22471	NaN	NaN	NaN
70.8171	-32.9812	0.405342	0.180694	0.269924	0.368672	0.137862	0.195665	0.352688	0.472615	0.224371	0.299376	0.267842	0.116922	0.461274	0.138112	0.226194	NaN	NaN	NaN
70.823	-32.9769	0.405345	0.180694	0.269925	0.411458	0.124197	0.210545	0.346404	0.489416	0.206285	NaN	NaN	NaN	NaN	0.149761	0.226521	NaN	NaN	NaN
66.7799	-44.2213	NaN	NaN	NaN	NaN	NaN	NaN	NaN	NaN	NaN	NaN	NaN	NaN	NaN	NaN	NaN	NaN	NaN	NaN
66.7832	-44.2203	NaN	NaN	NaN	NaN	NaN	NaN	NaN	NaN	NaN	NaN	NaN	NaN	NaN	NaN	NaN	NaN	NaN	NaN
66.7848	-44.2199	NaN	NaN	NaN	NaN	NaN	NaN	NaN	0.292557	NaN	NaN	NaN	NaN	NaN	NaN	NaN	NaN	NaN	NaN
66.7881	-44.2189	0.382628	0.313758	NaN	NaN	NaN	NaN	0.36596	0.292557	NaN	NaN	NaN	NaN	NaN	NaN	NaN	NaN	NaN	NaN
66.7897	-44.2185	0.386114	0.309621	NaN	NaN	NaN	NaN	0.372974	0.292556	NaN	NaN	NaN	NaN	NaN	NaN	NaN	NaN	NaN	NaN
66.793	-44.2175	0.38948	0.305486	NaN	NaN	NaN	NaN	0.387012	0.292565	NaN	NaN	NaN	NaN	NaN	NaN	NaN	NaN	NaN	NaN
66.7962	-44.2166	0.38948	0.309703	NaN	NaN	NaN	NaN	0.387043	0.292586	NaN	NaN	NaN	NaN	NaN	NaN	NaN	NaN	NaN	NaN
66.7978	-44.2161	0.386116	0.318069	NaN	NaN	NaN	NaN	0.387075	0.292607	NaN	NaN	NaN	NaN	NaN	NaN	NaN	NaN	NaN	NaN
66.8011	-44.2152	0.379155	0.334826	0.535139	0.475068	NaN	NaN	0.373077	0.29263	NaN	NaN	NaN	NaN	NaN	NaN	NaN	NaN	NaN	NaN
66.8044	-44.2142	0.372224	0.347376	0.522677	0.463639	0.195485	0.357496	0.359067	0.292655	NaN	NaN	NaN	NaN	NaN	NaN	NaN	NaN	NaN	NaN
66.806	-44.2137	0.372226	0.347383	0.516304	0.463428	0.19907	0.362811	0.352071	0.292678	NaN	NaN	NaN	NaN	NaN	NaN	NaN	NaN	NaN	NaN
66.8093	-44.2126	0.372228	0.347389	0.503545	0.485367	0.199076	0.373416	0.33805	0.292698	NaN	NaN	NaN	NaN	NaN	NaN	NaN	NaN	NaN	NaN
66.8109	-44.2122	0.37223	0.347394	0.497181	0.496336	0.199083	0.378733	0.331042	0.292715	NaN	NaN	NaN	NaN	NaN	NaN	NaN	NaN	NaN	NaN
66.8142	-44.2112	0.379162	0.347578	0.48503	0.496359	0.199089	0.394665	0.30997	0.292732	NaN	NaN	NaN	NaN	NaN	NaN	NaN	NaN	NaN	NaN
66.8174	-44.2103	0.386122	0.347758	0.472846	0.496367	0.199092	0.405293	0.295914	0.292738	NaN	NaN	NaN	NaN	NaN	NaN	NaN	NaN	NaN	NaN
66.8191	-44.2098	0.389486	0.347845	0.466741	0.496361	0.199093	0.410602	0.288876	0.292733	NaN	NaN	NaN	NaN	NaN	NaN	NaN	NaN	NaN	NaN
66.8223	-44.2089	0.395974	0.339543	0.466738	0.496354	0.199094	0.426554	0.267772	0.292728	NaN	NaN	NaN	NaN	NaN	NaN	NaN	NaN	NaN	NaN
66.8256	-44.208	0.402416	0.33124	0.466732	0.496344	0.199094	0.437196	0.253695	0.292719	NaN	NaN	NaN	NaN	NaN	NaN	NaN	NaN	NaN	NaN
66.8272	-44.2075	0.405643	0.327088	0.466724	0.49633	0.199093	0.44251	0.24665	0.292709	NaN	NaN	NaN	NaN	NaN	NaN	NaN	NaN	NaN	NaN
66.8305	-44.2065	0.405643	0.327087	0.466716	0.496317	0.199093	0.437159	0.253683	0.292698	NaN	NaN	NaN	NaN	NaN	NaN	NaN	NaN	NaN	NaN
66.8321	-44.206	0.405644	0.327083	0.466704	0.496297	0.199091	0.426473	0.267749	0.292682	NaN	NaN	NaN	NaN	NaN	NaN	NaN	NaN	NaN	NaN
66.8354	-44.205	0.402419	0.331228	0.466685	0.496266	0.199087	0.378616	0.331037	0.292657	NaN	NaN	NaN	NaN	NaN	NaN	NaN	NaN	NaN	NaN
66.8386	-44.204	0.395978	0.339524	0.466667	0.496237	0.199084	0.320536	0.408181	0.292635	NaN	NaN	NaN	NaN	NaN	NaN	NaN	NaN	NaN	NaN
66.8403	-44.2035	0.392764	0.343673	0.466662	0.496229	0.199084	0.294271	0.443189	0.292628	NaN	NaN	NaN	NaN	NaN	NaN	NaN	NaN	NaN	NaN
66.8435	-44.2025	0.386129	0.343491	0.47887	0.496247	0.19909	0.268088	0.47822	0.292642	NaN	NaN	NaN	NaN	NaN	NaN	NaN	NaN	NaN	NaN
66.8452	-44.202	0.382651	0.343408	0.484969	0.496259	0.199094	0.268095	0.478236	0.292651	NaN	NaN	NaN	NaN	NaN	NaN	NaN	NaN	NaN	NaN
66.8485	-44.2011	0.375715	0.343238	0.497146	0.496277	0.199099	0.27334	0.471262	0.292665	NaN	NaN	NaN	NaN	NaN	NaN	NaN	NaN	NaN	NaN
66.8517	-44.2002	0.37226	0.347395	0.497165	0.496302	0.199106	0.289082	0.450281	0.292684	NaN	NaN	NaN	NaN	NaN	NaN	NaN	NaN	NaN	NaN
66.8534	-44.1997	0.372262	0.347401	0.497184	0.496328	0.199112	0.294344	0.44331	0.292703	NaN	NaN	NaN	NaN	NaN	NaN	NaN	NaN	NaN	NaN
66.8566	-44.1988	0.372264	0.343162	0.503289	0.496354	0.199119	0.304868	0.429323	0.292723	NaN	NaN	NaN	NaN	NaN	NaN	NaN	NaN	NaN	NaN
66.8599	-44.1979	0.379185	0.326402	0.515459	0.507592	0.195547	0.310144	0.422337	0.292741	NaN	NaN	NaN	NaN	NaN	NaN	NaN	NaN	NaN	NaN
66.8615	-44.1974	0.382657	0.318039	0.521547	0.518843	0.191973	0.31016	0.422367	0.292759	NaN	NaN	NaN	NaN	NaN	NaN	NaN	NaN	NaN	NaN
66.8648	-44.1964	0.389496	0.305547	0.527624	0.541348	0.184808	0.310171	0.422387	0.292771	NaN	NaN	NaN	NaN	NaN	NaN	NaN	NaN	NaN	NaN
66.8665	-44.1959	0.389497	0.305548	0.52763	0.552615	0.181222	0.310176	0.422393	0.292776	NaN	NaN	NaN	NaN	NaN	NaN	NaN	NaN	NaN	NaN
66.8697	-44.1948	0.389497	0.30555	0.527638	0.552627	0.181226	0.320707	0.408375	0.292783	NaN	NaN	NaN	NaN	NaN	NaN	NaN	NaN	NaN	NaN
66.873	-44.1938	0.389498	0.305551	0.527638	0.552625	0.181227	0.331247	0.394332	0.292783	NaN	NaN	NaN	NaN	NaN	NaN	NaN	NaN	NaN	NaN
66.8746	-44.1933	0.389499	0.30555	0.527633	0.552616	0.181228	0.336519	0.387298	0.292777	NaN	NaN	NaN	NaN	NaN	NaN	NaN	NaN	NaN	NaN
66.8779	-44.1923	0.389499	0.30555	0.527627	0.552606	0.181229	0.336514	0.387288	0.292771	NaN	NaN	NaN	NaN	NaN	NaN	NaN	NaN	NaN	NaN
66.8812	-44.1914	0.3895	0.305549	0.527621	0.552596	0.18123	0.336508	0.387277	0.292765	NaN	NaN	NaN	NaN	NaN	NaN	NaN	NaN	NaN	NaN
66.8828	-44.1909	0.389501	0.305549	0.527617	0.552589	0.181231	0.341779	0.380253	0.292761	NaN	NaN	NaN	NaN	NaN	NaN	NaN	NaN	NaN	NaN
66.8861	-44.19	0.389501	0.31398	0.515481	0.552579	0.181232	0.352332	0.366203	0.292755	NaN	NaN	NaN	NaN	NaN	NaN	NaN	NaN	NaN	NaN
66.8877	-44.1896	0.389502	0.318202	0.509401	0.552567	0.181232	0.35761	0.359169	0.292747	NaN	NaN	NaN	NaN	NaN	NaN	NaN	NaN	NaN	NaN
66.891	-44.1887	0.389502	0.330893	0.491151	0.55255	0.181232	0.362888	0.359285	0.284375	NaN	NaN	NaN	NaN	NaN	NaN	NaN	NaN	NaN	NaN
66.8943	-44.1877	0.382669	0.347686	0.478969	0.552536	0.181233	0.373456	0.359546	0.267637	NaN	NaN	NaN	NaN	NaN	NaN	NaN	NaN	NaN	NaN
66.8959	-44.1872	0.379204	0.356097	0.472865	0.552517	0.181232	0.378736	0.359666	0.259262	NaN	NaN	NaN	NaN	NaN	NaN	NaN	NaN	NaN	NaN
66.8992	-44.1862	0.372295	0.37294	0.460652	0.552483	0.18123	0.38931	0.352738	0.250879	NaN	NaN	NaN	NaN	NaN	NaN	NaN	NaN	NaN	NaN
66.9025	-44.1852	0.372297	0.381473	0.44843	0.552452	0.181228	0.389285	0.352712	0.250865	NaN	NaN	NaN	NaN	NaN	NaN	NaN	NaN	NaN	NaN
66.9041	-44.1847	0.372299	0.385744	0.442309	0.552428	0.181227	0.389265	0.352693	0.250855	NaN	NaN	NaN	NaN	NaN	NaN	NaN	NaN	NaN	NaN
66.9074	-44.1837	0.372301	0.390022	0.436186	0.55241	0.181227	0.389251	0.352678	0.250848	NaN	NaN	NaN	NaN	NaN	NaN	NaN	NaN	NaN	NaN
66.909	-44.1832	0.372303	0.390019	0.436178	0.541142	0.184814	0.389235	0.352662	0.25084	NaN	NaN	NaN	NaN	NaN	NaN	NaN	NaN	NaN	NaN
66.9123	-44.1822	0.372305	0.390017	0.436175	0.518668	0.191983	0.389227	0.352654	0.250836	NaN	NaN	NaN	NaN	NaN	NaN	NaN	NaN	NaN	NaN
66.9156	-44.1812	0.372307	0.390017	0.436175	0.496244	0.199142	0.389224	0.35265	0.250835	NaN	NaN	NaN	NaN	NaN	NaN	NaN	NaN	NaN	NaN
66.9172	-44.1808	0.372309	0.390017	0.436175	0.496242	0.199144	0.389221	0.352647	0.250834	NaN	NaN	NaN	NaN	NaN	NaN	NaN	NaN	NaN	NaN
66.9205	-44.1798	0.372311	0.381464	0.448407	0.49625	0.199147	0.389229	0.352654	0.250839	NaN	NaN	NaN	NaN	NaN	NaN	NaN	NaN	NaN	NaN
66.9238	-44.1789	0.372313	0.372933	0.460628	0.496273	0.199153	0.389251	0.352676	0.250852	NaN	NaN	NaN	NaN	NaN	NaN	NaN	NaN	NaN	NaN
66.9254	-44.1784	0.372315	0.368676	0.466734	0.49629	0.199158	0.389267	0.352691	0.250862	NaN	NaN	NaN	NaN	NaN	NaN	NaN	NaN	NaN	NaN
66.9287	-44.1775	0.372317	0.368681	0.466748	0.49631	0.195488	0.394422	0.35271	0.250874	NaN	NaN	NaN	NaN	NaN	NaN	NaN	NaN	NaN	NaN
66.9303	-44.177	0.372319	0.368687	0.466765	0.496333	0.191821	0.399578	0.352733	0.250888	NaN	NaN	NaN	NaN	NaN	NaN	NaN	NaN	NaN	NaN
66.9336	-44.176	0.372321	0.368693	0.466781	0.496358	0.184488	0.409861	0.352756	0.250902	NaN	NaN	NaN	NaN	NaN	NaN	NaN	NaN	NaN	NaN
66.9369	-44.175	0.372323	0.364436	0.4729	0.496384	0.180829	0.415015	0.352781	0.250918	NaN	NaN	NaN	NaN	NaN	NaN	NaN	NaN	NaN	NaN
66.9385	-44.1745	0.372325	0.360184	0.479013	0.49641	0.180835	0.415043	0.352806	0.250933	NaN	NaN	NaN	NaN	NaN	NaN	NaN	NaN	NaN	NaN
66.9418	-44.1735	0.372327	0.351686	0.484823	0.507388	0.180841	0.409765	0.359869	0.250948	NaN	NaN	NaN	NaN	NaN	NaN	NaN	NaN	NaN	NaN
66.9434	-44.173	0.372329	0.347447	0.484541	0.518359	0.180847	0.404488	0.366929	0.250963	NaN	NaN	NaN	NaN	NaN	NaN	NaN	NaN	NaN	NaN
66.9466	-44.172	0.372331	0.347453	0.471816	0.540256	0.180852	0.393917	0.366671	0.267715	NaN	NaN	NaN	NaN	NaN	NaN	NaN	NaN	NaN	NaN
66.95	-44.171	0.372333	0.347458	0.465471	0.551211	0.180858	0.388649	0.359392	0.284465	NaN	NaN	NaN	NaN	NaN	NaN	NaN	NaN	NaN	NaN
66.9516	-44.1706	0.372335	0.347463	0.465485	0.551234	0.180862	0.388669	0.352256	0.292844	NaN	NaN	NaN	NaN	NaN	NaN	NaN	NaN	NaN	NaN
66.9549	-44.1697	0.372337	0.347467	0.465497	0.551256	0.180867	0.378101	0.366324	0.292858	NaN	NaN	NaN	NaN	NaN	NaN	NaN	NaN	NaN	NaN
66.9581	-44.1687	0.372339	0.347471	0.46551	0.551277	0.180872	0.367548	0.380385	0.292872	NaN	NaN	NaN	NaN	NaN	NaN	NaN	NaN	NaN	NaN
66.9598	-44.1683	0.372341	0.347475	0.465521	0.551294	0.184543	0.357161	0.387419	0.292883	NaN	NaN	NaN	NaN	NaN	NaN	NaN	NaN	NaN	NaN
66.963	-44.1673	0.372343	0.347478	0.471894	0.54038	0.191889	0.34164	0.380121	0.309639	NaN	NaN	NaN	NaN	NaN	NaN	NaN	NaN	NaN	NaN
66.9646	-44.1668	0.372345	0.347481	0.478272	0.529456	0.195568	0.331245	0.379989	0.31802	NaN	NaN	NaN	NaN	NaN	NaN	NaN	NaN	NaN	NaN
66.9679	-44.1658	0.372347	0.347484	0.491036	0.507571	0.19925	0.315586	0.379711	0.334765	NaN	NaN	NaN	NaN	NaN	NaN	NaN	NaN	NaN	NaN
66.9711	-44.1648	0.372348	0.347486	0.497431	0.496622	0.199253	0.310331	0.386725	0.334773	NaN	NaN	NaN	NaN	NaN	NaN	NaN	NaN	NaN	NaN
66.9727	-44.1643	0.37235	0.347488	0.497437	0.49663	0.199257	0.310337	0.386732	0.334779	NaN	NaN	NaN	NaN	NaN	NaN	NaN	NaN	NaN	NaN
66.976	-44.1633	0.372352	0.347491	0.497443	0.496638	0.19926	0.310342	0.372432	0.351535	NaN	NaN	NaN	NaN	NaN	NaN	NaN	NaN	NaN	NaN
66.9792	-44.1623	0.372354	0.347493	0.484681	0.518556	0.199264	0.310348	0.358155	0.368283	NaN	NaN	NaN	NaN	NaN	NaN	NaN	NaN	NaN	NaN
66.9809	-44.1619	0.372356	0.347495	0.478311	0.529509	0.199267	0.310354	0.351028	0.376659	NaN	NaN	NaN	NaN	NaN	NaN	NaN	NaN	NaN	NaN
66.9841	-44.161	0.372358	0.347496	0.46558	0.562613	0.195689	0.310357	0.351031	0.37666	NaN	NaN	NaN	NaN	NaN	NaN	NaN	NaN	NaN	NaN
66.9857	-44.1605	0.37236	0.351742	0.4595	0.57385	0.192108	0.310356	0.351028	0.376656	NaN	NaN	NaN	NaN	NaN	NaN	NaN	NaN	NaN	NaN
66.989	-44.1595	0.372362	0.360249	0.447325	0.596363	0.184936	0.310357	0.351027	0.376652	NaN	NaN	NaN	NaN	NaN	NaN	NaN	NaN	NaN	NaN
66.9922	-44.1586	0.372364	0.368774	0.44149	0.596688	0.181347	0.310355	0.351022	0.376645	NaN	NaN	NaN	NaN	NaN	NaN	NaN	NaN	NaN	NaN
66.9939	-44.1581	0.372366	0.368773	0.447855	0.58573	0.181348	0.310352	0.351016	0.376635	NaN	NaN	NaN	NaN	NaN	NaN	NaN	NaN	NaN	NaN
66.9971	-44.1571	0.372368	0.368772	0.473363	0.541892	0.181349	0.310349	0.365278	0.359892	NaN	NaN	NaN	NaN	NaN	NaN	NaN	NaN	NaN	NaN
67.0004	-44.1561	0.37237	0.377305	0.480347	0.508956	0.181351	0.310351	0.379572	0.343151	NaN	NaN	NaN	NaN	NaN	NaN	NaN	NaN	NaN	NaN
67.002	-44.1556	0.372372	0.38158	0.487042	0.486991	0.181354	0.310354	0.393882	0.326412	NaN	NaN	NaN	NaN	NaN	NaN	NaN	NaN	NaN	NaN
67.0052	-44.1546	0.372374	0.390141	0.48762	0.465014	0.181356	0.315617	0.401199	0.309676	NaN	NaN	NaN	NaN	NaN	NaN	NaN	NaN	NaN	NaN
67.0069	-44.1541	0.372376	0.390143	0.494041	0.454018	0.181359	0.320885	0.401358	0.301306	NaN	NaN	NaN	NaN	NaN	NaN	NaN	NaN	NaN	NaN
67.0101	-44.1531	0.372378	0.390145	0.513313	0.432241	0.174095	0.336564	0.394498	0.292936	NaN	NaN	NaN	NaN	NaN	NaN	NaN	NaN	NaN	NaN
67.0134	-44.1521	0.37238	0.398715	0.513938	0.432698	0.159569	0.352109	0.401824	0.276207	NaN	NaN	NaN	NaN	NaN	NaN	NaN	NaN	NaN	NaN
67.015	-44.1516	0.372382	0.403008	0.51425	0.444179	0.148715	0.357238	0.409006	0.26784	NaN	NaN	NaN	NaN	NaN	NaN	NaN	NaN	NaN	NaN
67.0182	-44.1507	0.372384	0.411605	0.495529	0.489066	0.134255	0.372925	0.409326	0.251096	NaN	NaN	NaN	NaN	NaN	NaN	NaN	NaN	NaN	NaN
67.0215	-44.1498	0.372386	0.411607	0.469811	0.555835	0.127049	0.383506	0.395262	0.251098	NaN	NaN	NaN	NaN	NaN	NaN	NaN	NaN	NaN	NaN
67.0231	-44.1493	0.372388	0.411609	0.463404	0.555536	0.130656	0.388807	0.388231	0.251102	NaN	NaN	NaN	NaN	NaN	NaN	NaN	NaN	NaN	NaN
67.0264	-44.1484	0.375827	0.407423	0.457009	0.53264	0.141465	0.399413	0.374181	0.251111	NaN	NaN	NaN	NaN	NaN	NaN	NaN	NaN	NaN	NaN
67.028	-44.1479	0.379272	0.403234	0.457015	0.510085	0.14866	0.404724	0.367151	0.251117	NaN	NaN	NaN	NaN	NaN	NaN	NaN	NaN	NaN	NaN
67.0313	-44.1469	0.386182	0.394855	0.444202	0.475817	0.166619	0.420661	0.353212	0.242756	NaN	NaN	NaN	NaN	NaN	NaN	NaN	NaN	NaN	NaN
67.0345	-44.1459	0.389536	0.390669	0.418636	0.486042	0.177373	0.431307	0.35349	0.226022	NaN	NaN	NaN	NaN	NaN	NaN	NaN	NaN	NaN	NaN
67.0362	-44.1454	0.389536	0.390674	0.412262	0.485801	0.180957	0.436647	0.353637	0.217656	NaN	NaN	NaN	NaN	NaN	NaN	NaN	NaN	NaN	NaN
67.0394	-44.1444	0.389537	0.390679	0.405894	0.49677	0.180962	0.441993	0.353785	0.209288	NaN	NaN	NaN	NaN	NaN	NaN	NaN	NaN	NaN	NaN
67.041	-44.1439	0.389537	0.386395	0.41204	0.496782	0.180966	0.442007	0.353796	0.209293	NaN	NaN	NaN	NaN	NaN	NaN	NaN	NaN	NaN	NaN
67.0443	-44.1429	0.389538	0.377837	0.424311	0.519248	0.173806	0.44202	0.368185	0.192557	NaN	NaN	NaN	NaN	NaN	NaN	NaN	NaN	NaN	NaN
67.0476	-44.1419	0.389539	0.369297	0.43656	0.541759	0.166636	0.436707	0.389666	0.175812	NaN	NaN	NaN	NaN	NaN	NaN	NaN	NaN	NaN	NaN
67.0492	-44.1414	0.389539	0.3693	0.436567	0.553036	0.163049	0.431396	0.403954	0.167439	NaN	NaN	NaN	NaN	NaN	NaN	NaN	NaN	NaN	NaN
67.0525	-44.1405	0.38954	0.365033	0.442697	0.55305	0.163052	0.420776	0.418093	0.167443	NaN	NaN	NaN	NaN	NaN	NaN	NaN	NaN	NaN	NaN
67.0557	-44.1396	0.389541	0.356509	0.454934	0.553062	0.163055	0.415477	0.425164	0.167447	NaN	NaN	NaN	NaN	NaN	NaN	NaN	NaN	NaN	NaN
67.0574	-44.1392	0.389541	0.352256	0.461049	0.553076	0.163059	0.410176	0.432243	0.167452	NaN	NaN	NaN	NaN	NaN	NaN	NaN	NaN	NaN	NaN
67.0607	-44.1382	0.389542	0.348007	0.467159	0.55309	0.163062	0.383661	0.467576	0.167456	NaN	NaN	NaN	NaN	NaN	NaN	NaN	NaN	NaN	NaN
67.0623	-44.1377	0.389542	0.348009	0.467164	0.553097	0.163065	0.362501	0.495814	0.167459	NaN	NaN	NaN	NaN	NaN	NaN	NaN	NaN	NaN	NaN
67.0656	-44.1367	0.382738	0.356342	0.454398	0.552509	0.170246	0.320344	0.537679	0.184216	NaN	NaN	NaN	NaN	NaN	NaN	NaN	NaN	NaN	NaN
67.0688	-44.1357	0.375853	0.364676	0.43528	0.551618	0.181003	0.294093	0.551102	0.209348	NaN	NaN	NaN	NaN	NaN	NaN	NaN	NaN	NaN	NaN
67.0705	-44.1351	0.372424	0.368842	0.422559	0.551015	0.188164	0.288849	0.536404	0.234479	NaN	NaN	NaN	NaN	NaN	NaN	NaN	NaN	NaN	NaN
67.0737	-44.1341	0.372426	0.36884	0.409851	0.550405	0.195317	0.283607	0.507299	0.27636	NaN	NaN	NaN	NaN	NaN	NaN	NaN	NaN	NaN	NaN
67.077	-44.1331	0.372428	0.368839	0.416197	0.528282	0.19889	0.294084	0.457314	0.318208	NaN	NaN	NaN	NaN	NaN	NaN	NaN	NaN	NaN	NaN
67.0786	-44.1327	0.37243	0.368839	0.422553	0.517365	0.198892	0.299331	0.44313	0.326579	NaN	NaN	NaN	NaN	NaN	NaN	NaN	NaN	NaN	NaN
67.0819	-44.1317	0.372432	0.368841	0.44802	0.473667	0.198895	0.320349	0.407953	0.334954	NaN	NaN	NaN	NaN	NaN	NaN	NaN	NaN	NaN	NaN
67.0835	-44.1313	0.372434	0.368843	0.454401	0.462738	0.198899	0.325615	0.408114	0.326589	NaN	NaN	NaN	NaN	NaN	NaN	NaN	NaN	NaN	NaN
67.0868	-44.1304	0.372436	0.368846	0.467176	0.440852	0.198902	0.341424	0.401418	0.309849	NaN	NaN	NaN	NaN	NaN	NaN	NaN	NaN	NaN	NaN
67.0901	-44.1294	0.372438	0.368849	0.467184	0.44086	0.198906	0.351979	0.408915	0.284731	NaN	NaN	NaN	NaN	NaN	NaN	NaN	NaN	NaN	NaN
67.0917	-44.129	0.37244	0.368852	0.467191	0.440869	0.19891	0.357266	0.409077	0.276364	NaN	NaN	NaN	NaN	NaN	NaN	NaN	NaN	NaN	NaN
67.095	-44.128	0.372442	0.368854	0.467198	0.463253	0.191764	0.362558	0.416427	0.259617	NaN	NaN	NaN	NaN	NaN	NaN	NaN	NaN	NaN	NaN
67.0982	-44.127	0.372444	0.368857	0.467204	0.496896	0.18103	0.362565	0.42363	0.251244	NaN	NaN	NaN	NaN	NaN	NaN	NaN	NaN	NaN	NaN
67.0999	-44.1265	0.372445	0.368859	0.467211	0.519377	0.173863	0.362573	0.42364	0.251249	NaN	NaN	NaN	NaN	NaN	NaN	NaN	NaN	NaN	NaN
67.1031	-44.1254	0.372447	0.368862	0.479994	0.542464	0.159515	0.362581	0.423651	0.251255	NaN	NaN	NaN	NaN	NaN	NaN	NaN	NaN	NaN	NaN
67.1047	-44.1249	0.372449	0.368865	0.486399	0.554056	0.152327	0.362589	0.423662	0.251261	NaN	NaN	NaN	NaN	NaN	NaN	NaN	NaN	NaN	NaN
67.108	-44.1239	0.372451	0.368868	0.512034	0.532654	0.145133	0.362598	0.423673	0.251267	NaN	NaN	NaN	NaN	NaN	NaN	NaN	NaN	NaN	NaN
67.1113	-44.1229	0.372453	0.368871	0.524882	0.488069	0.144996	0.367575	0.430721	0.234353	NaN	NaN	NaN	NaN	NaN	NaN	NaN	NaN	NaN	NaN
67.1129	-44.1224	0.372455	0.368874	0.524891	0.476812	0.144929	0.367423	0.437766	0.225909	NaN	NaN	NaN	NaN	NaN	NaN	NaN	NaN	NaN	NaN
67.1162	-44.1215	0.372457	0.368876	0.505638	0.464836	0.151969	0.367108	0.451837	0.209038	NaN	NaN	NaN	NaN	NaN	NaN	NaN	NaN	NaN	NaN
67.1194	-44.1205	0.369073	0.373061	0.473638	0.474803	0.166309	0.361843	0.43727	0.2257	NaN	NaN	NaN	NaN	NaN	NaN	NaN	NaN	NaN	NaN
67.1211	-44.1201	0.365663	0.377245	0.46087	0.463098	0.177045	0.361851	0.415712	0.242354	NaN	NaN	NaN	NaN	NaN	NaN	NaN	NaN	NaN	NaN
67.1243	-44.1191	0.358623	0.385612	0.441753	0.451173	0.191333	0.361858	0.351283	0.292202	NaN	NaN	NaN	NaN	NaN	NaN	NaN	NaN	NaN	NaN
67.126	-44.1187	0.351605	0.393997	0.44176	0.440016	0.194904	0.361867	0.322783	0.308674	NaN	NaN	NaN	NaN	NaN	NaN	NaN	NaN	NaN	NaN
67.1294	-44.1176	0.34461	0.402399	0.454517	0.407019	0.198472	0.361875	0.273065	0.341657	NaN	NaN	NaN	NaN	NaN	NaN	NaN	NaN	NaN	NaN
67.1326	-44.1166	0.337653	0.410802	0.480075	0.363271	0.198475	0.361882	0.251828	0.34129	NaN	NaN	NaN	NaN	NaN	NaN	NaN	NaN	NaN	NaN
67.1343	-44.1161	0.337655	0.410806	0.486482	0.35233	0.19848	0.361892	0.244763	0.341175	NaN	NaN	NaN	NaN	NaN	NaN	NaN	NaN	NaN	NaN
67.1375	-44.115	0.337657	0.41081	0.499308	0.33042	0.198484	0.361905	0.251843	0.324439	NaN	NaN	NaN	NaN	NaN	NaN	NaN	NaN	NaN	NaN
67.1392	-44.1145	0.33766	0.410815	0.499319	0.330428	0.198489	0.361918	0.25893	0.316136	NaN	NaN	NaN	NaN	NaN	NaN	NaN	NaN	NaN	NaN
67.1424	-44.1136	0.344623	0.40242	0.499332	0.352721	0.191361	0.372484	0.273325	0.282882	NaN	NaN	NaN	NaN	NaN	NaN	NaN	NaN	NaN	NaN
67.1457	-44.1126	0.351623	0.394025	0.499345	0.375059	0.184222	0.383068	0.294874	0.241295	NaN	NaN	NaN	NaN	NaN	NaN	NaN	NaN	NaN	NaN
67.1473	-44.1121	0.358646	0.385648	0.49936	0.386253	0.180651	0.388378	0.302125	0.224657	NaN	NaN	NaN	NaN	NaN	NaN	NaN	NaN	NaN	NaN
67.1506	-44.1112	0.365693	0.377287	0.505783	0.375298	0.180656	0.388396	0.330673	0.191381	NaN	NaN	NaN	NaN	NaN	NaN	NaN	NaN	NaN	NaN
67.1539	-44.1103	0.372485	0.368928	0.518635	0.353353	0.180661	0.388417	0.344987	0.174743	NaN	NaN	NaN	NaN	NaN	NaN	NaN	NaN	NaN	NaN
67.1555	-44.1098	0.372487	0.368933	0.525079	0.342375	0.180666	0.388437	0.352164	0.166424	NaN	NaN	NaN	NaN	NaN	NaN	NaN	NaN	NaN	NaN
67.1588	-44.1088	0.372489	0.368937	0.531521	0.331385	0.18067	0.377866	0.366223	0.166429	NaN	NaN	NaN	NaN	NaN	NaN	NaN	NaN	NaN	NaN
67.1604	-44.1083	0.372491	0.368939	0.531528	0.33139	0.180673	0.372588	0.37325	0.166432	NaN	NaN	NaN	NaN	NaN	NaN	NaN	NaN	NaN	NaN
67.1637	-44.1073	0.372493	0.368941	0.531535	0.331395	0.180676	0.356759	0.394312	0.166435	NaN	NaN	NaN	NaN	NaN	NaN	NaN	NaN	NaN	NaN
67.167	-44.1063	0.372495	0.368943	0.518679	0.353387	0.180678	0.346217	0.408347	0.166437	NaN	NaN	NaN	NaN	NaN	NaN	NaN	NaN	NaN	NaN
67.1686	-44.1058	0.372497	0.368944	0.51226	0.364373	0.18068	0.340952	0.415359	0.166439	NaN	NaN	NaN	NaN	NaN	NaN	NaN	NaN	NaN	NaN
67.1719	-44.1048	0.365714	0.381582	0.480513	0.408273	0.180682	0.330428	0.429383	0.16644	NaN	NaN	NaN	NaN	NaN	NaN	NaN	NaN	NaN	NaN
67.1752	-44.1038	0.358673	0.398524	0.455496	0.430201	0.180685	0.319917	0.44341	0.166443	NaN	NaN	NaN	NaN	NaN	NaN	NaN	NaN	NaN	NaN
67.1768	-44.1033	0.355167	0.407013	0.442994	0.44116	0.180688	0.314672	0.450427	0.166446	NaN	NaN	NaN	NaN	NaN	NaN	NaN	NaN	NaN	NaN
67.1801	-44.1024	0.355169	0.411316	0.424101	0.463081	0.180692	0.309431	0.457444	0.183222	NaN	NaN	NaN	NaN	NaN	NaN	NaN	NaN	NaN	NaN
67.1818	-44.102	0.355172	0.41132	0.41773	0.462835	0.184272	0.30944	0.45746	0.191625	NaN	NaN	NaN	NaN	NaN	NaN	NaN	NaN	NaN	NaN
67.1851	-44.101	0.355175	0.411325	0.405	0.462334	0.191422	0.309451	0.457485	0.208451	NaN	NaN	NaN	NaN	NaN	NaN	NaN	NaN	NaN	NaN
67.1884	-44.1001	0.355177	0.41133	0.405009	0.440007	0.198563	0.309462	0.457506	0.208458	NaN	NaN	NaN	NaN	NaN	NaN	NaN	NaN	NaN	NaN
67.19	-44.0996	0.35518	0.411336	0.40502	0.440023	0.198568	0.309474	0.457533	0.208466	NaN	NaN	NaN	NaN	NaN	NaN	NaN	NaN	NaN	NaN
67.1933	-44.0985	0.355182	0.411343	0.405032	0.44004	0.198574	0.304237	0.464577	0.208475	NaN	NaN	NaN	NaN	NaN	NaN	NaN	NaN	NaN	NaN
67.1966	-44.0974	0.355185	0.411349	0.405043	0.440056	0.198579	0.293761	0.478626	0.208484	NaN	NaN	NaN	NaN	NaN	NaN	NaN	NaN	NaN	NaN
67.1982	-44.0969	0.355188	0.411354	0.405053	0.440071	0.198585	0.288533	0.48566	0.208492	NaN	NaN	NaN	NaN	NaN	NaN	NaN	NaN	NaN	NaN
67.2015	-44.0958	0.35519	0.411358	0.405061	0.440081	0.198589	0.283306	0.492681	0.208498	NaN	NaN	NaN	NaN	NaN	NaN	NaN	NaN	NaN	NaN
67.2032	-44.0953	0.355193	0.411362	0.405068	0.440091	0.194925	0.288425	0.492699	0.208504	NaN	NaN	NaN	NaN	NaN	NaN	NaN	NaN	NaN	NaN
67.2065	-44.0943	0.355195	0.411366	0.405074	0.4401	0.187602	0.298648	0.478317	0.2252	NaN	NaN	NaN	NaN	NaN	NaN	NaN	NaN	NaN	NaN
67.2098	-44.0934	0.355198	0.411369	0.40508	0.440107	0.18029	0.308858	0.463956	0.24189	NaN	NaN	NaN	NaN	NaN	NaN	NaN	NaN	NaN	NaN
67.2114	-44.093	0.355201	0.407071	0.411212	0.440115	0.180294	0.308865	0.449611	0.250147	NaN	NaN	NaN	NaN	NaN	NaN	NaN	NaN	NaN	NaN
67.2147	-44.0921	0.355203	0.398488	0.423454	0.440123	0.180297	0.308871	0.435282	0.249974	NaN	NaN	NaN	NaN	NaN	NaN	NaN	NaN	NaN	NaN
67.218	-44.0911	0.355206	0.389924	0.435676	0.440131	0.1803	0.308878	0.413821	0.258133	NaN	NaN	NaN	NaN	NaN	NaN	NaN	NaN	NaN	NaN
67.2197	-44.0907	0.355208	0.389927	0.435683	0.44014	0.180304	0.308885	0.406681	0.266471	NaN	NaN	NaN	NaN	NaN	NaN	NaN	NaN	NaN	NaN
67.223	-44.0897	0.355211	0.38993	0.442061	0.429221	0.180307	0.308891	0.392407	0.283134	NaN	NaN	NaN	NaN	NaN	NaN	NaN	NaN	NaN	NaN
67.2246	-44.0892	0.355214	0.389932	0.448445	0.418295	0.18031	0.308897	0.385283	0.291466	NaN	NaN	NaN	NaN	NaN	NaN	NaN	NaN	NaN	NaN
67.2279	-44.0881	0.355216	0.389935	0.461225	0.396414	0.180313	0.308904	0.371029	0.308137	NaN	NaN	NaN	NaN	NaN	NaN	NaN	NaN	NaN	NaN
67.2312	-44.087	0.355219	0.389939	0.46763	0.385468	0.180317	0.308912	0.356803	0.324806	NaN	NaN	NaN	NaN	NaN	NaN	NaN	NaN	NaN	NaN
67.2329	-44.0865	0.355221	0.389943	0.467641	0.385478	0.180321	0.308922	0.349706	0.333146	NaN	NaN	NaN	NaN	NaN	NaN	NaN	NaN	NaN	NaN
67.2362	-44.0854	0.355224	0.389947	0.467649	0.385486	0.180324	0.30893	0.363944	0.316499	NaN	NaN	NaN	NaN	NaN	NaN	NaN	NaN	NaN	NaN
67.2378	-44.0849	0.355227	0.389947	0.46765	0.385488	0.180326	0.308931	0.371066	0.308168	NaN	NaN	NaN	NaN	NaN	NaN	NaN	NaN	NaN	NaN
67.2411	-44.0839	0.355229	0.389945	0.467644	0.385482	0.180326	0.308924	0.385315	0.291491	NaN	NaN	NaN	NaN	NaN	NaN	NaN	NaN	NaN	NaN
67.2444	-44.0829	0.355232	0.389942	0.467637	0.385476	0.180326	0.308918	0.385299	0.291482	NaN	NaN	NaN	NaN	NaN	NaN	NaN	NaN	NaN	NaN
67.2461	-44.0825	0.355234	0.389939	0.46763	0.38547	0.180326	0.308911	0.385283	0.291473	NaN	NaN	NaN	NaN	NaN	NaN	NaN	NaN	NaN	NaN
67.2494	-44.0816	0.355237	0.389937	0.467623	0.385464	0.180326	0.308904	0.399534	0.274812	NaN	NaN	NaN	NaN	NaN	NaN	NaN	NaN	NaN	NaN
67.2527	-44.0807	0.35524	0.389934	0.467617	0.385459	0.180326	0.308897	0.413808	0.258147	NaN	NaN	NaN	NaN	NaN	NaN	NaN	NaN	NaN	NaN
67.2543	-44.0802	0.355242	0.389934	0.467615	0.385458	0.180328	0.308895	0.420953	0.249814	NaN	NaN	NaN	NaN	NaN	NaN	NaN	NaN	NaN	NaN
67.2576	-44.0792	0.355245	0.389935	0.467618	0.385461	0.18033	0.308898	0.428107	0.241492	NaN	NaN	NaN	NaN	NaN	NaN	NaN	NaN	NaN	NaN
67.2592	-44.0787	0.355247	0.389936	0.467622	0.385464	0.180332	0.308901	0.435267	0.233169	NaN	NaN	NaN	NaN	NaN	NaN	NaN	NaN	NaN	NaN
67.2625	-44.0776	0.35525	0.389938	0.467627	0.38547	0.180335	0.308906	0.449608	0.216515	NaN	NaN	NaN	NaN	NaN	NaN	NaN	NaN	NaN	NaN
67.2658	-44.0766	0.355253	0.389941	0.467634	0.385476	0.180338	0.308912	0.456794	0.208188	NaN	NaN	NaN	NaN	NaN	NaN	NaN	NaN	NaN	NaN
67.2674	-44.076	0.355255	0.389944	0.46764	0.374322	0.183911	0.314158	0.449811	0.208193	NaN	NaN	NaN	NaN	NaN	NaN	NaN	NaN	NaN	NaN
67.2707	-44.075	0.355258	0.389948	0.467649	0.352041	0.191045	0.324657	0.435831	0.208198	NaN	NaN	NaN	NaN	NaN	NaN	NaN	NaN	NaN	NaN
67.274	-44.074	0.35526	0.389951	0.467659	0.329805	0.198169	0.335176	0.42184	0.208204	NaN	NaN	NaN	NaN	NaN	NaN	NaN	NaN	NaN	NaN
67.2756	-44.0735	0.355263	0.389955	0.467668	0.329812	0.198173	0.335186	0.421855	0.20821	NaN	NaN	NaN	NaN	NaN	NaN	NaN	NaN	NaN	NaN
67.2789	-44.0726	0.355266	0.389959	0.467678	0.32982	0.198178	0.335196	0.421871	0.208216	NaN	NaN	NaN	NaN	NaN	NaN	NaN	NaN	NaN	NaN
67.2805	-44.0721	0.355268	0.389963	0.467687	0.329827	0.198182	0.335205	0.421885	0.208222	NaN	NaN	NaN	NaN	NaN	NaN	NaN	NaN	NaN	NaN
67.2838	-44.0712	0.355271	0.389966	0.467696	0.329834	0.198186	0.335214	0.421899	0.208228	NaN	NaN	NaN	NaN	NaN	NaN	NaN	NaN	NaN	NaN
67.2871	-44.0702	0.355273	0.38997	0.467704	0.32984	0.19819	0.335222	0.421911	0.208233	NaN	NaN	NaN	NaN	NaN	NaN	NaN	NaN	NaN	NaN
67.2887	-44.0697	0.355276	0.389973	0.467711	0.329846	0.198193	0.33523	0.414752	0.216572	NaN	NaN	NaN	NaN	NaN	NaN	NaN	NaN	NaN	NaN
67.292	-44.0687	0.355279	0.389976	0.467719	0.329852	0.198197	0.335238	0.40044	0.233241	NaN	NaN	NaN	NaN	NaN	NaN	NaN	NaN	NaN	NaN
67.2952	-44.0677	0.355281	0.385694	0.473836	0.329857	0.1982	0.335243	0.386147	0.249901	NaN	NaN	NaN	NaN	NaN	NaN	NaN	NaN	NaN	NaN
67.2969	-44.0672	0.355284	0.381417	0.479946	0.32986	0.198203	0.335247	0.386151	0.249904	NaN	NaN	NaN	NaN	NaN	NaN	NaN	NaN	NaN	NaN
67.3002	-44.0662	0.355286	0.372875	0.492146	0.329864	0.198205	0.33525	0.371864	0.266574	NaN	NaN	NaN	NaN	NaN	NaN	NaN	NaN	NaN	NaN
67.3018	-44.0657	0.355289	0.368612	0.498239	0.329867	0.198208	0.335253	0.364731	0.274908	NaN	NaN	NaN	NaN	NaN	NaN	NaN	NaN	NaN	NaN
67.3051	-44.0646	0.355292	0.368614	0.498243	0.329871	0.198211	0.335257	0.350481	0.291567	NaN	NaN	NaN	NaN	NaN	NaN	NaN	NaN	NaN	NaN
67.3084	-44.0636	0.355294	0.368616	0.498248	0.329875	0.198213	0.335261	0.350485	0.291571	NaN	NaN	NaN	NaN	NaN	NaN	NaN	NaN	NaN	NaN
67.31	-44.0631	0.355297	0.368617	0.498253	0.329879	0.198216	0.330008	0.357479	0.291575	NaN	NaN	NaN	NaN	NaN	NaN	NaN	NaN	NaN	NaN
67.3133	-44.0621	0.355299	0.368619	0.498258	0.329883	0.198219	0.319508	0.371453	0.291579	NaN	NaN	NaN	NaN	NaN	NaN	NaN	NaN	NaN	NaN
67.3166	-44.0611	0.355302	0.368622	0.498266	0.329889	0.198223	0.309028	0.385422	0.291586	NaN	NaN	NaN	NaN	NaN	NaN	NaN	NaN	NaN	NaN
67.3183	-44.0607	0.355305	0.368627	0.49828	0.329899	0.198228	0.309041	0.385442	0.2916	NaN	NaN	NaN	NaN	NaN	NaN	NaN	NaN	NaN	NaN
67.3215	-44.0597	0.355307	0.368634	0.498304	0.329914	0.198236	0.298577	0.399446	0.291623	NaN	NaN	NaN	NaN	NaN	NaN	NaN	NaN	NaN	NaN
67.3232	-44.0592	0.35531	0.368642	0.498329	0.32993	0.198244	0.29336	0.406465	0.291648	NaN	NaN	NaN	NaN	NaN	NaN	NaN	NaN	NaN	NaN
67.3265	-44.0582	0.355312	0.36865	0.498354	0.329946	0.198251	0.282919	0.420463	0.291672	NaN	NaN	NaN	NaN	NaN	NaN	NaN	NaN	NaN	NaN
67.3298	-44.0572	0.355315	0.368658	0.498377	0.329961	0.198259	0.282936	0.420503	0.291696	NaN	NaN	NaN	NaN	NaN	NaN	NaN	NaN	NaN	NaN
67.3314	-44.0567	0.355318	0.368666	0.498403	0.329978	0.198267	0.282954	0.420547	0.291721	NaN	NaN	NaN	NaN	NaN	NaN	NaN	NaN	NaN	NaN
67.3347	-44.0557	0.35532	0.368672	0.498421	0.32999	0.198273	0.282968	0.420577	0.291739	NaN	NaN	NaN	NaN	NaN	NaN	NaN	NaN	NaN	NaN
67.3364	-44.0552	0.355323	0.368676	0.492028	0.340948	0.198278	0.282976	0.427744	0.283413	NaN	NaN	NaN	NaN	NaN	NaN	NaN	NaN	NaN	NaN
67.3397	-44.0541	0.355325	0.368679	0.479249	0.362837	0.198282	0.282984	0.44208	0.266745	NaN	NaN	NaN	NaN	NaN	NaN	NaN	NaN	NaN	NaN
67.343	-44.0531	0.355328	0.368681	0.466489	0.384697	0.198285	0.282988	0.456432	0.250066	NaN	NaN	NaN	NaN	NaN	NaN	NaN	NaN	NaN	NaN
67.3446	-44.0526	0.355331	0.368682	0.466493	0.3847	0.198287	0.282991	0.456435	0.250069	NaN	NaN	NaN	NaN	NaN	NaN	NaN	NaN	NaN	NaN
67.3479	-44.0516	0.355333	0.368684	0.466497	0.384705	0.19829	0.282995	0.470794	0.233399	NaN	NaN	NaN	NaN	NaN	NaN	NaN	NaN	NaN	NaN
67.3512	-44.0506	0.355336	0.368684	0.466498	0.384706	0.194629	0.288102	0.485167	0.216721	NaN	NaN	NaN	NaN	NaN	NaN	NaN	NaN	NaN	NaN
67.3528	-44.0501	0.355338	0.368685	0.466499	0.384707	0.190971	0.293206	0.492361	0.20838	NaN	NaN	NaN	NaN	NaN	NaN	NaN	NaN	NaN	NaN
67.3561	-44.0491	0.355341	0.368685	0.466498	0.384707	0.183661	0.303403	0.49235	0.20838	NaN	NaN	NaN	NaN	NaN	NaN	NaN	NaN	NaN	NaN
67.3578	-44.0486	0.355343	0.368686	0.4665	0.384709	0.180012	0.308499	0.492348	0.208381	NaN	NaN	NaN	NaN	NaN	NaN	NaN	NaN	NaN	NaN
67.3611	-44.0476	0.355346	0.368687	0.466502	0.384711	0.180014	0.308501	0.492346	0.225215	NaN	NaN	NaN	NaN	NaN	NaN	NaN	NaN	NaN	NaN
67.3644	-44.0466	0.36238	0.360343	0.466504	0.384714	0.180016	0.308503	0.477955	0.258787	NaN	NaN	NaN	NaN	NaN	NaN	NaN	NaN	NaN	NaN
67.366	-44.0461	0.365913	0.351912	0.472596	0.384712	0.180017	0.3085	0.470756	0.275587	NaN	NaN	NaN	NaN	NaN	NaN	NaN	NaN	NaN	NaN
67.3693	-44.0451	0.372647	0.33508	0.484764	0.384708	0.180018	0.308496	0.449214	0.30064	NaN	NaN	NaN	NaN	NaN	NaN	NaN	NaN	NaN	NaN
67.3726	-44.0441	0.372649	0.326606	0.496911	0.384706	0.180019	0.308493	0.434875	0.317343	NaN	NaN	NaN	NaN	NaN	NaN	NaN	NaN	NaN	NaN
67.3743	-44.0436	0.372651	0.326602	0.503274	0.373771	0.180017	0.308479	0.427682	0.32567	NaN	NaN	NaN	NaN	NaN	NaN	NaN	NaN	NaN	NaN
67.3776	-44.0426	0.372653	0.326599	0.516036	0.351897	0.180016	0.308465	0.413353	0.342347	NaN	NaN	NaN	NaN	NaN	NaN	NaN	NaN	NaN	NaN
67.3792	-44.0421	0.372655	0.326595	0.522416	0.340946	0.180014	0.308451	0.406179	0.350671	NaN	NaN	NaN	NaN	NaN	NaN	NaN	NaN	NaN	NaN
67.3825	-44.0411	0.372657	0.326595	0.528815	0.329998	0.180015	0.308449	0.391909	0.367357	NaN	NaN	NaN	NaN	NaN	NaN	NaN	NaN	NaN	NaN
67.3858	-44.04	0.372659	0.326596	0.52882	0.330002	0.180018	0.308453	0.399041	0.359016	NaN	NaN	NaN	NaN	NaN	NaN	NaN	NaN	NaN	NaN
67.3875	-44.0395	0.372661	0.326598	0.528824	0.330005	0.18002	0.308457	0.406178	0.350672	NaN	NaN	NaN	NaN	NaN	NaN	NaN	NaN	NaN	NaN
67.3908	-44.0385	0.372663	0.326604	0.522445	0.340969	0.180026	0.313708	0.413527	0.325528	NaN	NaN	NaN	NaN	NaN	NaN	NaN	NaN	NaN	NaN
67.3941	-44.0375	0.372665	0.32661	0.509679	0.362863	0.180033	0.324207	0.399604	0.308636	NaN	NaN	NaN	NaN	NaN	NaN	NaN	NaN	NaN	NaN
67.3957	-44.037	0.372667	0.326614	0.503311	0.373806	0.180038	0.32947	0.392646	0.300207	NaN	NaN	NaN	NaN	NaN	NaN	NaN	NaN	NaN	NaN
67.3991	-44.036	0.372669	0.330853	0.490873	0.384741	0.180043	0.334736	0.385679	0.29178	NaN	NaN	NaN	NaN	NaN	NaN	NaN	NaN	NaN	NaN
67.4007	-44.0355	0.372671	0.335097	0.484809	0.384754	0.183699	0.329652	0.385701	0.291795	NaN	NaN	NaN	NaN	NaN	NaN	NaN	NaN	NaN	NaN
67.404	-44.0345	0.372673	0.343595	0.472651	0.384767	0.191017	0.319461	0.385722	0.29181	NaN	NaN	NaN	NaN	NaN	NaN	NaN	NaN	NaN	NaN
67.4073	-44.0335	0.372675	0.347849	0.466556	0.395906	0.19478	0.309243	0.385718	0.291807	NaN	NaN	NaN	NaN	NaN	NaN	NaN	NaN	NaN	NaN
67.409	-44.033	0.372677	0.347848	0.46655	0.40705	0.191216	0.309238	0.385704	0.2918	NaN	NaN	NaN	NaN	NaN	NaN	NaN	NaN	NaN	NaN
67.4123	-44.032	0.372679	0.356359	0.454364	0.429383	0.184081	0.314483	0.378717	0.291798	NaN	NaN	NaN	NaN	NaN	NaN	NaN	NaN	NaN	NaN
67.4156	-44.031	0.372681	0.364888	0.442155	0.440565	0.18051	0.324984	0.379009	0.275126	NaN	NaN	NaN	NaN	NaN	NaN	NaN	NaN	NaN	NaN
67.4172	-44.0305	0.372683	0.369161	0.436042	0.440563	0.180511	0.33024	0.379152	0.266787	NaN	NaN	NaN	NaN	NaN	NaN	NaN	NaN	NaN	NaN
67.4205	-44.0295	0.372685	0.369161	0.436042	0.440562	0.180513	0.3355	0.386448	0.250106	NaN	NaN	NaN	NaN	NaN	NaN	NaN	NaN	NaN	NaN
67.4222	-44.0289	0.372687	0.369161	0.436043	0.440563	0.180515	0.335501	0.386446	0.250107	NaN	NaN	NaN	NaN	NaN	NaN	NaN	NaN	NaN	NaN
67.4255	-44.0279	0.372689	0.369163	0.436046	0.440566	0.180517	0.346027	0.386752	0.23344	NaN	NaN	NaN	NaN	NaN	NaN	NaN	NaN	NaN	NaN
67.4288	-44.0269	0.372691	0.369164	0.436049	0.440569	0.180519	0.356569	0.387056	0.233602	NaN	NaN	NaN	NaN	NaN	NaN	NaN	NaN	NaN	NaN
67.4305	-44.0264	0.372693	0.369167	0.436057	0.440579	0.180523	0.361855	0.394383	0.225345	NaN	NaN	NaN	NaN	NaN	NaN	NaN	NaN	NaN	NaN
67.4338	-44.0254	0.372695	0.36917	0.436065	0.440589	0.180526	0.361865	0.408744	0.225518	NaN	NaN	NaN	NaN	NaN	NaN	NaN	NaN	NaN	NaN
67.4354	-44.0249	0.372697	0.369173	0.436071	0.440596	0.18053	0.361873	0.415936	0.217168	NaN	NaN	NaN	NaN	NaN	NaN	NaN	NaN	NaN	NaN
67.4387	-44.0239	0.372699	0.369179	0.436086	0.440616	0.180535	0.361894	0.43754	0.192118	NaN	NaN	NaN	NaN	NaN	NaN	NaN	NaN	NaN	NaN
67.442	-44.0229	0.372701	0.369186	0.436102	0.440636	0.180541	0.356637	0.459019	0.192256	NaN	NaN	NaN	NaN	NaN	NaN	NaN	NaN	NaN	NaN
67.4437	-44.0223	0.372703	0.369192	0.436117	0.440657	0.180546	0.351384	0.473309	0.192329	NaN	NaN	NaN	NaN	NaN	NaN	NaN	NaN	NaN	NaN
67.447	-44.0213	0.372705	0.369198	0.436132	0.440676	0.180552	0.340867	0.487414	0.20922	NaN	NaN	NaN	NaN	NaN	NaN	NaN	NaN	NaN	NaN
67.4503	-44.0203	0.372707	0.369205	0.436148	0.440697	0.180558	0.335624	0.494487	0.209232	NaN	NaN	NaN	NaN	NaN	NaN	NaN	NaN	NaN	NaN
67.4519	-44.0198	0.372709	0.369211	0.436164	0.440718	0.180563	0.335644	0.494532	0.209243	NaN	NaN	NaN	NaN	NaN	NaN	NaN	NaN	NaN	NaN
67.4552	-44.0188	0.372711	0.369216	0.423415	0.440247	0.187713	0.335657	0.487333	0.217628	NaN	NaN	NaN	NaN	NaN	NaN	NaN	NaN	NaN	NaN
67.4569	-44.0183	0.372713	0.369221	0.417054	0.440017	0.191286	0.33567	0.480138	0.226011	NaN	NaN	NaN	NaN	NaN	NaN	NaN	NaN	NaN	NaN
67.4602	-44.0173	0.369388	0.373411	0.404339	0.439542	0.20575	0.325453	0.458524	0.251148	NaN	NaN	NaN	NaN	NaN	NaN	NaN	NaN	NaN	NaN
67.4635	-44.0162	0.362479	0.381787	0.397987	0.450476	0.213097	0.315223	0.429759	0.276189	NaN	NaN	NaN	NaN	NaN	NaN	NaN	NaN	NaN	NaN
67.4651	-44.0157	0.35896	0.385978	0.391639	0.461403	0.216778	0.310109	0.415413	0.284472	NaN	NaN	NaN	NaN	NaN	NaN	NaN	NaN	NaN	NaN
67.4684	-44.0147	0.35545	0.39017	0.378952	0.483223	0.216784	0.310121	0.386756	0.301011	NaN	NaN	NaN	NaN	NaN	NaN	NaN	NaN	NaN	NaN
67.4717	-44.0137	0.355452	0.390175	0.372622	0.494133	0.21679	0.299611	0.379325	0.317643	NaN	NaN	NaN	NaN	NaN	NaN	NaN	NaN	NaN	NaN
67.4734	-44.0132	0.355455	0.390179	0.372629	0.494146	0.216795	0.294366	0.37919	0.326016	NaN	NaN	NaN	NaN	NaN	NaN	NaN	NaN	NaN	NaN
67.4767	-44.0122	0.355458	0.390184	0.372638	0.494163	0.216801	0.283879	0.386053	0.317431	NaN	NaN	NaN	NaN	NaN	NaN	NaN	NaN	NaN	NaN
67.4783	-44.0117	0.35546	0.390182	0.372636	0.494154	0.216801	0.283875	0.38604	0.308953	NaN	NaN	NaN	NaN	NaN	NaN	NaN	NaN	NaN	NaN
67.4816	-44.0107	0.355463	0.390181	0.372633	0.494145	0.216801	0.283871	0.386027	0.292033	NaN	NaN	NaN	NaN	NaN	NaN	NaN	NaN	NaN	NaN
67.485	-44.0097	0.355465	0.390179	0.372631	0.494136	0.216801	0.283867	0.386015	0.292025	NaN	NaN	NaN	NaN	NaN	NaN	NaN	NaN	NaN	NaN
67.4866	-44.0092	0.355468	0.385887	0.385075	0.483226	0.216798	0.283858	0.38599	0.292011	NaN	NaN	NaN	NaN	NaN	NaN	NaN	NaN	NaN	NaN
67.4899	-44.0082	0.355471	0.377323	0.409972	0.461409	0.216796	0.28385	0.385968	0.291997	NaN	NaN	NaN	NaN	NaN	NaN	NaN	NaN	NaN	NaN
67.4932	-44.0072	0.355473	0.36878	0.434874	0.439568	0.216795	0.283843	0.385947	0.291984	NaN	NaN	NaN	NaN	NaN	NaN	NaN	NaN	NaN	NaN
67.4948	-44.0067	0.355476	0.36878	0.434875	0.439569	0.216797	0.283844	0.393089	0.283644	NaN	NaN	NaN	NaN	NaN	NaN	NaN	NaN	NaN	NaN
67.4981	-44.0056	0.355478	0.368781	0.434877	0.450725	0.213234	0.283845	0.407393	0.26696	NaN	NaN	NaN	NaN	NaN	NaN	NaN	NaN	NaN	NaN
67.4998	-44.0051	0.355481	0.368781	0.44124	0.45098	0.209668	0.283846	0.414552	0.258615	NaN	NaN	NaN	NaN	NaN	NaN	NaN	NaN	NaN	NaN
67.503	-44.0041	0.355484	0.368784	0.453987	0.451494	0.202529	0.283851	0.421729	0.250274	NaN	NaN	NaN	NaN	NaN	NaN	NaN	NaN	NaN	NaN
67.5063	-44.0031	0.358999	0.364613	0.46676	0.440805	0.198957	0.294351	0.414903	0.241939	NaN	NaN	NaN	NaN	NaN	NaN	NaN	NaN	NaN	NaN
67.508	-44.0025	0.362525	0.360443	0.466766	0.451999	0.195387	0.29961	0.415075	0.233602	NaN	NaN	NaN	NaN	NaN	NaN	NaN	NaN	NaN	NaN
67.5112	-44.0015	0.369435	0.352101	0.479544	0.452509	0.191908	0.305013	0.415405	0.216917	NaN	NaN	NaN	NaN	NaN	NaN	NaN	NaN	NaN	NaN
67.5145	-44.0005	0.372755	0.347931	0.492345	0.453017	0.192097	0.294765	0.422594	0.208573	NaN	NaN	NaN	NaN	NaN	NaN	NaN	NaN	NaN	NaN
67.5161	-44	0.372757	0.347933	0.505161	0.431069	0.199459	0.284512	0.4226	0.208576	NaN	NaN	NaN	NaN	NaN	NaN	NaN	NaN	NaN	NaN
67.5194	-43.999	0.372759	0.347934	0.51799	0.409107	0.21052	0.26911	0.422603	0.208579	NaN	NaN	NaN	NaN	NaN	NaN	NaN	NaN	NaN	NaN
67.5211	-43.9985	0.372761	0.347935	0.524415	0.409324	0.210629	0.263975	0.422606	0.208581	NaN	NaN	NaN	NaN	NaN	NaN	NaN	NaN	NaN	NaN
67.5243	-43.9975	0.372763	0.347937	0.543701	0.398763	0.214532	0.248557	0.42261	0.208584	NaN	NaN	NaN	NaN	NaN	NaN	NaN	NaN	NaN	NaN
67.5276	-43.9965	0.372765	0.347936	0.556573	0.410433	0.211147	0.238266	0.422599	0.208583	NaN	NaN	NaN	NaN	NaN	NaN	NaN	NaN	NaN	NaN
67.5292	-43.9961	0.372767	0.347936	0.563017	0.410642	0.211253	0.233117	0.422591	0.208582	NaN	NaN	NaN	NaN	NaN	NaN	NaN	NaN	NaN	NaN
67.5325	-43.9951	0.372769	0.347936	0.563014	0.433163	0.204055	0.233117	0.422584	0.208582	NaN	NaN	NaN	NaN	NaN	NaN	NaN	NaN	NaN	NaN
67.5341	-43.9946	0.372771	0.347938	0.563023	0.444449	0.200455	0.233122	0.422593	0.200168	NaN	NaN	NaN	NaN	NaN	NaN	NaN	NaN	NaN	NaN
67.5374	-43.9936	0.372773	0.347941	0.556583	0.432949	0.203962	0.238276	0.422601	0.183356	NaN	NaN	NaN	NaN	NaN	NaN	NaN	NaN	NaN	NaN
67.5407	-43.9926	0.366089	0.356287	0.543711	0.42124	0.207363	0.24857	0.422606	0.166575	NaN	NaN	NaN	NaN	NaN	NaN	NaN	NaN	NaN	NaN
67.5423	-43.9921	0.362559	0.360462	0.537291	0.409791	0.210857	0.253716	0.422618	0.166579	NaN	NaN	NaN	NaN	NaN	NaN	NaN	NaN	NaN	NaN
67.5456	-43.991	0.355525	0.36881	0.530876	0.398355	0.206963	0.263885	0.422465	0.174916	NaN	NaN	NaN	NaN	NaN	NaN	NaN	NaN	NaN	NaN
67.5488	-43.99	0.352009	0.373003	0.524459	0.375749	0.202977	0.273923	0.422147	0.174791	NaN	NaN	NaN	NaN	NaN	NaN	NaN	NaN	NaN	NaN
67.5505	-43.9895	0.348502	0.372921	0.524149	0.375556	0.199206	0.278931	0.414822	0.183057	NaN	NaN	NaN	NaN	NaN	NaN	NaN	NaN	NaN	NaN
67.5538	-43.9884	0.341514	0.372754	0.523517	0.375161	0.191664	0.294177	0.393196	0.199569	NaN	NaN	NaN	NaN	NaN	NaN	NaN	NaN	NaN	NaN
67.5554	-43.988	0.338034	0.372671	0.523204	0.374951	0.187902	0.304421	0.378917	0.216204	NaN	NaN	NaN	NaN	NaN	NaN	NaN	NaN	NaN	NaN
67.5587	-43.987	0.338037	0.368409	0.522876	0.363592	0.180398	0.324863	0.350393	0.249463	NaN	NaN	NaN	NaN	NaN	NaN	NaN	NaN	NaN	NaN
67.562	-43.986	0.338039	0.368411	0.510079	0.363208	0.172908	0.345284	0.329051	0.274407	NaN	NaN	NaN	NaN	NaN	NaN	NaN	NaN	NaN	NaN
67.5636	-43.9855	0.338042	0.368412	0.497296	0.373946	0.172825	0.350389	0.321949	0.282723	NaN	NaN	NaN	NaN	NaN	NaN	NaN	NaN	NaN	NaN
67.5669	-43.9845	0.338044	0.368414	0.478159	0.384445	0.165363	0.370775	0.314853	0.291037	NaN	NaN	NaN	NaN	NaN	NaN	NaN	NaN	NaN	NaN
67.5702	-43.9835	0.338046	0.36415	0.465132	0.394927	0.165193	0.380958	0.321957	0.28273	NaN	NaN	NaN	NaN	NaN	NaN	NaN	NaN	NaN	NaN
67.5718	-43.983	0.338049	0.359891	0.464843	0.394706	0.161476	0.385871	0.336048	0.27442	NaN	NaN	NaN	NaN	NaN	NaN	NaN	NaN	NaN	NaN
67.5751	-43.982	0.338051	0.351387	0.464262	0.394261	0.161312	0.385526	0.371374	0.249485	NaN	NaN	NaN	NaN	NaN	NaN	NaN	NaN	NaN	NaN
67.5767	-43.9815	0.338054	0.347144	0.463974	0.394043	0.161231	0.385357	0.392636	0.241257	NaN	NaN	NaN	NaN	NaN	NaN	NaN	NaN	NaN	NaN
67.58	-43.9804	0.338056	0.347146	0.46398	0.360788	0.168239	0.385187	0.421068	0.233114	NaN	NaN	NaN	NaN	NaN	NaN	NaN	NaN	NaN	NaN
67.5833	-43.9794	0.338058	0.347151	0.463994	0.338673	0.175322	0.379953	0.449584	0.233377	NaN	NaN	NaN	NaN	NaN	NaN	NaN	NaN	NaN	NaN
67.585	-43.9789	0.338061	0.347155	0.464008	0.327637	0.178862	0.364218	0.477795	0.233469	NaN	NaN	NaN	NaN	NaN	NaN	NaN	NaN	NaN	NaN
67.5883	-43.9779	0.345037	0.338833	0.464022	0.327647	0.178867	0.317156	0.547956	0.241991	NaN	NaN	NaN	NaN	NaN	NaN	NaN	NaN	NaN	NaN
67.5916	-43.9769	0.35205	0.330512	0.451344	0.349391	0.178873	0.270416	0.610767	0.250448	NaN	NaN	NaN	NaN	NaN	NaN	NaN	NaN	NaN	NaN
67.5932	-43.9764	0.355572	0.326354	0.445021	0.360261	0.178879	0.265252	0.610577	0.258819	NaN	NaN	NaN	NaN	NaN	NaN	NaN	NaN	NaN	NaN
67.5965	-43.9754	0.355574	0.32636	0.432376	0.381967	0.178885	0.275637	0.560653	0.292163	NaN	NaN	NaN	NaN	NaN	NaN	NaN	NaN	NaN	NaN
67.5981	-43.9749	0.355577	0.326363	0.432384	0.381975	0.178889	0.286032	0.517992	0.317117	NaN	NaN	NaN	NaN	NaN	NaN	NaN	NaN	NaN	NaN
67.6014	-43.9739	0.35558	0.330599	0.426339	0.381984	0.186155	0.301932	0.426028	0.358438	NaN	NaN	NaN	NaN	NaN	NaN	NaN	NaN	NaN	NaN
67.6047	-43.9729	0.362621	0.330772	0.426885	0.3603	0.193434	0.307441	0.369621	0.366216	NaN	NaN	NaN	NaN	NaN	NaN	NaN	NaN	NaN	NaN
67.6064	-43.9724	0.366157	0.330858	0.427155	0.360501	0.19354	0.307584	0.355575	0.357623	NaN	NaN	NaN	NaN	NaN	NaN	NaN	NaN	NaN	NaN
67.6097	-43.9714	0.372828	0.326782	0.433772	0.360896	0.190097	0.302503	0.36266	0.323994	NaN	NaN	NaN	NaN	NaN	NaN	NaN	NaN	NaN	NaN
67.6129	-43.9703	0.37283	0.326781	0.446471	0.37241	0.186744	0.307996	0.377316	0.290884	NaN	NaN	NaN	NaN	NaN	NaN	NaN	NaN	NaN	NaN
67.6146	-43.9698	0.372832	0.331017	0.446749	0.372611	0.186842	0.318583	0.384893	0.26605	NaN	NaN	NaN	NaN	NaN	NaN	NaN	NaN	NaN	NaN
67.6179	-43.9687	0.372834	0.339505	0.447311	0.384128	0.183479	0.350358	0.378977	0.233041	NaN	NaN	NaN	NaN	NaN	NaN	NaN	NaN	NaN	NaN
67.6195	-43.9682	0.372836	0.343755	0.447576	0.395481	0.18001	0.36104	0.379403	0.216456	NaN	NaN	NaN	NaN	NaN	NaN	NaN	NaN	NaN	NaN
67.6228	-43.9672	0.372838	0.348013	0.45423	0.407075	0.176633	0.366646	0.394166	0.191622	NaN	NaN	NaN	NaN	NaN	NaN	NaN	NaN	NaN	NaN
67.6261	-43.9662	0.37284	0.348014	0.479783	0.396809	0.169586	0.366807	0.408681	0.175018	NaN	NaN	NaN	NaN	NaN	NaN	NaN	NaN	NaN	NaN
67.6277	-43.9657	0.372842	0.348019	0.486196	0.40822	0.162447	0.372099	0.408868	0.166686	NaN	NaN	NaN	NaN	NaN	NaN	NaN	NaN	NaN	NaN
67.631	-43.9647	0.372844	0.348027	0.511861	0.397941	0.15172	0.387982	0.395021	0.166756	NaN	NaN	NaN	NaN	NaN	NaN	NaN	NaN	NaN	NaN
67.6326	-43.9642	0.372846	0.348036	0.518312	0.398187	0.148144	0.398606	0.388182	0.166827	NaN	NaN	NaN	NaN	NaN	NaN	NaN	NaN	NaN	NaN
67.6359	-43.9632	0.372848	0.348042	0.531193	0.387415	0.144564	0.40923	0.388512	0.166954	NaN	NaN	NaN	NaN	NaN	NaN	NaN	NaN	NaN	NaN
67.6392	-43.9622	0.37285	0.343787	0.537311	0.387425	0.144567	0.409245	0.381336	0.18373	NaN	NaN	NaN	NaN	NaN	NaN	NaN	NaN	NaN	NaN
67.6408	-43.9617	0.372852	0.339537	0.543423	0.387435	0.14457	0.403957	0.381204	0.192089	NaN	NaN	NaN	NaN	NaN	NaN	NaN	NaN	NaN	NaN
67.6441	-43.9607	0.372854	0.331048	0.549182	0.398454	0.144573	0.393376	0.373741	0.217154	NaN	NaN	NaN	NaN	NaN	NaN	NaN	NaN	NaN	NaN
67.6474	-43.9597	0.372856	0.326812	0.542422	0.398021	0.151742	0.388097	0.359258	0.242233	NaN	NaN	NaN	NaN	NaN	NaN	NaN	NaN	NaN	NaN
67.649	-43.9592	0.372858	0.326814	0.536012	0.397807	0.155324	0.388105	0.344948	0.258949	NaN	NaN	NaN	NaN	NaN	NaN	NaN	NaN	NaN	NaN
67.6523	-43.9581	0.37286	0.326817	0.523195	0.397388	0.162479	0.388117	0.309241	0.283813	NaN	NaN	NaN	NaN	NaN	NaN	NaN	NaN	NaN	NaN
67.6539	-43.9576	0.372862	0.326821	0.516799	0.408374	0.162483	0.388133	0.295005	0.292062	NaN	NaN	NaN	NaN	NaN	NaN	NaN	NaN	NaN	NaN
67.6572	-43.9566	0.366208	0.335145	0.504011	0.430315	0.162487	0.388149	0.280784	0.291861	NaN	NaN	NaN	NaN	NaN	NaN	NaN	NaN	NaN	NaN
67.6605	-43.9556	0.359152	0.343469	0.497629	0.430075	0.166067	0.382869	0.302036	0.275194	NaN	NaN	NaN	NaN	NaN	NaN	NaN	NaN	NaN	NaN
67.6621	-43.955	0.355639	0.347633	0.497637	0.418891	0.169644	0.37759	0.316182	0.25842	NaN	NaN	NaN	NaN	NaN	NaN	NaN	NaN	NaN	NaN
[truncated: 16,977 more rows]
